# Supplementary material for: Genome-Wide Identification and Expression Analysis of the bHLH Transcription Factor Family in Wintersweet (Chimonanthus praecox)
Source: MDPI journal article supplement (doi:10.3390/ijms241713462), 2023-08-30
Supplement: s1 [file s1]

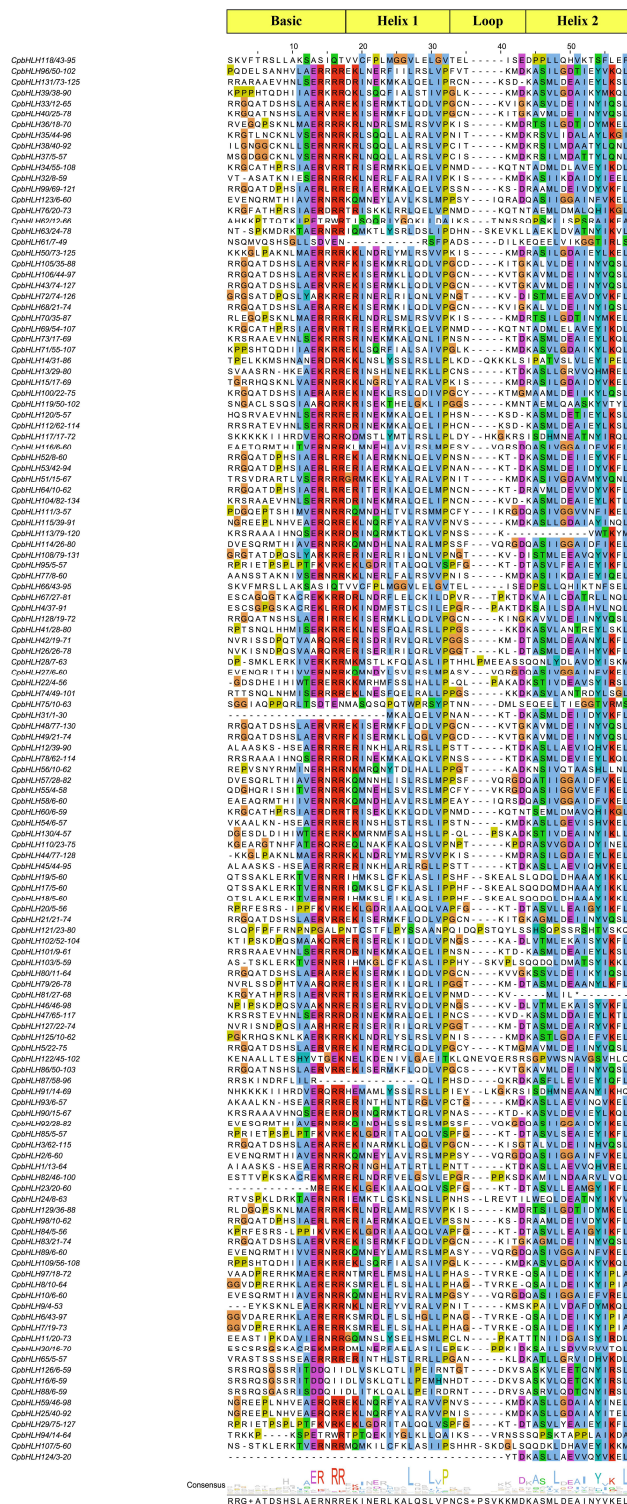

**Figure S1.** Partial display of sequence alignment of the CpbHLH proteins by Jalview. The capital letters of alphabet indicate the amino acids with more than 50% conservation.

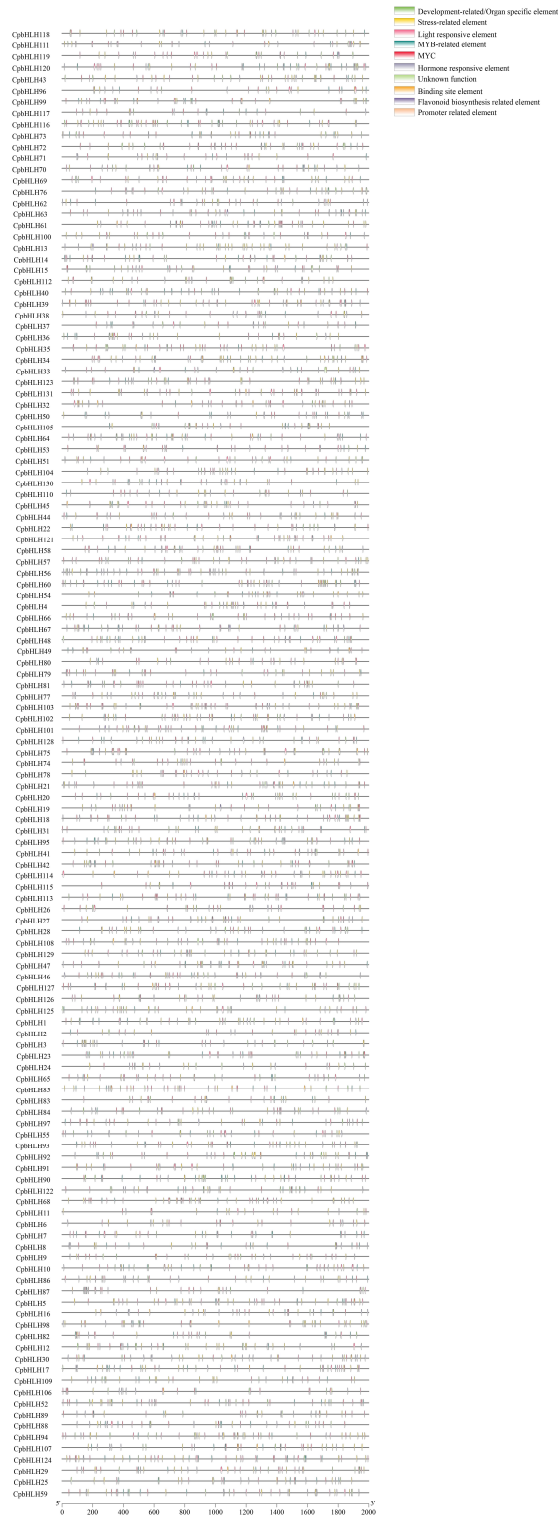

**Figure S2.** *Cis*-regulatory elements in the promoter regions of the *CpbHLH* genes. Different *cis*-regulatory elements are represented with different colored boxes, which are placed at the top on the right. The element size is estimated by the scale at the bottom
