# Supplementary material for: Genome-Wide Identification and Expression Analysis of the bHLH Transcription Factor Family in Wintersweet (Chimonanthus praecox)
Source: Int J Mol Sci. 2023 Aug 30;24(17):13462. doi: 10.3390/ijms241713462 (PMC10487621; doi:10.3390/ijms241713462)
Supplement: Supplementary file 1 [file ijms-24-13462-s001.zip › Supplementary tables.xls]

## Sheet: Properties of CpbHLHs
Table S1: Physico-chmical properties of CpbHLHs
Transcript ID	Gene Name	Chromosme	ORF (bp)	Protein length (aa)	PI	Protein molecular weight (kDa)	GRAVY	Subcellular localization
evm.model.scaffold_103.58	CpbHLH118	9	1728	575	5.61	65030.9	-0.663	Nucleus
evm.model.scaffold_149.203	CpbHLH96	7	1638	545	5.03	61317.6	-0.831	Nucleus
evm.model.scaffold_75.48	CpbHLH131	11	1449	482	6.26	52868.3	-0.757	Nucleus
evm.model.scaffold_70.358	CpbHLH39	3	1248	415	6.44	46811.2	-0.445	Nucleus
evm.model.scaffold_70.545	CpbHLH33	3	1248	415	7.27	44856.1	-0.593	Nucleus
evm.model.scaffold_70.335	CpbHLH40	3	1227	408	5.94	44852.1	-0.589	Nucleus
evm.model.scaffold_70.367	CpbHLH36	3	1089	362	4.98	40968.7	-0.339	extr
evm.model.scaffold_70.391	CpbHLH35	3	1476	491	4.83	55100.8	-0.499	Nucleus
evm.model.scaffold_70.361	CpbHLH38	3	1056	351	5.32	39868.2	-0.563	Chloroplast
evm.model.scaffold_70.362	CpbHLH37	3	828	275	5.14	31203.4	-0.457	Nucleus
evm.model.scaffold_70.437.2	CpbHLH34	3	1245	414	6.42	45360.3	-0.669	Nucleus
evm.model.scaffold_801.44	CpbHLH32	2	726	241	4.89	27580.5	-0.524	Nucleus
evm.model.scaffold_155.80	CpbHLH99	7	1257	418	9.5	45146.3	-0.373	Chloroplast
evm.model.scaffold_727.16	CpbHLH123	10	975	324	5.86	36522.4	-0.443	Nucleus
evm.model.scaffold_23.121	CpbHLH76	5	1068	355	6.54	38004.3	-0.452	Chloroplast
evm.model.scaffold_24.170	CpbHLH62	4	894	297	11.24	33163.7	-0.312	Nucleus
evm.model.scaffold_24.277	CpbHLH63	4	600	199	9.06	23185.8	-0.595	Cytoplasm
evm.model.scaffold_24.32_evm.model.scaffold_24.33	CpbHLH61	4	1245	414	8.89	45945.1	-0.809	Nucleus
evm.model.scaffold_89.14	CpbHLH50	3	1544	514	5.33	56004.8	-0.485	Nucleus
evm.model.scaffold_90.277	CpbHLH105	8	936	311	6.62	34925.1	-0.79	Nucleus
evm.model.scaffold_90.135	CpbHLH106	8	1506	501	5.52	54766.1	-0.586	Nucleus
evm.model.scaffold_145.109	CpbHLH43	3	1758	585	5.9	63215.6	-0.646	Nucleus
evm.model.scaffold_18.277	CpbHLH72	5	1056	351	4.63	38404.4	-0.651	Nucleus
evm.model.scaffold_18.530	CpbHLH68	5	906	301	5.61	32581.1	-0.62	Nucleus
evm.model.scaffold_18.355	CpbHLH70	5	987	328	4.84	37125	-0.509	Nucleus
evm.model.scaffold_18.431	CpbHLH69	5	1341	446	8.33	48427.9	-0.622	Nucleus
evm.model.scaffold_18.167	CpbHLH73	5	1395	464	6.38	50426.9	-0.353	Chloroplast
evm.model.scaffold_18.346	CpbHLH71	5	1044	347	6.17	38497.5	-0.474	Nucleus
evm.model.scaffold_47.202	CpbHLH14	1	684	227	5.87	25569.3	-0.389	Nucleus
evm.model.scaffold_47.115	CpbHLH13	1	711	236	8.64	26371.1	-0.545	Nucleus
evm.model.scaffold_55.138	CpbHLH15	1	1257	418	5.18	46636.2	-0.848	Nucleus
evm.model.scaffold_40.60	CpbHLH100	8	747	248	5.81	28198	-0.56	Nucleus
evm.model.scaffold_13.23	CpbHLH119	10	858	285	4.91	31933.2	-0.373	Nucleus
evm.model.scaffold_13.38	CpbHLH120	10	885	294	8.38	33371.3	-0.327	Chloroplast
evm.model.scaffold_59.62	CpbHLH112	9	1512	503	6.21	55901.8	-0.647	Nucleus
evm.model.scaffold_174.48	CpbHLH117	9	693	230	7.73	26174.9	-0.473	Nucleus
evm.model.scaffold_174.7	CpbHLH116	9	990	329	7.94	37372.5	-0.386	Nucleus
evm.model.scaffold_92.303	CpbHLH52	4	1338	445	5.39	47864.8	-0.322	Nucleus
evm.model.scaffold_92.17	CpbHLH53	4	1203	400	6.84	42436.4	-0.548	Nucleus
evm.model.scaffold_92.439	CpbHLH51	4	897	298	5.3	33695	-0.392	Nucleus
evm.model.scaffold_907.22	CpbHLH64	4	762	253	5.91	27536.1	-0.485	Nucleus
evm.model.scaffold_954.48.4	CpbHLH104	8	2271	756	6.43	81877.6	-0.607	Nucleus
evm.model.scaffold_128.104	CpbHLH111	9	990	329	7.1	36014.1	-0.336	Nucleus
evm.model.scaffold_86.2	CpbHLH115	9	2277	758	6.65	82809.9	-0.461	Nucleus
evm.model.scaffold_86.256	CpbHLH113	9	993	330	6.46	35790.7	-0.614	Nucleus
evm.model.scaffold_86.142	CpbHLH114	9	1230	409	6.04	46496.2	-0.64	Nucleus
evm.model.scaffold_9.22	CpbHLH108	8	1065	354	4.96	38989.2	-0.623	Nucleus
evm.model.scaffold_797.37	CpbHLH95	7	1383	460	5.13	50419	-0.526	Nucleus
evm.model.scaffold_250.23	CpbHLH77	5	759	252	5.14	28738.6	-0.524	Nucleus
evm.model.scaffold_176.125	CpbHLH66	4	1908	635	5.51	71694.8	-0.538	Nucleus
evm.model.scaffold_176.226	CpbHLH67	4	690	229	7.01	25971.7	-0.542	Nucleus
evm.model.scaffold_17.7	CpbHLH4	1	702	233	5.79	26317.8	-0.751	Nucleus
evm.model.scaffold_32.108	CpbHLH128	11	1311	436	5.58	47585.4	-0.718	Nucleus
evm.model.scaffold_855.53	CpbHLH41	3	1506	501	8.28	56188.6	-0.45	Nucleus
evm.model.scaffold_855.88	CpbHLH42	3	1491	496	5.93	54381.9	-0.508	Nucleus
evm.model.scaffold_865.209	CpbHLH26	2	633	210	9.42	23846.4	-0.531	Nucleus
evm.model.scaffold_865.552	CpbHLH28	2	576	191	8.29	21744.4	-0.301	Nucleus
evm.model.scaffold_865.282.1	CpbHLH27	2	990	329	6.32	36931.8	-0.369	Nucleus
evm.model.scaffold_131.115	CpbHLH22	2	813	270	8.25	29829.5	-0.597	Nucleus
evm.model.scaffold_5.167	CpbHLH74	5	1125	374	7.11	42085.9	-0.413	Nucleus
evm.model.scaffold_5.11	CpbHLH75	5	1041	346	7.13	38070.1	-0.896	Nucleus
evm.model.scaffold_752.25	CpbHLH31	2	465	154	5.51	16046.3	-0.073	Chloroplast
evm.model.scaffold_178.12.1	CpbHLH48	3	1620	539	6.48	58578.7	-0.547	Nucleus
evm.model.scaffold_178.166	CpbHLH49	3	924	307	8.73	34609.7	-0.758	Nucleus
evm.model.scaffold_648.4	CpbHLH12	1	996	331	5.71	36708.2	-0.567	Nucleus
evm.model.scaffold_731.73	CpbHLH78	5	1254	417	7.3	46385.2	-0.836	Nucleus
evm.model.scaffold_153.356	CpbHLH56	4	735	244	8.81	28007.9	-0.671	Nucleus
evm.model.scaffold_153.244	CpbHLH57	4	1170	389	8.21	43224.4	-0.304	Nucleus
evm.model.scaffold_153.430	CpbHLH55	4	1065	354	5.94	38843.1	-0.371	Nucleus
evm.model.scaffold_153.139	CpbHLH58	4	798	265	6.84	29688.7	-0.439	Nucleus
evm.model.scaffold_153.56	CpbHLH60	4	783	260	9.08	28269.8	-0.564	Nucleus
evm.model.scaffold_153.587	CpbHLH54	4	768	255	9.51	27868.8	-0.42	Chloroplast
evm.model.scaffold_101.90	CpbHLH130	11	885	294	5.87	32229.5	-0.409	Nucleus
evm.model.scaffold_108.51	CpbHLH110	9	1467	488	5.33	55629.7	-0.68	Nucleus
evm.model.scaffold_130.76	CpbHLH44	3	1581	526	5.18	57353.2	-0.521	Nucleus
evm.model.scaffold_130.236	CpbHLH45	3	1044	347	6.02	38044.7	-0.559	Nucleus
evm.model.scaffold_742.237	CpbHLH19	2	528	175	9.08	19806.1	-0.107	Cytoplasm
evm.model.scaffold_742.240	CpbHLH17	2	528	175	9.46	19810.2	-0.232	Cytoplasm
evm.model.scaffold_742.239	CpbHLH18	2	474	157	9.27	17674.8	-0.042	Cytoplasm
evm.model.scaffold_742.158.2	CpbHLH20	2	1224	407	6	44645.9	-0.468	Nucleus
evm.model.scaffold_742.133	CpbHLH21	2	1332	443	5.98	49271.6	-0.537	Nucleus
evm.model.scaffold_136.3	CpbHLH121	10	1218	405	8.14	44907.4	-0.704	extr
evm.model.scaffold_26.180	CpbHLH102	8	942	313	5.69	35156	-0.801	Nucleus
evm.model.scaffold_26.342	CpbHLH101	8	918	305	6.24	33386.3	-0.712	Nucleus
evm.model.scaffold_26.162	CpbHLH103	8	522	173	9.19	19467.9	-0.07	Cytoplasm
evm.model.scaffold_179.198.1	CpbHLH80	5	993	330	6.02	36323.6	-0.504	Chloroplast
evm.model.scaffold_179.285	CpbHLH79	5	921	306	6.12	34027	-0.648	Nucleus
evm.model.scaffold_179.88	CpbHLH81	5	1098	365	6.52	40304.2	-0.559	Nucleus
evm.model.scaffold_117.425	CpbHLH46	3	1014	337	5.79	37211.4	-0.647	Nucleus
evm.model.scaffold_117.205.4	CpbHLH47	3	2136	711	6.22	76845.1	-0.49	Nucleus
evm.model.scaffold_118.131	CpbHLH127	10	690	229	5.2	25775.1	-0.641	Nucleus
evm.model.scaffold_118.460	CpbHLH125	10	1836	611	5.3	68535	-0.601	Nucleus
evm.model.scaffold_52.293	CpbHLH5	1	828	275	5.5	30881.5	-0.64	Nucleus
evm.model.scaffold_167.32	CpbHLH122	10	792	263	7.11	28709.3	-0.659	Cytoplasm
evm.model.scaffold_35.39	CpbHLH86	6	1659	552	5.43	60068.9	-0.575	Nucleus
evm.model.scaffold_35.57	CpbHLH87	6	1128	375	6.81	41829.9	-0.799	Nucleus
evm.model.scaffold_162.252	CpbHLH91	7	765	254	7.68	28367.4	-0.448	Nucleus
evm.model.scaffold_162.11	CpbHLH93	7	750	249	8.53	27252	-0.283	Nucleus
evm.model.scaffold_162.478	CpbHLH90	7	1302	433	6.73	47063.2	-0.499	Nucleus
evm.model.scaffold_162.154	CpbHLH92	7	1089	362	5.37	41084.3	-0.541	Nucleus
evm.model.scaffold_141.209	CpbHLH85	6	1047	348	5.3	38373	-0.389	Nucleus
evm.model.scaffold_12.416	CpbHLH3	1	1152	383	5.83	41995.7	-0.689	Nucleus
evm.model.scaffold_12.249	CpbHLH2	1	909	302	6.47	34078.6	-0.462	Nucleus
evm.model.scaffold_12.223	CpbHLH1	1	702	233	8.97	25197.5	-0.315	Nucleus
evm.model.scaffold_64.63	CpbHLH82	6	864	287	7.75	31787.3	-0.34	Chloroplast
evm.model.scaffold_122.148	CpbHLH23	2	333	110	9.43	12169.1	-0.415	Nucleus
evm.model.scaffold_122.656	CpbHLH24	2	357	118	10.61	14055.1	-1.199	Nucleus
evm.model.scaffold_1094.29	CpbHLH129	11	969	322	4.98	36802.5	-0.615	Nucleus
evm.model.scaffold_577.3	CpbHLH98	7	882	293	6.25	31137.2	-0.335	Nucleus
evm.model.scaffold_147.57	CpbHLH84	6	1275	424	5.71	46411.6	-0.507	Nucleus
evm.model.scaffold_147.125	CpbHLH83	6	1107	368	9.02	40450.3	-0.646	Nucleus
evm.model.scaffold_96.505	CpbHLH89	6	975	324	6.22	36766.6	-0.451	Nucleus
evm.model.scaffold_8.109	CpbHLH109	8	1074	357	6.02	39754.9	-0.468	Nucleus
evm.model.scaffold_149.239	CpbHLH97	7	651	216	9.91	24205.7	-0.599	Nucleus
evm.model.scaffold_21.24	CpbHLH8	1	705	234	10.13	26211.9	-0.68	Nucleus
evm.model.scaffold_21.75	CpbHLH10	1	1011	336	5.08	37770.8	-0.464	Nucleus
evm.model.scaffold_21.70	CpbHLH9	1	525	174	5.89	20204.3	-0.506	Cytoplasm
evm.model.scaffold_21.22	CpbHLH6	1	738	245	9.91	27355.3	-0.643	Nucleus
evm.model.scaffold_21.23	CpbHLH7	1	732	243	9.57	27281	-0.677	Nucleus
evm.model.scaffold_21.169	CpbHLH11	1	534	177	8.97	19455.5	-0.204	Cytoplasm
evm.model.scaffold_74.30_evm.model.scaffold_74.31	CpbHLH30	2	765	254	5.56	28224.9	-0.616	Nucleus
evm.model.scaffold_138.9	CpbHLH65	4	717	238	9.32	26656.4	-0.46	Nucleus
evm.model.scaffold_118.330	CpbHLH126	10	279	92	5.78	10324.6	-0.482	Mitochondria
evm.model.scaffold_55.254	CpbHLH16	1	279	92	6.27	10343.7	-0.502	Mitochondria
evm.model.scaffold_96.612	CpbHLH88	6	273	90	7.98	10218.5	-0.471	Mitochondria
lmgene17771	CpbHLH59	4	1884	627	5.65	68707.3	-0.567	Nucleus
lmgene11587	CpbHLH25	2	1779	592	6.43	65502.5	-0.565	Nucleus
evm.model.scaffold_865.617	CpbHLH29	2	1293	430	5.71	47424	-0.69	Nucleus
evm.model.scaffold_421.98	CpbHLH94	7	873	290	10.26	32236.5	-0.331	Nucleus
evm.model.scaffold_591.3	CpbHLH107	8	537	178	9.53	20295.7	-0.426	Cytoplasm
evm.model.scaffold_727.50	CpbHLH124	10	453	150	5	16139.5	0.045	Cytoplasm

## Sheet: Gene duplication and KaKs value
Table S2: Ka/Ks values of duplicated CpbHLHs
Seq_1	Seq_2	Ka	Ks	Ka_Ks
evm.model.scaffold_55.138	evm.model.scaffold_118.460	0.206216	1.15996	0.177779	Segmental duplicates
evm.model.scaffold_12.223	evm.model.scaffold_727.50	0.210642	0.850788	0.247585	Segmental duplicates
evm.model.scaffold_12.249	evm.model.scaffold_727.16	0.137152	0.684837	0.200269	Segmental duplicates
evm.model.scaffold_12.249	evm.model.scaffold_865.282.1	0.251764	0.938611	0.26823	Segmental duplicates
evm.model.scaffold_648.4	evm.model.scaffold_130.236	0.095204	0.803888	0.118429	Segmental duplicates
evm.model.scaffold_12.249	evm.model.scaffold_96.505	0.180655	1.3475	0.134067	Segmental duplicates
evm.model.scaffold_55.254	evm.model.scaffold_96.612	0.105391	1.03365	0.10196	Segmental duplicates
evm.model.scaffold_21.22	evm.model.scaffold_149.239	0.199793	1.43166	0.139553	Segmental duplicates
evm.model.scaffold_52.293	evm.model.scaffold_40.60	0.320728	1.00272	0.319858	Segmental duplicates
evm.model.scaffold_727.16	evm.model.scaffold_865.282.1	0.258226	1.17141	0.220441	Segmental duplicates
evm.model.scaffold_727.16	evm.model.scaffold_96.505	0.197394	1.21214	0.162848	Segmental duplicates
evm.model.scaffold_13.38	evm.model.scaffold_59.62	0.275379	0.923851	0.298077	Segmental duplicates
evm.model.scaffold_101.90	evm.model.scaffold_131.115	0.232947	0.756962	0.307739	Segmental duplicates
evm.model.scaffold_32.108	evm.model.scaffold_70.335	0.350832	1.04168	0.336794	Segmental duplicates
evm.model.scaffold_752.25	evm.model.scaffold_92.17	0.135279	0.840895	0.160875	Segmental duplicates
evm.model.scaffold_122.656	evm.model.scaffold_24.277	0.399684	1.37767	0.290115	Segmental duplicates
evm.model.scaffold_801.44	evm.model.scaffold_250.23	0.232329	1.71035	0.135838	Segmental duplicates
evm.model.scaffold_865.282.1	evm.model.scaffold_96.505	0.193225	0.799557	0.241665	Segmental duplicates
evm.model.scaffold_742.158.2	evm.model.scaffold_147.57	0.175647	0.690454	0.254393	Segmental duplicates
evm.model.scaffold_742.133	evm.model.scaffold_147.125	0.24549	0.897358	0.27357	Segmental duplicates
evm.model.scaffold_865.617	evm.model.scaffold_797.37	0.21707	1.23939	0.175142	Segmental duplicates
evm.model.scaffold_742.240	evm.model.scaffold_26.162	0.103991	0.634971	0.163772	Segmental duplicates
evm.model.scaffold_742.240	evm.model.scaffold_591.3	0.253711	1.26776	0.200126	Segmental duplicates
evm.model.scaffold_145.109	evm.model.scaffold_178.12.1	0.273828	1.33448	0.205195	Segmental duplicates
evm.model.scaffold_70.545	evm.model.scaffold_18.530	0.158711	0.82331	0.192772	Segmental duplicates
evm.model.scaffold_70.437.2	evm.model.scaffold_18.431	0.153676	0.800011	0.192092	Segmental duplicates
evm.model.scaffold_70.367	evm.model.scaffold_18.355	0.138855	0.582714	0.23829	Segmental duplicates
evm.model.scaffold_70.358	evm.model.scaffold_18.346	0.177466	0.769409	0.230653	Segmental duplicates
evm.model.scaffold_855.53	evm.model.scaffold_5.167	0.210915	0.843335	0.250096	Segmental duplicates
evm.model.scaffold_70.437.2	evm.model.scaffold_179.88	0.292744	1.33731	0.218905	Segmental duplicates
evm.model.scaffold_70.545	evm.model.scaffold_179.198.1	0.268481	1.41241	0.190087	Segmental duplicates
evm.model.scaffold_117.205.4	evm.model.scaffold_954.48.4	0.316405	1.08888	0.290577	Segmental duplicates
evm.model.scaffold_178.12.1	evm.model.scaffold_90.135	0.249915	0.718714	0.347726	Segmental duplicates
evm.model.scaffold_178.166	evm.model.scaffold_90.277	0.268328	0.697217	0.384856	Segmental duplicates
evm.model.scaffold_70.362	evm.model.scaffold_8.109	0.916424	NaN	NaN	Segmental duplicates
evm.model.scaffold_117.425	evm.model.scaffold_26.180	0.290957	1.40226	0.207491	Segmental duplicates
evm.model.scaffold_145.109	evm.model.scaffold_90.135	0.240515	1.17817	0.204143	Segmental duplicates
evm.model.scaffold_24.32_evm.model.scaffold_24.33	evm.model.scaffold_35.57	0.215185	0.826851	0.260247	Segmental duplicates
evm.model.scaffold_153.244	evm.model.scaffold_162.154	0.258957	0.716909	0.361213	Segmental duplicates
evm.model.scaffold_153.587	evm.model.scaffold_162.11	0.189122	0.815634	0.231871	Segmental duplicates
evm.model.scaffold_24.170	evm.model.scaffold_421.98	0.278452	0.885499	0.314458	Segmental duplicates
evm.model.scaffold_907.22	evm.model.scaffold_155.80	0.159306	0.933405	0.170672	Segmental duplicates
evm.model.scaffold_153.430	evm.model.scaffold_128.104	0.239736	1.46734	0.163382	Segmental duplicates
evm.model.scaffold_153.244	evm.model.scaffold_86.142	0.288062	1.26412	0.227874	Segmental duplicates
evm.model.scaffold_153.139	evm.model.scaffold_174.7	0.213835	1.22879	0.17402	Segmental duplicates
evm.model.scaffold_18.530	evm.model.scaffold_179.198.1	0.249562	1.21261	0.205805	Segmental duplicates
evm.model.scaffold_18.431	evm.model.scaffold_179.88	0.239875	1.70334	0.140826	Segmental duplicates
evm.model.scaffold_18.346	evm.model.scaffold_8.109	0.161148	1.11667	0.144311	Segmental duplicates
evm.model.scaffold_18.277	evm.model.scaffold_9.22	0.310624	1.0584	0.293483	Segmental duplicates
evm.model.scaffold_141.209	evm.model.scaffold_797.37	0.210891	0.733445	0.287534	Segmental duplicates
evm.model.scaffold_162.252	evm.model.scaffold_174.48	0.333352	1.55522	0.214344	Segmental duplicates
evm.model.scaffold_162.154	evm.model.scaffold_86.142	0.258001	1.28809	0.200298	Segmental duplicates
evm.model.scaffold_162.478	evm.model.scaffold_86.256	0.306945	1.45517	0.210935	Segmental duplicates
evm.model.scaffold_26.162	evm.model.scaffold_591.3	0.290854	0.990321	0.293696	Segmental duplicates
evm.model.scaffold_26.342	evm.model.scaffold_59.62	0.251278	0.989644	0.253907	Segmental duplicates
lmgene17771	evm.model.scaffold_86.2	0.201317	1.88695	0.106689	Segmental duplicates
evm.model.scaffold_21.22	evm.model.scaffold_21.23	0.104979	0.384361	0.273127	Tandem duplicates
evm.model.scaffold_21.23	evm.model.scaffold_21.24	0.0115777	0.0458815	0.252338	Tandem duplicates
evm.model.scaffold_70.362	evm.model.scaffold_70.361	0.143393	0.454191	0.315711	Tandem duplicates
evm.model.scaffold_742.239	evm.model.scaffold_742.237	0.0604259	0.08958	0.674547	Tandem duplicates
evm.model.scaffold_742.240	evm.model.scaffold_742.239	0.0602424	0.102034	0.590416	Tandem duplicates

## Sheet: Synteny analysis
Table S3: Syntenic analysis between CpbHLHs, AtbHLHs, OsbHLHs, PtbHLHs and VvbHLHs
Chimonanthus praecox (CpbHLH)	Arabidopsis thaliana (AtbHLH)		Chimonanthus praecox (CpbHLH)	Oryza sativa (OsbHLH)		Chimonanthus praecox (CpbHLH)	Populus trichocarpa (PpbHLH)		Chimonanthus praecox (CpbHLH)	Vitis vinifera (VvbHLH)
Cp-evm.model.scaffold_75.48	At-AT4G28790.1.Araport11.447		Cp-evm.model.scaffold_70.358	Os-LOC_Os03g51580.1.MSUv7.0		Cp-evm.model.scaffold_149.203	Pp-Potri.002G054100.1.v4.1		Cp-evm.model.scaffold_149.203	Vv-VIT_207s0104g00090.1.v2.1
Cp-evm.model.scaffold_70.358	At-AT2G22750.3.Araport11.447		Cp-evm.model.scaffold_70.545	Os-LOC_Os03g58830.1.MSUv7.0		Cp-evm.model.scaffold_149.203	Pp-Potri.005G208600.4.v4.1		Cp-evm.model.scaffold_75.48	Vv-VIT_207s0005g05100.3.v2.1
Cp-evm.model.scaffold_70.358	At-AT4G37850.2.Araport11.447		Cp-evm.model.scaffold_70.335	Os-LOC_Os03g51910.1.MSUv7.0		Cp-evm.model.scaffold_75.48	Pp-Potri.002G252800.9.v4.1		Cp-evm.model.scaffold_70.545	Vv-VIT_201s0026g01140.1.v2.1
Cp-evm.model.scaffold_70.335	At-AT1G10120.1.Araport11.447		Cp-evm.model.scaffold_70.437.2	Os-LOC_Os08g39630.1.MSUv7.0		Cp-evm.model.scaffold_70.358	Pp-Potri.001G287200.1.v4.1		Cp-evm.model.scaffold_70.335	Vv-VIT_218s0001g08600.1.v2.1
Cp-evm.model.scaffold_70.367	At-AT5G65640.1.Araport11.447		Cp-evm.model.scaffold_70.437.2	Os-LOC_Os09g31300.1.MSUv7.0		Cp-evm.model.scaffold_70.358	Pp-Potri.007G009400.4.v4.1		Cp-evm.model.scaffold_70.367	Vv-VIT_218s0001g08040.1.v2.1
Cp-evm.model.scaffold_70.437.2	At-AT2G42280.3.Araport11.447		Cp-evm.model.scaffold_155.80	Os-LOC_Os03g58330.1.MSUv7.0		Cp-evm.model.scaffold_70.358	Pp-Potri.009G081400.1.v4.1		Cp-evm.model.scaffold_70.437.2	Vv-VIT_213s0064g01290.1.v2.1
Cp-evm.model.scaffold_801.44	At-AT4G29930.3.Araport11.447		Cp-evm.model.scaffold_727.16	Os-LOC_Os02g52190.1.MSUv7.0		Cp-evm.model.scaffold_70.335	Pp-Potri.002G114700.1.v4.1		Cp-evm.model.scaffold_70.437.2	Vv-VIT_206s0004g01740.1.v2.1
Cp-evm.model.scaffold_801.44	At-AT5G57150.4.Araport11.447		Cp-evm.model.scaffold_727.16	Os-LOC_Os03g08930.1.MSUv7.0		Cp-evm.model.scaffold_70.367	Pp-Potri.002G108400.1.v4.1		Cp-evm.model.scaffold_70.437.2	Vv-VIT_208s0007g07810.1.v2.1
Cp-evm.model.scaffold_23.121	At-AT2G43140.2.Araport11.447		Cp-evm.model.scaffold_24.32_evm.model.scaffold_24.33	Os-LOC_Os08g38210.1.MSUv7.0		Cp-evm.model.scaffold_70.437.2	Pp-Potri.001G017300.9.v4.1		Cp-evm.model.scaffold_801.44	Vv-VIT_211s0052g00100.1.v2.1
Cp-evm.model.scaffold_89.14	At-AT3G26744.2.Araport11.447		Cp-evm.model.scaffold_90.277	Os-LOC_Os08g42470.1.MSUv7.0		Cp-evm.model.scaffold_70.437.2	Pp-Potri.003G207200.3.v4.1		Cp-evm.model.scaffold_155.80	Vv-VIT_214s0030g02230.2.v2.1
Cp-evm.model.scaffold_90.277	At-AT5G50915.2.Araport11.447		Cp-evm.model.scaffold_90.277	Os-LOC_Os09g33580.2.MSUv7.0		Cp-evm.model.scaffold_70.437.2	Pp-Potri.006G057600.2.v4.1		Cp-evm.model.scaffold_155.80	Vv-VIT_205s0020g04620.1.v2.1
Cp-evm.model.scaffold_90.135	At-AT3G07340.1.Araport11.447		Cp-evm.model.scaffold_90.135	Os-LOC_Os01g68700.1.MSUv7.0		Cp-evm.model.scaffold_70.437.2	Pp-Potri.009G064700.5.v4.1		Cp-evm.model.scaffold_155.80	Vv-VIT_207s0141g00220.1.v2.1
Cp-evm.model.scaffold_90.135	At-AT3G23690.1.Araport11.447		Cp-evm.model.scaffold_90.135	Os-LOC_Os08g41320.1.MSUv7.0		Cp-evm.model.scaffold_70.437.2	Pp-Potri.016G050500.1.v4.1		Cp-evm.model.scaffold_727.16	Vv-VIT_218s0001g06650.1.v2.1
Cp-evm.model.scaffold_145.109	At-AT3G07340.1.Araport11.447		Cp-evm.model.scaffold_18.277	Os-LOC_Os03g10770.1.MSUv7.0		Cp-evm.model.scaffold_801.44	Pp-Potri.006G074900.6.v4.1		Cp-evm.model.scaffold_24.277	Vv-VIT_212s0028g03550.1.v2.1
Cp-evm.model.scaffold_18.277	At-AT1G27740.1.Araport11.447		Cp-evm.model.scaffold_18.277	Os-LOC_Os07g39940.1.MSUv7.0		Cp-evm.model.scaffold_801.44	Pp-Potri.018G141500.2.v4.1		Cp-evm.model.scaffold_24.32_evm.model.scaffold_24.33	Vv-VIT_214s0083g00930.1.v2.1
Cp-evm.model.scaffold_18.277	At-AT2G14760.3.Araport11.447		Cp-evm.model.scaffold_18.530	Os-LOC_Os03g58830.1.MSUv7.0		Cp-evm.model.scaffold_155.80	Pp-Potri.002G045400.1.v4.1		Cp-evm.model.scaffold_89.14	Vv-VIT_214s0068g01200.1.v2.1
Cp-evm.model.scaffold_18.355	At-AT5G65640.1.Araport11.447		Cp-evm.model.scaffold_18.431	Os-LOC_Os08g39630.1.MSUv7.0		Cp-evm.model.scaffold_155.80	Pp-Potri.005G217800.1.v4.1		Cp-evm.model.scaffold_90.277	Vv-VIT_217s0000g00430.1.v2.1
Cp-evm.model.scaffold_18.167	At-AT5G67110.1.Araport11.447		Cp-evm.model.scaffold_18.431	Os-LOC_Os09g31300.1.MSUv7.0		Cp-evm.model.scaffold_155.80	Pp-Potri.005G053500.1.v4.1		Cp-evm.model.scaffold_18.277	Vv-VIT_218s0001g09210.1.v2.1
Cp-evm.model.scaffold_18.346	At-AT2G22750.3.Araport11.447		Cp-evm.model.scaffold_18.346	Os-LOC_Os03g51580.1.MSUv7.0		Cp-evm.model.scaffold_155.80	Pp-Potri.013G041000.1.v4.1		Cp-evm.model.scaffold_18.277	Vv-VIT_203s0091g00730.1.v2.1
Cp-evm.model.scaffold_18.346	At-AT4G37850.2.Araport11.447		Cp-evm.model.scaffold_13.38	Os-LOC_Os04g52770.1.MSUv7.0		Cp-evm.model.scaffold_727.16	Pp-Potri.002G101900.1.v4.1		Cp-evm.model.scaffold_18.355	Vv-VIT_218s0001g08040.1.v2.1
Cp-evm.model.scaffold_55.138	At-AT2G16910.1.Araport11.447		Cp-evm.model.scaffold_59.62	Os-LOC_Os12g41650.2.MSUv7.0		Cp-evm.model.scaffold_24.32_evm.model.scaffold_24.33	Pp-Potri.010G137600.2.v4.1		Cp-evm.model.scaffold_18.431	Vv-VIT_213s0064g01290.1.v2.1
Cp-evm.model.scaffold_174.7	At-AT5G46690.1.Araport11.447		Cp-evm.model.scaffold_59.62	Os-LOC_Os03g56950.2.MSUv7.0		Cp-evm.model.scaffold_90.277	Pp-Potri.012G104900.1.v4.1		Cp-evm.model.scaffold_18.431	Vv-VIT_206s0004g01740.1.v2.1
Cp-evm.model.scaffold_92.17	At-AT4G30980.2.Araport11.447		Cp-evm.model.scaffold_59.62	Os-LOC_Os03g43810.1.MSUv7.0		Cp-evm.model.scaffold_90.277	Pp-Potri.015G104200.4.v4.1		Cp-evm.model.scaffold_18.431	Vv-VIT_208s0007g07810.1.v2.1
Cp-evm.model.scaffold_954.48.4	At-AT1G09530.1.Araport11.447		Cp-evm.model.scaffold_174.7	Os-LOC_Os02g46560.1.MSUv7.0		Cp-evm.model.scaffold_90.135	Pp-Potri.002G248500.1.v4.1		Cp-evm.model.scaffold_18.167	Vv-VIT_218s0001g10270.1.v2.1
Cp-evm.model.scaffold_128.104	At-AT5G53210.1.Araport11.447		Cp-evm.model.scaffold_174.7	Os-LOC_Os04g50090.1.MSUv7.0		Cp-evm.model.scaffold_90.135	Pp-Potri.002G235400.1.v4.1		Cp-evm.model.scaffold_18.167	Vv-VIT_207s0031g00450.1.v2.1
Cp-evm.model.scaffold_86.2	At-AT4G17880.1.Araport11.447		Cp-evm.model.scaffold_92.303	Os-LOC_Os06g09370.2.MSUv7.0		Cp-evm.model.scaffold_90.135	Pp-Potri.014G148900.2.v4.1		Cp-evm.model.scaffold_47.115	Vv-VIT_208s0040g01240.1.v2.1
Cp-evm.model.scaffold_86.2	At-AT5G46760.1.Araport11.447		Cp-evm.model.scaffold_92.17	Os-LOC_Os02g55250.1.MSUv7.0		Cp-evm.model.scaffold_145.109	Pp-Potri.002G248500.1.v4.1		Cp-evm.model.scaffold_55.138	Vv-VIT_203s0038g02540.1.v2.1
Cp-evm.model.scaffold_86.256	At-AT4G00050.1.Araport11.447		Cp-evm.model.scaffold_907.22	Os-LOC_Os03g58330.1.MSUv7.0		Cp-evm.model.scaffold_18.277	Pp-Potri.002G119200.2.v4.1		Cp-evm.model.scaffold_40.60	Vv-VIT_201s0011g03720.1.v2.1
Cp-evm.model.scaffold_86.142	At-AT2G46810.1.Araport11.447		Cp-evm.model.scaffold_907.22	Os-LOC_Os07g08440.1.MSUv7.0		Cp-evm.model.scaffold_18.277	Pp-Potri.009G089000.1.v4.1		Cp-evm.model.scaffold_40.60	Vv-VIT_214s0006g02850.1.v2.1
Cp-evm.model.scaffold_86.142	At-AT3G61950.1.Araport11.447		Cp-evm.model.scaffold_954.48.4	Os-LOC_Os05g04740.2.MSUv7.0		Cp-evm.model.scaffold_18.277	Pp-Potri.014G017100.1.v4.1		Cp-evm.model.scaffold_40.60	Vv-VIT_217s0000g03580.1.v2.1
Cp-evm.model.scaffold_797.37	At-AT4G21340.1.Araport11.447		Cp-evm.model.scaffold_86.2	Os-LOC_Os10g42430.1.MSUv7.0		Cp-evm.model.scaffold_18.355	Pp-Potri.002G108400.1.v4.1		Cp-evm.model.scaffold_13.23	Vv-VIT_210s0092g00030.1.v2.1
Cp-evm.model.scaffold_250.23	At-AT5G57150.4.Araport11.447		Cp-evm.model.scaffold_86.256	Os-LOC_Os10g40740.1.MSUv7.0		Cp-evm.model.scaffold_18.431	Pp-Potri.001G270000.3.v4.1		Cp-evm.model.scaffold_174.7	Vv-VIT_202s0012g01450.1.v2.1
Cp-evm.model.scaffold_176.125	At-AT1G63650.3.Araport11.447		Cp-evm.model.scaffold_9.22	Os-LOC_Os03g10770.1.MSUv7.0		Cp-evm.model.scaffold_18.431	Pp-Potri.001G017300.9.v4.1		Cp-evm.model.scaffold_92.303	Vv-VIT_211s0016g00380.3.v2.1
Cp-evm.model.scaffold_752.25	At-AT4G30980.2.Araport11.447		Cp-evm.model.scaffold_9.22	Os-LOC_Os07g39940.1.MSUv7.0		Cp-evm.model.scaffold_18.431	Pp-Potri.003G207200.3.v4.1		Cp-evm.model.scaffold_92.17	Vv-VIT_211s0037g00040.1.v2.1
Cp-evm.model.scaffold_752.25	At-AT5G58010.1.Araport11.447		Cp-evm.model.scaffold_797.37	Os-LOC_Os01g57580.1.MSUv7.0		Cp-evm.model.scaffold_18.431	Pp-Potri.009G064700.5.v4.1		Cp-evm.model.scaffold_907.22	Vv-VIT_214s0030g02230.2.v2.1
Cp-evm.model.scaffold_178.12.1	At-AT3G07340.1.Araport11.447		Cp-evm.model.scaffold_32.108	Os-LOC_Os03g51910.1.MSUv7.0		Cp-evm.model.scaffold_18.431	Pp-Potri.016G050500.1.v4.1		Cp-evm.model.scaffold_907.22	Vv-VIT_205s0020g04620.1.v2.1
Cp-evm.model.scaffold_178.12.1	At-AT5G48560.1.Araport11.447		Cp-evm.model.scaffold_855.53	Os-LOC_Os06g37410.1.MSUv7.0		Cp-evm.model.scaffold_18.167	Pp-Potri.002G124400.1.v4.1		Cp-evm.model.scaffold_907.22	Vv-VIT_207s0141g00220.1.v2.1
Cp-evm.model.scaffold_178.166	At-AT5G50915.2.Araport11.447		Cp-evm.model.scaffold_855.88	Os-LOC_Os01g51140.1.MSUv7.0		Cp-evm.model.scaffold_18.167	Pp-Potri.005G139700.2.v4.1		Cp-evm.model.scaffold_954.48.4	Vv-VIT_214s0060g00260.3.v2.1
Cp-evm.model.scaffold_153.244	At-AT2G46810.1.Araport11.447		Cp-evm.model.scaffold_865.209	Os-LOC_Os08g36740.1.MSUv7.0		Cp-evm.model.scaffold_18.167	Pp-Potri.014G025800.1.v4.1		Cp-evm.model.scaffold_954.48.4	Vv-VIT_207s0005g02510.3.v2.1
Cp-evm.model.scaffold_153.244	At-AT4G01460.1.Araport11.447		Cp-evm.model.scaffold_865.209	Os-LOC_Os09g28210.1.MSUv7.0		Cp-evm.model.scaffold_18.346	Pp-Potri.001G287200.1.v4.1		Cp-evm.model.scaffold_128.104	Vv-VIT_216s0050g02500.1.v2.1
Cp-evm.model.scaffold_153.56	At-AT1G05805.1.Araport11.447		Cp-evm.model.scaffold_865.282.1	Os-LOC_Os02g52190.1.MSUv7.0		Cp-evm.model.scaffold_18.346	Pp-Potri.007G009400.4.v4.1		Cp-evm.model.scaffold_86.2	Vv-VIT_202s0012g01320.1.v2.1
Cp-evm.model.scaffold_130.76	At-AT3G26744.2.Araport11.447		Cp-evm.model.scaffold_865.282.1	Os-LOC_Os03g08930.1.MSUv7.0		Cp-evm.model.scaffold_18.346	Pp-Potri.009G081400.1.v4.1		Cp-evm.model.scaffold_86.256	Vv-VIT_215s0021g02690.1.v2.1
Cp-evm.model.scaffold_742.133	At-AT2G18300.3.Araport11.447		Cp-evm.model.scaffold_5.167	Os-LOC_Os06g37410.1.MSUv7.0		Cp-evm.model.scaffold_47.115	Pp-Potri.016G035400.1.v4.1		Cp-evm.model.scaffold_86.142	Vv-VIT_215s0048g02510.2.v2.1
Cp-evm.model.scaffold_742.133	At-AT4G34530.1.Araport11.447		Cp-evm.model.scaffold_5.11	Os-LOC_Os02g49480.1.MSUv7.0		Cp-evm.model.scaffold_55.138	Pp-Potri.009G136300.1.v4.1		Cp-evm.model.scaffold_9.22	Vv-VIT_218s0001g09210.1.v2.1
Cp-evm.model.scaffold_179.88	At-AT2G42280.3.Araport11.447		Cp-evm.model.scaffold_5.11	Os-LOC_Os08g38210.1.MSUv7.0		Cp-evm.model.scaffold_40.60	Pp-Potri.004G099400.2.v4.1		Cp-evm.model.scaffold_9.22	Vv-VIT_203s0091g00730.1.v2.1
Cp-evm.model.scaffold_117.205.4	At-AT1G09530.1.Araport11.447		Cp-evm.model.scaffold_752.25	Os-LOC_Os02g55250.1.MSUv7.0		Cp-evm.model.scaffold_40.60	Pp-Potri.012G055700.1.v4.1		Cp-evm.model.scaffold_797.37	Vv-VIT_219s0014g04670.2.v2.1
Cp-evm.model.scaffold_117.205.4	At-AT2G46970.1.Araport11.447		Cp-evm.model.scaffold_752.25	Os-LOC_Os06g08500.1.MSUv7.0		Cp-evm.model.scaffold_40.60	Pp-Potri.015G046300.1.v4.1		Cp-evm.model.scaffold_250.23	Vv-VIT_211s0052g00100.1.v2.1
Cp-evm.model.scaffold_118.460	At-AT2G16910.1.Araport11.447		Cp-evm.model.scaffold_752.25	Os-LOC_Os09g25040.1.MSUv7.0		Cp-evm.model.scaffold_40.60	Pp-Potri.017G115300.1.v4.1		Cp-evm.model.scaffold_17.7	Vv-VIT_205s0049g00460.2.v2.1
Cp-evm.model.scaffold_35.39	At-AT1G68920.4.Araport11.447		Cp-evm.model.scaffold_178.12.1	Os-LOC_Os01g68700.1.MSUv7.0		Cp-evm.model.scaffold_174.7	Pp-Potri.001G141100.1.v4.1		Cp-evm.model.scaffold_32.108	Vv-VIT_218s0001g08600.1.v2.1
Cp-evm.model.scaffold_35.57	At-AT1G69010.1.Araport11.447		Cp-evm.model.scaffold_178.12.1	Os-LOC_Os08g41320.1.MSUv7.0		Cp-evm.model.scaffold_174.7	Pp-Potri.003G093200.1.v4.1		Cp-evm.model.scaffold_865.209	Vv-VIT_218s0001g10400.1.v2.1
Cp-evm.model.scaffold_141.209	At-AT4G21340.1.Araport11.447		Cp-evm.model.scaffold_178.12.1	Os-LOC_Os09g32510.1.MSUv7.0		Cp-evm.model.scaffold_92.303	Pp-Potri.006G135600.3.v4.1		Cp-evm.model.scaffold_865.209	Vv-VIT_207s0031g00550.1.v2.1
Cp-evm.model.scaffold_12.416	At-AT3G57800.1.Araport11.447		Cp-evm.model.scaffold_178.166	Os-LOC_Os08g42470.1.MSUv7.0		Cp-evm.model.scaffold_907.22	Pp-Potri.002G045400.1.v4.1		Cp-evm.model.scaffold_865.282.1	Vv-VIT_218s0001g06650.1.v2.1
Cp-evm.model.scaffold_12.249	At-AT1G22490.2.Araport11.447		Cp-evm.model.scaffold_153.139	Os-LOC_Os04g50090.1.MSUv7.0		Cp-evm.model.scaffold_907.22	Pp-Potri.005G217800.1.v4.1		Cp-evm.model.scaffold_752.25	Vv-VIT_211s0037g00040.1.v2.1
Cp-evm.model.scaffold_12.249	At-AT5G65320.1.Araport11.447		Cp-evm.model.scaffold_153.56	Os-LOC_Os01g67480.1.MSUv7.0		Cp-evm.model.scaffold_907.22	Pp-Potri.005G053500.1.v4.1		Cp-evm.model.scaffold_178.166	Vv-VIT_217s0000g00430.1.v2.1
Cp-evm.model.scaffold_147.125	At-AT2G18300.3.Araport11.447		Cp-evm.model.scaffold_153.56	Os-LOC_Os02g39140.1.MSUv7.0		Cp-evm.model.scaffold_907.22	Pp-Potri.013G041000.1.v4.1		Cp-evm.model.scaffold_153.356	Vv-VIT_205s0020g04780.1.v2.1
Cp-evm.model.scaffold_96.505	At-AT1G22490.2.Araport11.447		Cp-evm.model.scaffold_108.51	Os-LOC_Os04g51070.1.MSUv7.0		Cp-evm.model.scaffold_954.48.4	Pp-Potri.005G001800.1.v4.1		Cp-evm.model.scaffold_153.244	Vv-VIT_215s0048g02510.2.v2.1
Cp-evm.model.scaffold_96.505	At-AT5G65320.1.Araport11.447		Cp-evm.model.scaffold_130.76	Os-LOC_Os01g70310.2.MSUv7.0		Cp-evm.model.scaffold_954.48.4	Pp-Potri.013G001300.4.v4.1		Cp-evm.model.scaffold_153.430	Vv-VIT_216s0050g02500.1.v2.1
Cp-evm.model.scaffold_8.109	At-AT2G22750.3.Araport11.447		Cp-evm.model.scaffold_130.76	Os-LOC_Os11g32100.1.MSUv7.0		Cp-evm.model.scaffold_954.48.4	Pp-Potri.014G111400.1.v4.1		Cp-evm.model.scaffold_153.587	Vv-VIT_210s0003g01160.1.v2.1
Cp-evm.model.scaffold_8.109	At-AT4G37850.2.Araport11.447		Cp-evm.model.scaffold_26.180	Os-LOC_Os01g02110.1.MSUv7.0		Cp-evm.model.scaffold_128.104	Pp-Potri.012G031800.1.v4.1		Cp-evm.model.scaffold_153.587	Vv-VIT_212s0028g02350.1.v2.1
Cp-evm.model.scaffold_74.30_evm.model.scaffold_74.31	At-AT5G54680.1.Araport11.447		Cp-evm.model.scaffold_26.180	Os-LOC_Os02g48060.1.MSUv7.0		Cp-evm.model.scaffold_128.104	Pp-Potri.015G022300.3.v4.1		Cp-evm.model.scaffold_130.76	Vv-VIT_214s0068g01200.1.v2.1
Cp-evm.model.scaffold_55.254	At-AT1G26945.1.Araport11.447		Cp-evm.model.scaffold_26.342	Os-LOC_Os12g41650.2.MSUv7.0		Cp-evm.model.scaffold_86.2	Pp-Potri.001G142200.1.v4.1		Cp-evm.model.scaffold_130.76	Vv-VIT_217s0000g00330.1.v2.1
Cp-evm.model.scaffold_55.254	At-AT3G28857.1.Araport11.447		Cp-evm.model.scaffold_26.342	Os-LOC_Os03g43810.1.MSUv7.0		Cp-evm.model.scaffold_86.2	Pp-Potri.003G092200.1.v4.1		Cp-evm.model.scaffold_742.240	Vv-VIT_217s0000g08150.1.v2.1
Cp-evm.model.scaffold_55.254	At-AT3G47710.1.Araport11.447		Cp-evm.model.scaffold_26.342	Os-LOC_Os03g56950.2.MSUv7.0		Cp-evm.model.scaffold_86.256	Pp-Potri.002G143300.1.v4.1		Cp-evm.model.scaffold_742.158.2	Vv-VIT_218s0001g12970.2.v2.1
Cp-evm.model.scaffold_55.254	At-AT5G39860.1.Araport11.447		Cp-evm.model.scaffold_26.342	Os-LOC_Os07g05010.2.MSUv7.0		Cp-evm.model.scaffold_86.256	Pp-Potri.014G066500.1.v4.1		Cp-evm.model.scaffold_742.133	Vv-VIT_203s0038g04760.1.v2.1
Cp-evm.model.scaffold_96.612	At-AT3G47710.1.Araport11.447		Cp-evm.model.scaffold_26.162	Os-LOC_Os01g01840.1.MSUv7.0		Cp-evm.model.scaffold_86.142	Pp-Potri.002G180300.2.v4.1		Cp-evm.model.scaffold_742.133	Vv-VIT_204s0023g01930.1.v2.1
Cp-evm.model.scaffold_96.612	At-AT5G39860.1.Araport11.447		Cp-evm.model.scaffold_179.198.1	Os-LOC_Os03g58830.1.MSUv7.0		Cp-evm.model.scaffold_86.142	Pp-Potri.014G106300.1.v4.1		Cp-evm.model.scaffold_179.198.1	Vv-VIT_201s0026g01140.1.v2.1
Cp-evm.model.scaffold_865.617	At-AT4G05170.1.Araport11.447		Cp-evm.model.scaffold_179.285	Os-LOC_Os01g38610.1.MSUv7.0		Cp-evm.model.scaffold_9.22	Pp-Potri.002G119200.2.v4.1		Cp-evm.model.scaffold_179.198.1	Vv-VIT_217s0000g05370.1.v2.1
Cp-evm.model.scaffold_865.617	At-AT4G21340.1.Araport11.447		Cp-evm.model.scaffold_179.88	Os-LOC_Os08g39630.1.MSUv7.0		Cp-evm.model.scaffold_9.22	Pp-Potri.009G089000.1.v4.1		Cp-evm.model.scaffold_179.88	Vv-VIT_213s0064g01290.1.v2.1
			Cp-evm.model.scaffold_179.88	Os-LOC_Os09g31300.1.MSUv7.0		Cp-evm.model.scaffold_9.22	Pp-Potri.014G017100.1.v4.1		Cp-evm.model.scaffold_179.88	Vv-VIT_206s0004g01740.1.v2.1
			Cp-evm.model.scaffold_117.425	Os-LOC_Os02g48060.1.MSUv7.0		Cp-evm.model.scaffold_797.37	Pp-Potri.001G410600.2.v4.1		Cp-evm.model.scaffold_179.88	Vv-VIT_208s0007g07810.1.v2.1
			Cp-evm.model.scaffold_117.425	Os-LOC_Os06g30090.1.MSUv7.0		Cp-evm.model.scaffold_797.37	Pp-Potri.004G029100.1.v4.1		Cp-evm.model.scaffold_117.205.4	Vv-VIT_214s0060g00260.3.v2.1
			Cp-evm.model.scaffold_35.39	Os-LOC_Os08g38080.1.MSUv7.0		Cp-evm.model.scaffold_797.37	Pp-Potri.011G033000.3.v4.1		Cp-evm.model.scaffold_117.205.4	Vv-VIT_207s0005g02510.3.v2.1
			Cp-evm.model.scaffold_35.39	Os-LOC_Os09g29830.1.MSUv7.0		Cp-evm.model.scaffold_797.37	Pp-Potri.011G129500.2.v4.1		Cp-evm.model.scaffold_118.460	Vv-VIT_203s0038g02540.1.v2.1
			Cp-evm.model.scaffold_35.57	Os-LOC_Os02g49480.1.MSUv7.0		Cp-evm.model.scaffold_250.23	Pp-Potri.006G074900.6.v4.1		Cp-evm.model.scaffold_52.293	Vv-VIT_201s0011g03720.1.v2.1
			Cp-evm.model.scaffold_35.57	Os-LOC_Os08g38210.1.MSUv7.0		Cp-evm.model.scaffold_250.23	Pp-Potri.018G141500.2.v4.1		Cp-evm.model.scaffold_52.293	Vv-VIT_214s0006g02850.1.v2.1
			Cp-evm.model.scaffold_35.57	Os-LOC_Os09g29930.1.MSUv7.0		Cp-evm.model.scaffold_176.125	Pp-Potri.001G103600.2.v4.1		Cp-evm.model.scaffold_52.293	Vv-VIT_217s0000g03580.1.v2.1
			Cp-evm.model.scaffold_162.11	Os-LOC_Os01g11910.1.MSUv7.0		Cp-evm.model.scaffold_176.125	Pp-Potri.002G159400.1.v4.1		Cp-evm.model.scaffold_35.39	Vv-VIT_201s0010g00740.1.v2.1
			Cp-evm.model.scaffold_162.478	Os-LOC_Os10g40740.1.MSUv7.0		Cp-evm.model.scaffold_17.7	Pp-Potri.008G165700.2.v4.1		Cp-evm.model.scaffold_35.57	Vv-VIT_214s0083g00930.1.v2.1
			Cp-evm.model.scaffold_141.209	Os-LOC_Os05g42180.1.MSUv7.0		Cp-evm.model.scaffold_17.7	Pp-Potri.010G072900.1.v4.1		Cp-evm.model.scaffold_35.57	Vv-VIT_217s0000g04790.1.v2.1
			Cp-evm.model.scaffold_12.249	Os-LOC_Os02g52190.1.MSUv7.0		Cp-evm.model.scaffold_32.108	Pp-Potri.002G114700.1.v4.1		Cp-evm.model.scaffold_162.11	Vv-VIT_210s0003g01160.1.v2.1
			Cp-evm.model.scaffold_12.249	Os-LOC_Os08g37730.1.MSUv7.0		Cp-evm.model.scaffold_865.209	Pp-Potri.002G125000.1.v4.1		Cp-evm.model.scaffold_162.11	Vv-VIT_212s0028g02350.1.v2.1
			Cp-evm.model.scaffold_12.223	Os-LOC_Os08g37290.1.MSUv7.0		Cp-evm.model.scaffold_865.209	Pp-Potri.005G138900.1.v4.1		Cp-evm.model.scaffold_162.154	Vv-VIT_215s0048g02510.2.v2.1
			Cp-evm.model.scaffold_12.223	Os-LOC_Os09g28900.1.MSUv7.0		Cp-evm.model.scaffold_865.209	Pp-Potri.007G044600.1.v4.1		Cp-evm.model.scaffold_141.209	Vv-VIT_219s0014g04670.2.v2.1
			Cp-evm.model.scaffold_122.148	Os-LOC_Os04g41570.2.MSUv7.0		Cp-evm.model.scaffold_865.209	Pp-Potri.014G027300.1.v4.1		Cp-evm.model.scaffold_12.416	Vv-VIT_208s0007g07870.1.v2.1
			Cp-evm.model.scaffold_96.505	Os-LOC_Os03g08930.1.MSUv7.0		Cp-evm.model.scaffold_865.282.1	Pp-Potri.002G101900.1.v4.1		Cp-evm.model.scaffold_12.249	Vv-VIT_218s0001g06650.1.v2.1
			Cp-evm.model.scaffold_96.505	Os-LOC_Os08g37730.1.MSUv7.0		Cp-evm.model.scaffold_5.167	Pp-Potri.006G148800.2.v4.1		Cp-evm.model.scaffold_12.249	Vv-VIT_207s0191g00240.1.v2.1
			Cp-evm.model.scaffold_8.109	Os-LOC_Os03g51580.1.MSUv7.0		Cp-evm.model.scaffold_752.25	Pp-Potri.006G186600.1.v4.1		Cp-evm.model.scaffold_12.223	Vv-VIT_218s0001g07410.1.v2.1
			Cp-evm.model.scaffold_8.109	Os-LOC_Os03g46860.1.MSUv7.0		Cp-evm.model.scaffold_752.25	Pp-Potri.018G109500.1.v4.1		Cp-evm.model.scaffold_122.148	Vv-VIT_205s0094g00480.3.v2.1
			Cp-evm.model.scaffold_74.30_evm.model.scaffold_74.31	Os-LOC_Os07g35870.1.MSUv7.0		Cp-evm.model.scaffold_178.12.1	Pp-Potri.002G235400.1.v4.1		Cp-evm.model.scaffold_1094.29	Vv-VIT_218s0001g08040.1.v2.1
			Cp-evm.model.scaffold_55.254	Os-LOC_Os03g07540.1.MSUv7.0		Cp-evm.model.scaffold_178.12.1	Pp-Potri.002G248500.1.v4.1		Cp-evm.model.scaffold_147.57	Vv-VIT_218s0001g12970.2.v2.1
			Cp-evm.model.scaffold_55.254	Os-LOC_Os04g54900.1.MSUv7.0		Cp-evm.model.scaffold_178.12.1	Pp-Potri.014G148900.2.v4.1		Cp-evm.model.scaffold_147.57	Vv-VIT_204s0023g02410.1.v2.1
			Cp-evm.model.scaffold_96.612	Os-LOC_Os04g54900.1.MSUv7.0		Cp-evm.model.scaffold_178.166	Pp-Potri.012G104900.1.v4.1		Cp-evm.model.scaffold_147.125	Vv-VIT_203s0038g04760.1.v2.1
			Cp-lmgene17771.t1	Os-LOC_Os10g42430.1.MSUv7.0		Cp-evm.model.scaffold_178.166	Pp-Potri.015G104200.4.v4.1		Cp-evm.model.scaffold_147.125	Vv-VIT_204s0023g01930.1.v2.1
			Cp-lmgene11587.t1	Os-LOC_Os01g13460.1.MSUv7.0		Cp-evm.model.scaffold_153.356	Pp-Potri.008G161800.3.v4.1		Cp-evm.model.scaffold_96.505	Vv-VIT_218s0001g06650.1.v2.1
			Cp-evm.model.scaffold_865.617	Os-LOC_Os01g57580.1.MSUv7.0		Cp-evm.model.scaffold_153.356	Pp-Potri.010G077000.4.v4.1		Cp-evm.model.scaffold_96.505	Vv-VIT_207s0191g00240.1.v2.1
			Cp-evm.model.scaffold_727.50	Os-LOC_Os09g28900.1.MSUv7.0		Cp-evm.model.scaffold_153.244	Pp-Potri.002G180300.2.v4.1		Cp-evm.model.scaffold_8.109	Vv-VIT_203s0088g01240.1.v2.1
						Cp-evm.model.scaffold_153.244	Pp-Potri.014G106300.1.v4.1		Cp-evm.model.scaffold_74.30_evm.model.scaffold_74.31	Vv-VIT_212s0059g02650.1.v2.1
						Cp-evm.model.scaffold_153.430	Pp-Potri.015G022300.3.v4.1		Cp-evm.model.scaffold_74.30_evm.model.scaffold_74.31	Vv-VIT_219s0014g05100.1.v2.1
						Cp-evm.model.scaffold_153.139	Pp-Potri.001G141100.1.v4.1		Cp-evm.model.scaffold_138.9	Vv-VIT_213s0067g01350.1.v2.1
						Cp-evm.model.scaffold_153.587	Pp-Potri.004G055700.1.v4.1		Cp-evm.model.scaffold_118.330	Vv-VIT_201s0026g02030.1.v2.1
						Cp-evm.model.scaffold_153.587	Pp-Potri.011G065500.1.v4.1		Cp-evm.model.scaffold_55.254	Vv-VIT_201s0026g02030.1.v2.1
						Cp-evm.model.scaffold_130.76	Pp-Potri.012G106000.1.v4.1		Cp-evm.model.scaffold_55.254	Vv-VIT_214s0108g00420.1.v2.1
						Cp-evm.model.scaffold_130.76	Pp-Potri.015G105200.1.v4.1		Cp-evm.model.scaffold_55.254	Vv-VIT_217s0000g05900.1.v2.1
						Cp-evm.model.scaffold_742.240	Pp-Potri.015G074500.1.v4.1		Cp-evm.model.scaffold_96.612	Vv-VIT_201s0026g02030.1.v2.1
						Cp-evm.model.scaffold_742.158.2	Pp-Potri.002G032400.1.v4.1		Cp-evm.model.scaffold_96.612	Vv-VIT_214s0108g00420.1.v2.1
						Cp-evm.model.scaffold_742.158.2	Pp-Potri.005G119601.1.v4.1		Cp-evm.model.scaffold_96.612	Vv-VIT_217s0000g05900.1.v2.1
						Cp-evm.model.scaffold_742.158.2	Pp-Potri.005G230800.8.v4.1		Cp-lmgene11587.t1	Vv-VIT_215s0046g00320.1.v2.1
						Cp-evm.model.scaffold_742.158.2	Pp-Potri.007G020200.2.v4.1		Cp-evm.model.scaffold_865.617	Vv-VIT_219s0014g04670.2.v2.1
						Cp-evm.model.scaffold_742.133	Pp-Potri.004G156000.2.v4.1		Cp-evm.model.scaffold_727.50	Vv-VIT_218s0001g07410.1.v2.1
						Cp-evm.model.scaffold_742.133	Pp-Potri.005G121850.4.v4.1
						Cp-evm.model.scaffold_742.133	Pp-Potri.007G023600.1.v4.1
						Cp-evm.model.scaffold_742.133	Pp-Potri.009G117300.1.v4.1
						Cp-evm.model.scaffold_26.162	Pp-Potri.012G079100.1.v4.1
						Cp-evm.model.scaffold_26.162	Pp-Potri.015G074500.1.v4.1
						Cp-evm.model.scaffold_179.198.1	Pp-Potri.012G072700.1.v4.1
						Cp-evm.model.scaffold_179.198.1	Pp-Potri.015G068100.1.v4.1
						Cp-evm.model.scaffold_179.285	Pp-Potri.001G191800.1.v4.1
						Cp-evm.model.scaffold_179.88	Pp-Potri.001G270000.3.v4.1
						Cp-evm.model.scaffold_179.88	Pp-Potri.001G017300.9.v4.1
						Cp-evm.model.scaffold_179.88	Pp-Potri.003G207200.3.v4.1
						Cp-evm.model.scaffold_179.88	Pp-Potri.009G064700.5.v4.1
						Cp-evm.model.scaffold_179.88	Pp-Potri.016G050500.1.v4.1
						Cp-evm.model.scaffold_117.205.4	Pp-Potri.005G001800.1.v4.1
						Cp-evm.model.scaffold_117.205.4	Pp-Potri.013G001300.4.v4.1
						Cp-evm.model.scaffold_117.205.4	Pp-Potri.014G111400.1.v4.1
						Cp-evm.model.scaffold_118.131	Pp-Potri.005G060900.2.v4.1
						Cp-evm.model.scaffold_118.131	Pp-Potri.007G108000.2.v4.1
						Cp-evm.model.scaffold_118.460	Pp-Potri.009G136300.1.v4.1
						Cp-evm.model.scaffold_52.293	Pp-Potri.004G099400.2.v4.1
						Cp-evm.model.scaffold_52.293	Pp-Potri.012G055700.1.v4.1
						Cp-evm.model.scaffold_52.293	Pp-Potri.015G046300.1.v4.1
						Cp-evm.model.scaffold_52.293	Pp-Potri.017G115300.1.v4.1
						Cp-evm.model.scaffold_35.39	Pp-Potri.008G113200.1.v4.1
						Cp-evm.model.scaffold_35.39	Pp-Potri.010G136100.1.v4.1
						Cp-evm.model.scaffold_35.57	Pp-Potri.008G112000.2.v4.1
						Cp-evm.model.scaffold_35.57	Pp-Potri.010G137600.2.v4.1
						Cp-evm.model.scaffold_162.11	Pp-Potri.004G055700.1.v4.1
						Cp-evm.model.scaffold_162.11	Pp-Potri.011G065500.1.v4.1
						Cp-evm.model.scaffold_162.11	Pp-Potri.013G117600.1.v4.1
						Cp-evm.model.scaffold_162.11	Pp-Potri.019G089000.1.v4.1
						Cp-evm.model.scaffold_162.478	Pp-Potri.002G143300.1.v4.1
						Cp-evm.model.scaffold_162.154	Pp-Potri.002G180300.2.v4.1
						Cp-evm.model.scaffold_162.154	Pp-Potri.014G106300.1.v4.1
						Cp-evm.model.scaffold_141.209	Pp-Potri.001G410600.2.v4.1
						Cp-evm.model.scaffold_141.209	Pp-Potri.004G029100.1.v4.1
						Cp-evm.model.scaffold_141.209	Pp-Potri.011G033000.3.v4.1
						Cp-evm.model.scaffold_141.209	Pp-Potri.011G129500.2.v4.1
						Cp-evm.model.scaffold_12.416	Pp-Potri.006G057200.2.v4.1
						Cp-evm.model.scaffold_12.416	Pp-Potri.009G117300.1.v4.1
						Cp-evm.model.scaffold_12.416	Pp-Potri.016G051100.1.v4.1
						Cp-evm.model.scaffold_12.249	Pp-Potri.002G101900.1.v4.1
						Cp-evm.model.scaffold_12.249	Pp-Potri.005G071100.1.v4.1
						Cp-evm.model.scaffold_12.249	Pp-Potri.007G097600.6.v4.1
						Cp-evm.model.scaffold_12.223	Pp-Potri.002G105300.1.v4.1
						Cp-evm.model.scaffold_1094.29	Pp-Potri.002G108400.1.v4.1
						Cp-evm.model.scaffold_577.3	Pp-Potri.005G053500.1.v4.1
						Cp-evm.model.scaffold_577.3	Pp-Potri.013G041000.1.v4.1
						Cp-evm.model.scaffold_147.57	Pp-Potri.002G032400.1.v4.1
						Cp-evm.model.scaffold_147.57	Pp-Potri.005G230800.8.v4.1
						Cp-evm.model.scaffold_147.57	Pp-Potri.005G119601.1.v4.1
						Cp-evm.model.scaffold_147.57	Pp-Potri.007G020200.2.v4.1
						Cp-evm.model.scaffold_147.125	Pp-Potri.004G156000.2.v4.1
						Cp-evm.model.scaffold_147.125	Pp-Potri.005G121850.4.v4.1
						Cp-evm.model.scaffold_147.125	Pp-Potri.007G023600.1.v4.1
						Cp-evm.model.scaffold_147.125	Pp-Potri.009G117300.1.v4.1
						Cp-evm.model.scaffold_96.505	Pp-Potri.002G101900.1.v4.1
						Cp-evm.model.scaffold_96.505	Pp-Potri.005G071100.1.v4.1
						Cp-evm.model.scaffold_96.505	Pp-Potri.007G097600.6.v4.1
						Cp-evm.model.scaffold_8.109	Pp-Potri.001G287200.1.v4.1
						Cp-evm.model.scaffold_8.109	Pp-Potri.007G009400.4.v4.1
						Cp-evm.model.scaffold_8.109	Pp-Potri.009G081400.1.v4.1
						Cp-evm.model.scaffold_21.75	Pp-Potri.013G025900.1.v4.1
						Cp-evm.model.scaffold_74.30_evm.model.scaffold_74.31	Pp-Potri.001G416600.1.v4.1
						Cp-evm.model.scaffold_74.30_evm.model.scaffold_74.31	Pp-Potri.004G031800.1.v4.1
						Cp-evm.model.scaffold_74.30_evm.model.scaffold_74.31	Pp-Potri.011G132400.1.v4.1
						Cp-evm.model.scaffold_74.30_evm.model.scaffold_74.31	Pp-Potri.011G031000.1.v4.1
						Cp-evm.model.scaffold_138.9	Pp-Potri.008G070800.1.v4.1
						Cp-evm.model.scaffold_138.9	Pp-Potri.010G186700.1.v4.1
						Cp-evm.model.scaffold_55.254	Pp-Potri.004G128400.1.v4.1
						Cp-lmgene11587.t1	Pp-Potri.002G172101.1.v4.1
						Cp-lmgene11587.t1	Pp-Potri.014G099700.2.v4.1
						Cp-evm.model.scaffold_865.617	Pp-Potri.001G410600.2.v4.1
						Cp-evm.model.scaffold_865.617	Pp-Potri.004G029100.1.v4.1
						Cp-evm.model.scaffold_865.617	Pp-Potri.011G129500.2.v4.1
						Cp-evm.model.scaffold_865.617	Pp-Potri.011G033000.3.v4.1
						Cp-evm.model.scaffold_591.3	Pp-Potri.015G074500.1.v4.1
						Cp-evm.model.scaffold_727.50	Pp-Potri.002G105300.1.v4.1

## Sheet: Protein motifs of CpbHLHs
Table S4: Motifs in CpbHLHs protein
Motif	Sequence	Width
1	HSJAERRRREKINERLKALQSLVP	24
2	KKTDKASILDEAINYVKELQRQV	23
3	SEEPKSDYIHVRARRGQATDS	21
4	KILCERRPGQLLKLIAALEELGLEILHLNVTT	32
5	IKASLCCDDRPDLLSDLIKTLKSLRLRTVKAEIATLGGRVKNVLLIAGEE	50
6	LEVVLISGLNKNFMLCDVISVLEEEGAEVVNASFSYVABKVFHIIHSQV	49
7	TAATEQQVAKLMEEDVGAAMQDLQSKGLCLMPISLASAITN	41
8	EFLSMKLAAVNPRLBFNMEILLSKDMLZS	29
9	VLYSFSLKVEEGCKLGSADEIATAVYHIF	29
10	RKRRRTRSCKNKEEVESQRMT	21
11	AHKLVLVRSTHFRDGAKLLHHSESKIMEGLDRSPELLKERLHDLAWKLHK	50
12	AENKSAIADIEVTMIESHANL	21
13	EDLTDTEWFFLVSMSFSFKPGQGLPGRAFASGQHIWLAGAHHADSSVCER	50
14	LKEENEALQEEIKELKAEKNELRDEKIRLKADKERLEQQVK	41
15	DYEVVELLWENGQLVMHGQ	19
16	KVLSMSRLGGAGAVAPLVADI	21
17	GSQLPAIBGHGDSSPQIANFWDDELQNVVHMGFGQNAPPNFLSQNGHG	48
18	SLLAKSAGIQTVVCVPLGGGVVELGSTELISEBPDLLQKVKTLF	44
19	GYPGVAMWQWMPPAAVDTSQDHVLRPPVA	29
20	QIMWMGSGMAPMMFPGIQQYISPMGMGVGHA	31

## Sheet: Primers
Table S5: List of primers
Gene	Forward primer	Reverse primer	Function
Β-Actin	AGGCTAAGATTCAAGACAAGG	TTGGTCGCAGCTGATTGCTGTG	Real-time PCR
CpbHLH86/evm..model.scaffold_35.39	ATGGAACTGAGTGAGAAGGGG	AGAAGGATTTGCGAGGTTGC	Real-time PCR
CpbHLH82/evm..model.scaffold_64.63	CGATTTAGGGCTTTGGGG	AGTCCAACGGAGATCAGCAT	Real-time PCR
CpbHLH66/evm..model.scaffold_176.125	AGGTTATGATTGAGATGCGATG	TTCCATCAACTGAGGACGACTG	Real-time PCR
CpbHLH4/evm..model.scaffold_17.7	GACAGGAGTTGGGACTACGATG	ATTTTGCGGGGAAACACGA	Real-time PCR
CpbHLH15/evm.model.scaffold_55.138	AACGGCCACGATTTAAACGA	CGGATTTGGTCGGCAGAGAG	Real-time PCR
CpbHLH110/evm.model.scaffold_108.51	GGAATTGACATCCAACGCGA	TTGCATTTCATGGACACTCGC	Real-time PCR

## Sheet: Expression of CpbHLHs
Table S6: Expessed CpbHLHs during flower development of wintersweet genotypes
ID	15Ya-1_fpkm	15Ya-2_fpkm	15Ya-3_fpkm	15Lu-1_fpkm	15Lu-2_fpkm	15Lu-3_fpkm	HLT015-1_fpkm	HLT015-2_fpkm	HLT015-3_fpkm	40Ya-1_fpkm	40Ya-2_fpkm	40Ya-3_fpkm	40Lu-1_fpkm	40Lu-2_fpkm	40Lu-3_fpkm	HLT040-1_fpkm	HLT040-2_fpkm	HLT040-3_fpkm	15Ya-1_count	15Ya-2_count	15Ya-3_count	15Lu-1_count	15Lu-2_count	15Lu-3_count	HLT015-1_count	HLT015-2_count	HLT015-3_count	40Ya-1_count	40Ya-2_count	40Ya-3_count	40Lu-1_count	40Lu-2_count	40Lu-3_count	HLT040-1_count	HLT040-2_count	HLT040-3_count	chr	start	end	strand	gene_name	gene_description	KEGG	KEGG pathway	NR	Swissprot	Tremble	KOG	GO
evm.TU.scaffold_12.223/CpbHLH1	6.48	7.1	4.71	0	0.52	0.31	1.97	1.9	2.16	10.77	11.95	14.11	1.22	0.36	1.04	0.39	0.44	0.29	130	153	88	0	11	7	55	42	45	229	261	302	27	8	24	9	9	6	Chr1	12527843	12530002	+	EVM-prediction-scaffold_12.223	--	K22484 transcriptional regulator CBF1 | (RefSeq) transcription factor bHLH106-like (A)	--	PREDICTED: transcription factor bHLH30-like [Nelumbo nucifera]	BH030_ARATH RecName: Full=Transcription factor bHLH30; AltName: Full=Basic helix-loop-helix protein 30; Short=AtbHLH30; Short=bHLH 30; AltName: Full=Transcription factor EN 53; AltName: Full=bHLH transcription factor bHLH030;	A0A3S3NQT1_9MAGN SubName: Full=Transcription factor bHLH30-like protein {ECO:0000313|EMBL:RWR92501.1};	At1g68810	GO:0005634,nucleus; GO:0003677,DNA binding; GO:0003700,DNA-binding transcription factor activity; GO:0046983,protein dimerization activity; GO:0006355,regulation of transcription, DNA-templated; GO:0003674,molecular_function; GO:0003676,nucleic acid binding; GO:0005488,binding; GO:0097159,organic cyclic compound binding; GO:1901363,heterocyclic compound binding; GO:0140110,transcription regulator…
evm.TU.scaffold_12.249/CpbHLH2	23.21	25.65	25.45	10.56	12.91	6.9	9.71	13.5	8.92	8.28	8.35	8.31	4.3	2.59	3.5	2.7	2.66	3.3	526	625	537	265	311	175	307	337	210	199	206	201	108	66	91	70	62	76	Chr1	12943414	12945768	+	EVM-prediction-scaffold_12.249	--	K20558 transcription factor SPEECHLESS | (RefSeq) transcription factor SPEECHLESS-like (A)	ko04016: MAPK signaling pathway - plant	PREDICTED: transcription factor bHLH96 [Nelumbo nucifera]	BH094_ARATH RecName: Full=Transcription factor bHLH94; AltName: Full=Basic helix-loop-helix protein 94; Short=AtbHLH94; Short=bHLH 94; AltName: Full=Transcription factor EN 16; AltName: Full=bHLH transcription factor bHLH094;	A0A3S3N522_9MAGN SubName: Full=Transcription factor bHLH96 {ECO:0000313|EMBL:RWR92470.1};	At1g22490	GO:0005634,nucleus; GO:0003700,DNA-binding transcription factor activity; GO:0000981,DNA-binding transcription factor activity, RNA polymerase II-specific; GO:0046983,protein dimerization activity; GO:0000978,RNA polymerase II cis-regulatory region sequence-specific DNA binding; GO:0006357,regulation of transcription by RNA polymerase II; GO:0006355,regulation of transcription, DNA-templated; GO:…
evm.TU.scaffold_12.416/CpbHLH3	82.82	84.37	95.24	128.59	124.18	116.62	71.7	76.25	83.68	117.97	124.06	126.57	117.35	110.49	121.75	84.24	91.49	92.21	1598	1750	1711	2747	2548	2520	1931	1620	1677	2413	2607	2608	2508	2396	2692	1858	1816	1809	Chr1	15431980	15440583	+	EVM-prediction-scaffold_12.416	--	K18878 BHLH transcription factor Upa20 | (RefSeq) Upa20; transcription factor bHLH137-like (A)	ko04626: Plant-pathogen interaction	PREDICTED: transcription factor bHLH48 [Nelumbo nucifera]	BH060_ARATH RecName: Full=Transcription factor bHLH60; AltName: Full=Basic helix-loop-helix protein 60; Short=AtbHLH60; Short=bHLH 60; AltName: Full=Transcription factor EN 91; AltName: Full=bHLH transcription factor bHLH060;	A0A443N5L8_9MAGN SubName: Full=Transcription factor bHLH48-like protein {ECO:0000313|EMBL:RWR73793.1};	At3g57800	GO:0005634,nucleus; GO:0003677,DNA binding; GO:0003700,DNA-binding transcription factor activity; GO:0046983,protein dimerization activity; GO:0006355,regulation of transcription, DNA-templated; GO:0003674,molecular_function; GO:0003676,nucleic acid binding; GO:0005488,binding; GO:0097159,organic cyclic compound binding; GO:1901363,heterocyclic compound binding; GO:0140110,transcription regulator…
evm.TU.scaffold_17.7/CpbHLH4	23.43	30.84	23.93	36.4	35.06	29.74	39.79	34.99	32.57	27.75	29.65	28.22	30.89	26.09	28.85	51.9	51.84	53.91	489	692	465	841	778	695	1159	804	706	614	674	629	714	612	690	1238	1113	1144	Chr1	19187920	19212907	-	EVM-prediction-scaffold_17.7	--	--	--	PREDICTED: transcription factor bHLH104-like [Nelumbo nucifera]	BH034_ARATH RecName: Full=Transcription factor bHLH34; AltName: Full=Basic helix-loop-helix protein 34; Short=AtbHLH34; Short=bHLH 34; AltName: Full=Transcription factor EN 135; AltName: Full=bHLH transcription factor bHLH034;	A0A1U8AIK0_NELNU SubName: Full=transcription factor bHLH104-like {ECO:0000313|RefSeq:XP_010262298.1};	At3g23210	GO:0005634,nucleus; GO:0003700,DNA-binding transcription factor activity; GO:0046983,protein dimerization activity; GO:0043565,sequence-specific DNA binding; GO:0000976,transcription regulatory region sequence-specific DNA binding; GO:0071333,cellular response to glucose stimulus; GO:0010030,positive regulation of seed germination; GO:0006355,regulation of transcription, DNA-templated; GO:0003674…
evm.TU.scaffold_52.293/CpbHLH5	0.15	0.91	0.63	4.35	4.62	4.52	1.79	2.81	1.51	0.74	0.54	0.41	0.4	0.22	0.43	0.99	1.29	1.3	3	20	12	98	100	103	51	63	32	16	12	9	9	5	10	23	27	27	Chr1	24769416	24771962	-	EVM-prediction-scaffold_52.293	--	K18878 BHLH transcription factor Upa20 | (RefSeq) Upa20; transcription factor bHLH137-like (A)	ko04626: Plant-pathogen interaction	Myc-type [Macleaya cordata]	BH075_ARATH RecName: Full=Transcription factor bHLH75; AltName: Full=Basic helix-loop-helix protein 75; Short=AtbHLH75; Short=bHLH 75; AltName: Full=Transcription factor EN 78; AltName: Full=bHLH transcription factor bHLH075;	A0A3S3NUR4_9MAGN SubName: Full=Transcription factor bHLH75-like protein {ECO:0000313|EMBL:RWR94820.1};	At1g25330	GO:0005634,nucleus; GO:0003677,DNA binding; GO:0003700,DNA-binding transcription factor activity; GO:0046983,protein dimerization activity; GO:2000488,positive regulation of brassinosteroid biosynthetic process; GO:0006355,regulation of transcription, DNA-templated; GO:0003674,molecular_function; GO:0003676,nucleic acid binding; GO:0005488,binding; GO:0097159,organic cyclic compound binding; GO:1…
evm.TU.scaffold_21.22/CpbHLH6	3.76	2.55	6.02	14.68	14.38	10.58	5.66	4.34	5.09	5.35	4.68	3.46	11.85	11.28	11.9	4.57	2.42	4.2	59	43	88	255	240	186	124	75	83	89	80	58	206	199	214	82	39	67	Chr1	26399717	26401359	-	EVM-prediction-scaffold_21.22	--	--	--	hypothetical protein AQUCO_00900234v1 [Aquilegia coerulea]	--	A0A7J6XEG9_THATH SubName: Full=Bhlh transcription factor {ECO:0000313|EMBL:KAF5208201.1};	--	--
evm.TU.scaffold_648.4/CpbHLH12	6.84	6.36	7.16	1.48	1.51	1.37	5.22	5.31	5.23	12.61	9.54	12.07	4.48	3.38	4.36	3.05	2.99	3.56	200	200	195	48	47	45	213	171	159	391	304	377	145	111	146	102	90	106	Chr1	34977542	34980781	-	EVM-prediction-scaffold_648.4	--	K22484 transcriptional regulator CBF1 | (RefSeq) transcription factor bHLH106 (A)	--	transcription factor bHLH30 [Durio zibethinus]	BH030_ARATH RecName: Full=Transcription factor bHLH30; AltName: Full=Basic helix-loop-helix protein 30; Short=AtbHLH30; Short=bHLH 30; AltName: Full=Transcription factor EN 53; AltName: Full=bHLH transcription factor bHLH030;	A0A443N907_9MAGN SubName: Full=Transcription factor bHLH30-like protein {ECO:0000313|EMBL:RWR75001.1};	At1g68810	GO:0005634,nucleus; GO:0003677,DNA binding; GO:0003700,DNA-binding transcription factor activity; GO:0046983,protein dimerization activity; GO:0006355,regulation of transcription, DNA-templated; GO:0003674,molecular_function; GO:0003676,nucleic acid binding; GO:0005488,binding; GO:0097159,organic cyclic compound binding; GO:1901363,heterocyclic compound binding; GO:0140110,transcription regulator…
evm.TU.scaffold_47.115/CpbHLH13	8.37	11.1	10.4	2.83	2.77	3.18	4.86	4.86	4.51	7.89	8.08	9.51	2.59	4.34	4.33	3.93	2.94	4.31	216	308	250	81	76	92	175	138	121	216	227	262	74	126	128	116	78	113	Chr1	40522523	40524833	+	EVM-prediction-scaffold_47.115	--	K22484 transcriptional regulator CBF1 | (RefSeq) hypothetical protein (A)	--	Myc-type [Macleaya cordata]	BH106_ARATH RecName: Full=Transcription factor bHLH106; AltName: Full=Basic helix-loop-helix protein 106; Short=AtbHLH106; Short=bHLH 106; AltName: Full=Transcription factor EN 56; AltName: Full=bHLH transcription factor bHLH106;	A0A3S3M0C6_9MAGN SubName: Full=Transcription factor bHLH106-like protein {ECO:0000313|EMBL:RWR74789.1};	At2g41130	GO:0009941,chloroplast envelope; GO:0005634,nucleus; GO:0003677,DNA binding; GO:0003700,DNA-binding transcription factor activity; GO:0046983,protein dimerization activity; GO:0042538,hyperosmotic salinity response; GO:0006355,regulation of transcription, DNA-templated; GO:0003674,molecular_function; GO:0003676,nucleic acid binding; GO:0005488,binding; GO:0097159,organic cyclic compound binding; …
evm.TU.scaffold_55.138/CpbHLH15	43.12	46.1	45.75	0.95	0.8	1.65	0.61	0.22	0.74	43.98	43.36	46.18	3.53	5.02	3.93	0.04	0.23	0	1071	1231	1058	26	21	46	21	6	19	1158	1173	1225	97	140	112	1	6	0	Chr1	83200138	83202111	-	EVM-prediction-scaffold_55.138	--	K16190 glucuronokinase [EC:2.7.1.43] | (RefSeq) transcription factor TDR (A)	ko00040: Pentose and glucuronate interconversions; ko00053: Ascorbate and aldarate metabolism; ko00520: Amino sugar and nucleotide sugar metabolism; ko01100: Metabolic pathways	hypothetical protein AQUCO_01900147v1 [Aquilegia coerulea]	AMS_ARATH RecName: Full=Transcription factor ABORTED MICROSPORES; AltName: Full=Basic helix-loop-helix protein 21; Short=AtbHLH21; Short=bHLH 21; AltName: Full=Transcription factor EN 48; AltName: Full=bHLH transcription factor bHLH021;	A0A3S3P3A8_9MAGN SubName: Full=Transcription factor ABORTED MICROSPORES-like protein isoform X1 {ECO:0000313|EMBL:RWR92352.1};	At2g16910	GO:0005634,nucleus; GO:0003682,chromatin binding; GO:0003700,DNA-binding transcription factor activity; GO:0046983,protein dimerization activity; GO:0000978,RNA polymerase II cis-regulatory region sequence-specific DNA binding; GO:0043565,sequence-specific DNA binding; GO:0048658,anther wall tapetum development; GO:0009555,pollen development; GO:0006355,regulation of transcription, DNA-templated;…
evm.TU.scaffold_55.254/CpbHLH16	0.82	0	0	0.49	0.39	0.37	13.15	13.18	14.11	0.65	0.38	0.13	0.37	0	0.12	4.91	2	1.21	6	0	0	4	3	3	134	106	107	5	3	1	3	0	1	41	15	9	Chr1	84707666	84709209	-	EVM-prediction-scaffold_55.254	--	--	--	transcription factor ILI6 [Amborella trichopoda]	ILI6_ORYSI RecName: Full=Transcription factor ILI6; Short=OsILI6; AltName: Full=Protein INCREASED LEAF INCLINATION 6;	A0A443PQN9_9MAGN SubName: Full=Transcription factor ILI6 {ECO:0000313|EMBL:RWR93091.1};	At1g74500	GO:0005634,nucleus; GO:0046983,protein dimerization activity; GO:0009742,brassinosteroid mediated signaling pathway; GO:0080113,regulation of seed growth; GO:0006355,regulation of transcription, DNA-templated; GO:0003674,molecular_function; GO:0005488,binding; GO:0005515,protein binding; GO:0007154,cell communication; GO:0007165,signal transduction; GO:0008150,biological_process; GO:0009719,respo…
evm.TU.scaffold_742.240/CpbHLH17	5.15	4.42	4.48	1.88	1.42	1.19	14.85	18.41	13.71	1.58	2.13	3.15	1.52	0.41	0.35	42.91	44.14	46.36	89	82	72	36	26	23	358	350	246	29	40	58	29	8	7	847	784	814	Chr2	914792	916170	+	EVM-prediction-scaffold_742.240	--	--	--	PREDICTED: uncharacterized protein LOC100253569 isoform X1 [Vitis vinifera]	BH162_ARATH RecName: Full=Transcription factor bHLH162; AltName: Full=Basic helix-loop-helix protein 162; Short=AtbHLH162 {ECO:0000303|PubMed:14600211}; Short=bHLH 162; AltName: Full=bHLH transcription factor bHLH162;	A0A3S3QIJ0_9MAGN SubName: Full=Transcription factor bHLH162-like protein isoform X2 {ECO:0000313|EMBL:RWR85594.1};	At4g20970	GO:0090575,RNA polymerase II transcription regulator complex; GO:0003700,DNA-binding transcription factor activity; GO:0000981,DNA-binding transcription factor activity, RNA polymerase II-specific; GO:0046983,protein dimerization activity; GO:0000977,RNA polymerase II transcription regulatory region sequence-specific DNA binding; GO:0050832,defense response to fungus; GO:0006357,regulation of tra…
evm.TU.scaffold_742.239/CpbHLH18	1.26	0.47	1.76	0.11	0	0.22	0.54	0.23	0.49	0	0.23	0.24	0	0	0	0	0	0	10	4	13	1	0	2	6	2	4	0	2	2	0	0	0	0	0	0	Chr2	926675	927301	-	EVM-prediction-scaffold_742.239	--	--	--	transcription factor bHLH162-like [Hevea brasiliensis]	BH162_ARATH RecName: Full=Transcription factor bHLH162; AltName: Full=Basic helix-loop-helix protein 162; Short=AtbHLH162 {ECO:0000303|PubMed:14600211}; Short=bHLH 162; AltName: Full=bHLH transcription factor bHLH162;	A0A3S3QIJ0_9MAGN SubName: Full=Transcription factor bHLH162-like protein isoform X2 {ECO:0000313|EMBL:RWR85594.1};	At4g20970	GO:0090575,RNA polymerase II transcription regulator complex; GO:0003700,DNA-binding transcription factor activity; GO:0000981,DNA-binding transcription factor activity, RNA polymerase II-specific; GO:0046983,protein dimerization activity; GO:0000977,RNA polymerase II transcription regulatory region sequence-specific DNA binding; GO:0050832,defense response to fungus; GO:0006357,regulation of tra…
evm.TU.scaffold_742.237/CpbHLH19	2.26	1.05	0.73	0.92	0.53	1.11	0.81	1.44	1.31	0.11	0.42	0.32	0	0.1	0	3.26	2.86	4.11	20	10	6	9	5	11	10	14	12	1	4	3	0	1	0	33	26	37	Chr2	960931	961822	-	EVM-prediction-scaffold_742.237	--	--	--	transcription factor bHLH162-like [Hevea brasiliensis]	BH162_ARATH RecName: Full=Transcription factor bHLH162; AltName: Full=Basic helix-loop-helix protein 162; Short=AtbHLH162 {ECO:0000303|PubMed:14600211}; Short=bHLH 162; AltName: Full=bHLH transcription factor bHLH162;	A0A3S3QIJ0_9MAGN SubName: Full=Transcription factor bHLH162-like protein isoform X2 {ECO:0000313|EMBL:RWR85594.1};	At4g20970	GO:0090575,RNA polymerase II transcription regulator complex; GO:0003700,DNA-binding transcription factor activity; GO:0000981,DNA-binding transcription factor activity, RNA polymerase II-specific; GO:0046983,protein dimerization activity; GO:0000977,RNA polymerase II transcription regulatory region sequence-specific DNA binding; GO:0050832,defense response to fungus; GO:0006357,regulation of tra…
evm.TU.scaffold_742.133/CpbHLH21	3.7	2.77	4.2	15.73	19.53	14.63	11.12	14.85	12.41	2.88	2.42	2.98	17.36	14.33	14.9	5.19	4.66	5.43	108	87	114	508	606	478	453	477	376	89	77	93	561	470	498	173	140	161	Chr2	2631973	2636088	-	EVM-prediction-scaffold_742.133	--	K18878 BHLH transcription factor Upa20 | (RefSeq) Upa20; transcription factor bHLH137-like (A)	ko04626: Plant-pathogen interaction	Myc-type [Macleaya cordata]	BH063_ARATH RecName: Full=Transcription factor bHLH63; AltName: Full=Basic helix-loop-helix protein 63; Short=AtbHLH63; Short=bHLH 63; AltName: Full=Protein CRYPTOCHROME INTERACTING BASIC-HELIX-LOOP-HELIX 1; AltName: Full=Transcription factor EN 84; AltName: Full=bHLH transcription factor bHLH063;	A0A443NV37_9MAGN SubName: Full=Transcription factor bHLH63-like protein {ECO:0000313|EMBL:RWR82407.1};	At1g68920	GO:0005634,nucleus; GO:0003677,DNA binding; GO:0003700,DNA-binding transcription factor activity; GO:0046983,protein dimerization activity; GO:0009908,flower development; GO:0045824,negative regulation of innate immune response; GO:0009911,positive regulation of flower development; GO:0009637,response to blue light; GO:0006351,transcription, DNA-templated; GO:0003674,molecular_function; GO:000367…
evm.TU.scaffold_131.115/CpbHLH22	3.97	5.46	4.73	0	0	0.13	0	0	0	1.11	1.28	1.24	0.2	0.2	0.38	0.13	0	0	54	80	60	0	0	2	0	0	0	16	19	18	3	3	6	2	0	0	Chr2	44267337	44269009	-	EVM-prediction-scaffold_131.115	--	--	--	PREDICTED: transcription factor bHLH95 [Nelumbo nucifera]	BH095_ARATH RecName: Full=Transcription factor bHLH95 {ECO:0000303|PubMed:14600211}; AltName: Full=Basic helix-loop-helix protein 95 {ECO:0000303|PubMed:14600211}; Short=AtbHLH95 {ECO:0000303|PubMed:14600211}; Short=bHLH 95 {ECO:0000303|PubMed:14600211}; AltName: Full=Protein RETARDED GROWTH OF EMBRYO 1 {ECO:0000303|PubMed:18567831}; AltName: Full=Protein ZHOUPI {ECO:0000303|PubMed:18849529}; Alt…	A0A1U8AMP7_NELNU SubName: Full=transcription factor bHLH95 {ECO:0000313|RefSeq:XP_010263710.1};	At1g49770	GO:0005634,nucleus; GO:0003677,DNA binding; GO:0003700,DNA-binding transcription factor activity; GO:0046983,protein dimerization activity; GO:0009793,embryo development ending in seed dormancy; GO:0009960,endosperm development; GO:0010115,regulation of abscisic acid biosynthetic process; GO:0006355,regulation of transcription, DNA-templated; GO:0010162,seed dormancy process; GO:0048317,seed morp…
evm.TU.scaffold_122.148/CpbHLH23	8.66	6.92	8.97	1.73	2.18	1.25	6.62	5.76	6.78	9.29	10.05	9.3	2.56	3.12	4.1	11.97	13.72	10.55	284	244	274	63	76	46	303	208	231	323	359	326	93	115	154	449	463	352	Chr2	47615159	47621850	-	EVM-prediction-scaffold_122.148	--	K05765 cofilin | (RefSeq) uncharacterized LOC105781290 (A)	--	Myc-type [Macleaya cordata]	BH153_ARATH RecName: Full=Transcription factor bHLH153; AltName: Full=BHLH transcription factor alpha; Short=bHLH alpha {ECO:0000312|EMBL:CAE09167.1}; AltName: Full=Basic helix-loop-helix protein 153; Short=AtbHLH153 {ECO:0000303|PubMed:14600211}; Short=bHLH 153; AltName: Full=bHLH transcription factor bHLH153;	A0A3S3NPC8_9MAGN SubName: Full=Transcription factor bHLH113 {ECO:0000313|EMBL:RWR83856.1};	At1g27660	GO:0005634,nucleus; GO:0003700,DNA-binding transcription factor activity; GO:0000981,DNA-binding transcription factor activity, RNA polymerase II-specific; GO:0046983,protein dimerization activity; GO:0000978,RNA polymerase II cis-regulatory region sequence-specific DNA binding; GO:0006357,regulation of transcription by RNA polymerase II; GO:0003674,molecular_function; GO:0140110,transcription re…
evm.TU.scaffold_122.656/CpbHLH24	0.35	1.56	1.58	0.05	0.57	0.27	0.18	0.28	0	3.44	5.63	4.89	1.83	1.13	2.92	0.09	0.34	0.3	7	33	29	1	12	6	5	6	0	72	121	103	40	25	66	2	7	6	Chr2	55234744	55239135	+	EVM-prediction-scaffold_122.656	--	--	--	PREDICTED: transcription factor bHLH36-like [Nelumbo nucifera]	BH162_ARATH RecName: Full=Transcription factor bHLH162; AltName: Full=Basic helix-loop-helix protein 162; Short=AtbHLH162 {ECO:0000303|PubMed:14600211}; Short=bHLH 162; AltName: Full=bHLH transcription factor bHLH162;	A0A3S3R9N1_9MAGN SubName: Full=Transcription factor bHLH36-like protein {ECO:0000313|EMBL:RWR97419.1};	At4g20970	GO:0090575,RNA polymerase II transcription regulator complex; GO:0003700,DNA-binding transcription factor activity; GO:0000981,DNA-binding transcription factor activity, RNA polymerase II-specific; GO:0046983,protein dimerization activity; GO:0000977,RNA polymerase II transcription regulatory region sequence-specific DNA binding; GO:0050832,defense response to fungus; GO:0006357,regulation of tra…
evm.TU.scaffold_865.209/CpbHLH26	0.28	0.4	0	0	0	0	0	0	0	1.64	1.3	1.25	0.75	0.14	0.41	0	0.11	0.04	7	11	0	0	0	0	0	0	0	44	36	34	21	4	12	0	3	1	Chr2	65738470	65751410	+	EVM-prediction-scaffold_865.209	--	K23408 cell division cycle-associated protein 7 | (RefSeq) uncharacterized LOC104595844 (A)	--	PREDICTED: transcription factor HEC1 [Vitis vinifera]	HEC2_ARATH RecName: Full=Transcription factor HEC2; AltName: Full=Basic helix-loop-helix protein 37; Short=AtbHLH37; Short=bHLH 37; AltName: Full=Protein HECATE 2; AltName: Full=Transcription factor EN 117; AltName: Full=bHLH transcription factor bHLH037;	A0A6M8YF96_ARIMN SubName: Full=HECATE1 {ECO:0000313|EMBL:QKK36210.1}; Flags: Fragment;	At3g50330	GO:0005634,nucleus; GO:0003677,DNA binding; GO:0003700,DNA-binding transcription factor activity; GO:0046983,protein dimerization activity; GO:0048462,carpel formation; GO:0048467,gynoecium development; GO:0080126,ovary septum development; GO:0006355,regulation of transcription, DNA-templated; GO:0010500,transmitting tissue development; GO:0003674,molecular_function; GO:0003676,nucleic acid bindi…
evm.TU.scaffold_74.30/CpbHLH30	63.06	65.56	59.05	35.62	43.47	36.21	60.36	40.02	57.6	51.39	52.88	53.31	27.66	30.88	30.03	57.71	56.02	62.02	1521	1700	1326	951	1115	978	2032	1063	1443	1314	1389	1373	739	837	830	1591	1390	1521	Chr2	72795727	72803150	+	MERGED:-EVM-prediction-scaffold_74.30%3B-EVM-prediction-scaffold_74.31	--	--	--	PREDICTED: transcription factor ILR3-like [Nelumbo nucifera]	ILR3_ARATH RecName: Full=Transcription factor ILR3; AltName: Full=Basic helix-loop-helix protein 105; Short=AtbHLH105; Short=bHLH 105; AltName: Full=Protein IAA-LEUCINE RESISTANT 3; AltName: Full=Transcription factor EN 133; AltName: Full=bHLH transcription factor bHLH105;	A0A1U7Z7T7_NELNU SubName: Full=transcription factor ILR3-like {ECO:0000313|RefSeq:XP_010247015.1};	At5g54680	GO:0005634,nucleus; GO:0003700,DNA-binding transcription factor activity; GO:0046983,protein dimerization activity; GO:0000976,transcription regulatory region sequence-specific DNA binding; GO:0019760,glucosinolate metabolic process; GO:0006355,regulation of transcription, DNA-templated; GO:0003674,molecular_function; GO:0140110,transcription regulator activity; GO:0005488,binding; GO:0005515,pro…
evm.TU.scaffold_752.25/CpbHLH31	7.83	8.84	9.52	18.79	18.96	18	11.04	8.16	11.5	14.9	10.61	10.7	7.77	9.48	8.18	7.64	6.86	6.06	61	74	69	162	157	157	120	70	93	123	90	89	67	83	73	68	55	48	Chr2	74977344	74981814	-	EVM-prediction-scaffold_752.25	--	K12126 phytochrome-interacting factor 3 | (RefSeq) uncharacterized protein LOC107912232 (A)	ko04075: Plant hormone signal transduction; ko04712: Circadian rhythm - plant	PREDICTED: transcription factor bHLH66 [Nelumbo nucifera]	LRL1_ARATH RecName: Full=Transcription factor LRL1 {ECO:0000305}; AltName: Full=Basic helix-loop-helix protein 66 {ECO:0000303|PubMed:12679534}; Short=AtbHLH66 {ECO:0000303|PubMed:12679534}; Short=bHLH 66 {ECO:0000303|PubMed:12679534}; AltName: Full=Protein DEFECTIVE REGION OF POLLEN 1 {ECO:0000303|PubMed:28585562}; AltName: Full=Protein LJRHL1- LIKE 1 {ECO:0000303|PubMed:19675148}; Short=AtLRL1 …	A0A7J6FL59_CANSA RecName: Full=BHLH domain-containing protein {ECO:0000259|PROSITE:PS50888};	At2g24260	GO:0005634,nucleus; GO:0003700,DNA-binding transcription factor activity; GO:0000981,DNA-binding transcription factor activity, RNA polymerase II-specific; GO:0046983,protein dimerization activity; GO:0000978,RNA polymerase II cis-regulatory region sequence-specific DNA binding; GO:0000976,transcription regulatory region sequence-specific DNA binding; GO:0055046,microgametogenesis; GO:0048235,pol…
evm.TU.scaffold_801.44/CpbHLH32	36.58	23.77	22.47	6.87	3.43	5.23	27.14	28.11	25.34	29.41	27.65	33.83	27.4	24.77	31.86	21.56	12.05	13.61	481	336	275	100	48	77	498	407	346	410	396	475	399	366	480	324	163	182	Chr2	77478984	77483186	+	EVM-prediction-scaffold_801.44	--	K13422 transcription factor MYC2 | (RefSeq) transcription factor MYC2-like (A)	ko04016: MAPK signaling pathway - plant; ko04075: Plant hormone signal transduction	transcription factor bHLH35 [Prunus persica]	BH035_ARATH RecName: Full=Transcription factor bHLH35; AltName: Full=Basic helix-loop-helix protein 35; Short=AtbHLH35; Short=bHLH 35; AltName: Full=Transcription factor EN 41; AltName: Full=bHLH transcription factor bHLH035;	A0A443PL36_9MAGN SubName: Full=Transcription factor bHLH35 isoform X1 {ECO:0000313|EMBL:RWR91494.1};	At5g57150	GO:0005634,nucleus; GO:0003700,DNA-binding transcription factor activity; GO:0046983,protein dimerization activity; GO:0043565,sequence-specific DNA binding; GO:0006355,regulation of transcription, DNA-templated; GO:0003674,molecular_function; GO:0140110,transcription regulator activity; GO:0005488,binding; GO:0005515,protein binding; GO:0003676,nucleic acid binding; GO:0003677,DNA binding; GO:00…
evm.TU.scaffold_70.545/CpbHLH33	15.41	14.95	17.42	7.73	9.45	7.6	8.53	8.17	7.6	18.5	13.97	16.44	12.91	10.13	12.52	5.11	6.37	5.6	322	336	339	179	210	178	249	188	165	410	318	367	299	238	300	122	137	119	Chr3	335054	364034	-	EVM-prediction-scaffold_70.545	--	K18878 BHLH transcription factor Upa20 | (RefSeq) Upa20; transcription factor bHLH137-like (A)	ko04626: Plant-pathogen interaction	PREDICTED: transcription factor bHLH79-like isoform X1 [Nelumbo nucifera]	BH094_ORYSJ RecName: Full=Transcription factor BHLH094 {ECO:0000305}; AltName: Full=Basic helix-loop-helix protein 94 {ECO:0000303|PubMed:16896230}; Short=OsbHLH094 {ECO:0000303|PubMed:16896230}; AltName: Full=bHLH transcription factor bHLH094 {ECO:0000305};	A0A1U8AVZ1_NELNU SubName: Full=transcription factor bHLH79-like isoform X1 {ECO:0000313|RefSeq:XP_010272168.1};	At1g59640	GO:0005634,nucleus; GO:0003677,DNA binding; GO:0003700,DNA-binding transcription factor activity; GO:0046983,protein dimerization activity; GO:0006355,regulation of transcription, DNA-templated; GO:0003674,molecular_function; GO:0003676,nucleic acid binding; GO:0005488,binding; GO:0097159,organic cyclic compound binding; GO:1901363,heterocyclic compound binding; GO:0140110,transcription regulator…
evm.TU.scaffold_70.367/CpbHLH36	16.7	15.94	15.2	13.51	12.14	11.89	23.65	35.09	22.8	15.76	16.26	16.3	9.02	8.69	7.9	15.96	12.36	16.39	498	511	422	446	385	397	984	1152	706	498	528	519	298	291	270	544	379	497	Chr3	2678585	2680884	+	EVM-prediction-scaffold_70.367	--	K16190 glucuronokinase [EC:2.7.1.43] | (RefSeq) transcription factor TDR (A)	ko00040: Pentose and glucuronate interconversions; ko00053: Ascorbate and aldarate metabolism; ko00520: Amino sugar and nucleotide sugar metabolism; ko01100: Metabolic pathways	PREDICTED: transcription factor bHLH93 [Vitis vinifera]	BH093_ARATH RecName: Full=Transcription factor bHLH93; AltName: Full=Basic helix-loop-helix protein 93; Short=AtbHLH93; Short=bHLH 93; AltName: Full=Transcription factor EN 47; AltName: Full=bHLH transcription factor bHLH093;	A0A3S3NE67_9MAGN SubName: Full=Transcription factor bHLH93 {ECO:0000313|EMBL:RWR77887.1};	At5g65640	GO:0005634,nucleus; GO:0003700,DNA-binding transcription factor activity; GO:0046983,protein dimerization activity; GO:0043565,sequence-specific DNA binding; GO:0045487,gibberellin catabolic process; GO:0007275,multicellular organism development; GO:0010371,regulation of gibberellin biosynthetic process; GO:0006355,regulation of transcription, DNA-templated; GO:0003674,molecular_function; GO:0140…
evm.TU.scaffold_70.362/CpbHLH37	1.68	1.43	1.05	0.89	1.19	0.25	4.82	3.63	3.51	1.26	0.32	0.2	0.06	0.19	0.06	5.82	5.11	4.62	24	22	14	14	18	4	96	57	52	19	5	3	1	3	1	95	75	67	Chr3	2730266	2732903	+	EVM-prediction-scaffold_70.362	--	K16190 glucuronokinase [EC:2.7.1.43] | (RefSeq) transcription factor TDR (A)	ko00040: Pentose and glucuronate interconversions; ko00053: Ascorbate and aldarate metabolism; ko00520: Amino sugar and nucleotide sugar metabolism; ko01100: Metabolic pathways	PREDICTED: transcription factor FER-LIKE IRON DEFICIENCY-INDUCED TRANSCRIPTION FACTOR-like [Nelumbo nucifera]	BH027_ARATH RecName: Full=Transcription factor bHLH27; AltName: Full=Basic helix-loop-helix protein 27; Short=AtbHLH27; Short=bHLH 27; AltName: Full=Transcription factor EN 42; AltName: Full=bHLH transcription factor bHLH027;	A0A3S3MK52_9MAGN SubName: Full=Transcription factor FER-LIKE IRON DEFICIENCY-INDUCED TRANSCRIPTION FACTOR-like protein {ECO:0000313|EMBL:RWR77896.1};	At5g57150	GO:0005634,nucleus; GO:0003700,DNA-binding transcription factor activity; GO:0046983,protein dimerization activity; GO:0043565,sequence-specific DNA binding; GO:0006355,regulation of transcription, DNA-templated; GO:0003674,molecular_function; GO:0140110,transcription regulator activity; GO:0005488,binding; GO:0005515,protein binding; GO:0003676,nucleic acid binding; GO:0003677,DNA binding; GO:00…
evm.TU.scaffold_70.361/CpbHLH38	24.8	26.91	24.74	8.79	9.11	7.37	34.24	34.8	26.47	14.1	14.92	11.91	23.07	18.1	21.35	15.07	12.93	13.83	589	687	547	231	230	196	1135	910	653	355	386	302	607	483	581	409	316	334	Chr3	2739180	2746863	+	EVM-prediction-scaffold_70.361	--	K16190 glucuronokinase [EC:2.7.1.43] | (RefSeq) transcription factor TDR (A)	ko00040: Pentose and glucuronate interconversions; ko00053: Ascorbate and aldarate metabolism; ko00520: Amino sugar and nucleotide sugar metabolism; ko01100: Metabolic pathways	PREDICTED: transcription factor FER-LIKE IRON DEFICIENCY-INDUCED TRANSCRIPTION FACTOR-like [Nelumbo nucifera]	FIT_ARATH RecName: Full=Transcription factor FER-LIKE IRON DEFICIENCY-INDUCED TRANSCRIPTION FACTOR; AltName: Full=Basic helix-loop-helix protein 29; Short=AtbHLH29; Short=bHLH 29; AltName: Full=FER-LIKE REGULATOR OF IRON UPTAKE; AltName: Full=Transcription factor EN 43; AltName: Full=Transcription factor Fe-DEFICIENCY INDUCED TRANSCRIPTION FACTOR 1; AltName: Full=bHLH transcription factor bHLH029;	A0A3S3MK52_9MAGN SubName: Full=Transcription factor FER-LIKE IRON DEFICIENCY-INDUCED TRANSCRIPTION FACTOR-like protein {ECO:0000313|EMBL:RWR77896.1};	At2g28160	GO:0005634,nucleus; GO:0003700,DNA-binding transcription factor activity; GO:0046983,protein dimerization activity; GO:0043565,sequence-specific DNA binding; GO:0034756,regulation of iron ion transport; GO:0006355,regulation of transcription, DNA-templated; GO:0010039,response to iron ion; GO:0003674,molecular_function; GO:0140110,transcription regulator activity; GO:0005488,binding; GO:0005515,p…
evm.TU.scaffold_70.335/CpbHLH40	6.17	5.67	5.37	2	1.43	1.38	1.73	2.42	1.98	3.83	3.87	3.9	0.83	1.13	0.98	0.51	0.62	0.3	243	240	197	87	60	61	95	105	81	160	166	164	36	50	44	23	25	12	Chr3	3110338	3116521	-	EVM-prediction-scaffold_70.335	--	K18878 BHLH transcription factor Upa20 | (RefSeq) Upa20; transcription factor bHLH137-like (A)	ko04626: Plant-pathogen interaction	PREDICTED: transcription factor bHLH74-like isoform X5 [Nelumbo nucifera]	BH074_ARATH RecName: Full=Transcription factor bHLH74; AltName: Full=Basic helix-loop-helix protein 74; Short=AtbHLH74; Short=bHLH 74; AltName: Full=Protein ACTIVATOR FOR CELL ELONGATION 2; AltName: Full=Transcription factor EN 90; AltName: Full=bHLH transcription factor bHLH074;	A0A443NHE6_9MAGN SubName: Full=Transcription factor bHLH74-like protein isoform X2 {ECO:0000313|EMBL:RWR77933.1};	At1g10120	GO:0005634,nucleus; GO:0003700,DNA-binding transcription factor activity; GO:0046983,protein dimerization activity; GO:0000976,transcription regulatory region sequence-specific DNA binding; GO:0040008,regulation of growth; GO:0006355,regulation of transcription, DNA-templated; GO:0009637,response to blue light; GO:0003674,molecular_function; GO:0140110,transcription regulator activity; GO:0005488…
evm.TU.scaffold_855.53/CpbHLH41	0.24	0	0	0.08	0.03	0	0.13	0.27	0.26	0	0.25	0	0	0	0.16	0.42	1.1	1.44	8	0	0	3	1	0	6	10	9	0	9	0	0	0	6	16	38	49	Chr3	10603620	10607435	+	EVM-prediction-scaffold_855.53	--	K13422 transcription factor MYC2 | (RefSeq) transcription factor MYC2-like (A)	ko04016: MAPK signaling pathway - plant; ko04075: Plant hormone signal transduction	PREDICTED: putative transcription factor bHLH041 [Elaeis guineensis]	BH041_ARATH RecName: Full=Putative transcription factor bHLH041; AltName: Full=Basic helix-loop-helix protein 41; Short=AtbHLH41; Short=bHLH 41; AltName: Full=Transcription factor EN 51; AltName: Full=bHLH transcription factor bHLH041;	A0A3S3Q3M0_9MAGN SubName: Full=Putative transcription factor bHLH041 {ECO:0000313|EMBL:RWR78065.1};	At5g56960	GO:0005634,nucleus; GO:0003677,DNA binding; GO:0003700,DNA-binding transcription factor activity; GO:0046983,protein dimerization activity; GO:0006355,regulation of transcription, DNA-templated; GO:0010200,response to chitin; GO:0003674,molecular_function; GO:0003676,nucleic acid binding; GO:0005488,binding; GO:0097159,organic cyclic compound binding; GO:1901363,heterocyclic compound binding; GO:…
evm.TU.scaffold_855.88/CpbHLH42	9.05	10.39	8.86	3.15	2.71	2.57	2.78	3.93	4.24	9.75	9.04	8.44	13.85	11.33	11.36	1.51	0.9	1.1	226	279	206	87	72	72	97	108	110	258	246	225	383	318	325	43	23	28	Chr3	11139487	11141291	+	EVM-prediction-scaffold_855.88	--	K12126 phytochrome-interacting factor 3 | (RefSeq) transcription factor PIF3-like isoform X1 (A)	ko04075: Plant hormone signal transduction; ko04712: Circadian rhythm - plant	PREDICTED: transcription factor bHLH87-like [Nelumbo nucifera]	BH087_ARATH RecName: Full=Transcription factor bHLH87; AltName: Full=Basic helix-loop-helix protein 87; Short=AtbHLH87; Short=bHLH 87; AltName: Full=Transcription factor EN 121; AltName: Full=bHLH transcription factor bHLH087;	A0A443NHW5_9MAGN SubName: Full=Transcription factor bHLH87-like protein {ECO:0000313|EMBL:RWR78108.1};	At3g21330	GO:0005634,nucleus; GO:0003700,DNA-binding transcription factor activity; GO:0046983,protein dimerization activity; GO:0000976,transcription regulatory region sequence-specific DNA binding; GO:0006355,regulation of transcription, DNA-templated; GO:0003674,molecular_function; GO:0140110,transcription regulator activity; GO:0005488,binding; GO:0005515,protein binding; GO:0001067,regulatory region n…
evm.TU.scaffold_145.109/CpbHLH43	29.88	28.89	31.78	18.79	19.96	16.91	10.14	14.83	12.21	27.79	26.52	26.96	18.21	18.1	16.93	8.76	11.43	10.28	1357	1411	1344	945	964	860	643	742	576	1338	1312	1308	916	924	881	455	534	475	Chr3	48130210	48133833	+	EVM-prediction-scaffold_145.109	--	K18878 BHLH transcription factor Upa20 | (RefSeq) Upa20; transcription factor bHLH137-like (A)	ko04626: Plant-pathogen interaction	Myc-type [Macleaya cordata]	BH062_ARATH RecName: Full=Transcription factor bHLH62; AltName: Full=Basic helix-loop-helix protein 62; Short=AtbHLH62; Short=bHLH 62; AltName: Full=Transcription factor EN 85; AltName: Full=bHLH transcription factor bHLH062;	A0A443N7Z7_9MAGN SubName: Full=Transcription factor bHLH62-like protein {ECO:0000313|EMBL:RWR74639.1};	At3g07340	GO:0005634,nucleus; GO:0003700,DNA-binding transcription factor activity; GO:0046983,protein dimerization activity; GO:0000976,transcription regulatory region sequence-specific DNA binding; GO:0006355,regulation of transcription, DNA-templated; GO:0003674,molecular_function; GO:0140110,transcription regulator activity; GO:0005488,binding; GO:0005515,protein binding; GO:0001067,regulatory region n…
evm.TU.scaffold_130.76/CpbHLH44	39.21	36.62	40.58	19.25	17.32	16.25	17.72	14.2	15.7	37.13	36.17	34.43	22.8	20.14	19.24	9.24	7.57	8.11	1284	1289	1237	698	603	596	810	512	534	1289	1290	1204	827	741	722	346	255	270	Chr3	54089115	54095673	+	EVM-prediction-scaffold_130.76	--	K16190 glucuronokinase [EC:2.7.1.43] | (RefSeq) transcription factor TDR (A)	ko00040: Pentose and glucuronate interconversions; ko00053: Ascorbate and aldarate metabolism; ko00520: Amino sugar and nucleotide sugar metabolism; ko01100: Metabolic pathways	PREDICTED: transcription factor ICE1 [Nelumbo nucifera]	ICE1_ARATH RecName: Full=Transcription factor ICE1; AltName: Full=Basic helix-loop-helix protein 116; Short=AtbHLH116; Short=bHLH 116; AltName: Full=Inducer of CBF expression 1; AltName: Full=Transcription factor EN 45; AltName: Full=Transcription factor SCREAM; AltName: Full=bHLH transcription factor bHLH116;	A0A1U7ZGF4_NELNU SubName: Full=transcription factor ICE1 {ECO:0000313|RefSeq:XP_010250549.1};	At3g26744	GO:0005634,nucleus; GO:0000987,cis-regulatory region sequence-specific DNA binding; GO:0001046,core promoter sequence-specific DNA binding; GO:0003677,DNA binding; GO:0003700,DNA-binding transcription factor activity; GO:0046983,protein dimerization activity; GO:0043565,sequence-specific DNA binding; GO:0000976,transcription regulatory region sequence-specific DNA binding; GO:0009738,abscisic aci…
evm.TU.scaffold_178.166/CpbHLH49	10.2	11.04	6.85	0.33	0.34	0.69	5.21	6.35	5.71	8.97	10.75	11.61	1.8	0.98	1.88	1.88	1.9	1.04	251	292	157	9	9	19	179	172	146	234	288	305	49	27	53	53	48	26	Chr3	68790273	68794057	+	EVM-prediction-scaffold_178.166	--	K18878 BHLH transcription factor Upa20 | (RefSeq) Upa20; transcription factor bHLH137-like (A)	ko04626: Plant-pathogen interaction	PREDICTED: transcription factor bHLH137 [Vitis vinifera]	BH137_ARATH RecName: Full=Transcription factor bHLH137; AltName: Full=Basic helix-loop-helix protein 137; Short=AtbHLH137; Short=bHLH 137; AltName: Full=Transcription factor EN 89; AltName: Full=bHLH transcription factor bHLH137;	A0A5B6ZXD7_DAVIN RecName: Full=BHLH domain-containing protein {ECO:0000259|PROSITE:PS50888}; Flags: Fragment;	At3g07340	GO:0005634,nucleus; GO:0003677,DNA binding; GO:0003700,DNA-binding transcription factor activity; GO:0046983,protein dimerization activity; GO:0009739,response to gibberellin; GO:0003674,molecular_function; GO:0003676,nucleic acid binding; GO:0005488,binding; GO:0097159,organic cyclic compound binding; GO:1901363,heterocyclic compound binding; GO:0140110,transcription regulator activity; GO:00055…
evm.TU.scaffold_89.14/CpbHLH50	16.7	20.7	20.62	11.28	9.6	10.7	11.49	10.46	12.77	23.43	23.15	21.8	20.68	20.47	19.8	7.4	6.34	7.46	535	713	615	400	327	384	514	369	425	796	808	746	734	737	727	271	209	243	Chr3	68955711	68960424	-	EVM-prediction-scaffold_89.14	--	K16190 glucuronokinase [EC:2.7.1.43] | (RefSeq) transcription factor TDR (A)	ko00040: Pentose and glucuronate interconversions; ko00053: Ascorbate and aldarate metabolism; ko00520: Amino sugar and nucleotide sugar metabolism; ko01100: Metabolic pathways	PREDICTED: transcription factor ICE1 [Nelumbo nucifera]	ICE1_ARATH RecName: Full=Transcription factor ICE1; AltName: Full=Basic helix-loop-helix protein 116; Short=AtbHLH116; Short=bHLH 116; AltName: Full=Inducer of CBF expression 1; AltName: Full=Transcription factor EN 45; AltName: Full=Transcription factor SCREAM; AltName: Full=bHLH transcription factor bHLH116;	A0A3S3PB04_9MAGN SubName: Full=Transcription factor ICE1 {ECO:0000313|EMBL:RWR86933.1};	At3g26744	GO:0005634,nucleus; GO:0000987,cis-regulatory region sequence-specific DNA binding; GO:0001046,core promoter sequence-specific DNA binding; GO:0003677,DNA binding; GO:0003700,DNA-binding transcription factor activity; GO:0046983,protein dimerization activity; GO:0043565,sequence-specific DNA binding; GO:0000976,transcription regulatory region sequence-specific DNA binding; GO:0009738,abscisic aci…
evm.TU.scaffold_92.439/CpbHLH51	2.62	2.54	3.02	1.66	2.11	2.2	1.02	1.29	1.57	1.74	2.39	1.4	2.07	2.35	1.74	0.83	1.27	1.66	138	144	148	97	118	130	75	75	86	97	137	79	121	139	105	50	69	89	Chr4	2291429	2295982	-	EVM-prediction-scaffold_92.439	--	K04506 E3 ubiquitin-protein ligase SIAH1 [EC:2.3.2.27] | (RefSeq) E3 ubiquitin-protein ligase SINAT5-like (A)	ko04120: Ubiquitin mediated proteolysis	PREDICTED: transcription factor FER-LIKE IRON DEFICIENCY-INDUCED TRANSCRIPTION FACTOR-like [Nelumbo nucifera]	FIT_ARATH RecName: Full=Transcription factor FER-LIKE IRON DEFICIENCY-INDUCED TRANSCRIPTION FACTOR; AltName: Full=Basic helix-loop-helix protein 29; Short=AtbHLH29; Short=bHLH 29; AltName: Full=FER-LIKE REGULATOR OF IRON UPTAKE; AltName: Full=Transcription factor EN 43; AltName: Full=Transcription factor Fe-DEFICIENCY INDUCED TRANSCRIPTION FACTOR 1; AltName: Full=bHLH transcription factor bHLH029;	A0A3S3NNN1_9MAGN SubName: Full=Transcription factor FER-LIKE IRON DEFICIENCY-INDUCED TRANSCRIPTION FACTOR-like protein {ECO:0000313|EMBL:RWR83410.1};	At2g28160	GO:0005634,nucleus; GO:0003700,DNA-binding transcription factor activity; GO:0046983,protein dimerization activity; GO:0043565,sequence-specific DNA binding; GO:0034756,regulation of iron ion transport; GO:0006355,regulation of transcription, DNA-templated; GO:0010039,response to iron ion; GO:0003674,molecular_function; GO:0140110,transcription regulator activity; GO:0005488,binding; GO:0005515,p…
evm.TU.scaffold_92.303/CpbHLH52	41.56	37.43	39.77	16.1	19.96	15.65	48.01	52.04	50.34	49.86	48.85	47.55	42.29	43.89	41.04	45.55	57.25	50.2	1541	1492	1373	661	787	650	2485	2125	1939	1960	1973	1883	1737	1829	1744	1931	2184	1893	Chr4	4101723	4113081	-	EVM-prediction-scaffold_92.303	--	K18878 BHLH transcription factor Upa20 | (RefSeq) Upa20; transcription factor bHLH137-like (A)	ko04626: Plant-pathogen interaction	PREDICTED: transcription factor bHLH68-like isoform X2 [Nelumbo nucifera]	LRL3_ARATH RecName: Full=Transcription factor LRL3 {ECO:0000305}; AltName: Full=Basic helix-loop-helix protein 82 {ECO:0000303|PubMed:12679534}; Short=AtbHLH82 {ECO:0000303|PubMed:12679534}; Short=bHLH 82 {ECO:0000303|PubMed:12679534}; AltName: Full=Protein DEFECTIVE REGION OF POLLEN 3 {ECO:0000303|PubMed:28585562}; AltName: Full=Protein LJRHL1- LIKE 3 {ECO:0000303|PubMed:19675148}; Short=AtLRL3 …	A0A443PYM0_9MAGN SubName: Full=Transcription factor bHLH68-like protein isoform X2 {ECO:0000313|EMBL:RWR95849.1};	At5g58010	GO:0005634,nucleus; GO:0003700,DNA-binding transcription factor activity; GO:0000981,DNA-binding transcription factor activity, RNA polymerase II-specific; GO:0046983,protein dimerization activity; GO:0000978,RNA polymerase II cis-regulatory region sequence-specific DNA binding; GO:0000976,transcription regulatory region sequence-specific DNA binding; GO:0006357,regulation of transcription by RNA…
evm.TU.scaffold_92.17/CpbHLH53	50.84	46.42	51.53	39.86	33.54	35.65	48.13	33.65	49.85	59.57	55.07	62.7	43.32	41.18	43.43	35.75	37.77	38.43	1136	1115	1072	986	797	892	1501	828	1157	1411	1340	1496	1072	1034	1112	913	868	873	Chr4	7967721	7972245	+	EVM-prediction-scaffold_92.17	--	K12126 phytochrome-interacting factor 3 | (RefSeq) transcription factor PIF3 isoform X1 (A)	ko04075: Plant hormone signal transduction; ko04712: Circadian rhythm - plant	PREDICTED: transcription factor bHLH66 [Nelumbo nucifera]	RHL1_LOTJA RecName: Full=bHLH transcription factor RHL1 {ECO:0000303|PubMed:19675148}; AltName: Full=Basic helix-loop-helix protein RHL1 {ECO:0000305}; AltName: Full=Protein ROOT HAIRLESS 1 {ECO:0000303|PubMed:19675148}; Short=LjRHL1 {ECO:0000303|PubMed:19675148};	A0A1U8BGR4_NELNU SubName: Full=transcription factor bHLH66 {ECO:0000313|RefSeq:XP_010275766.1, ECO:0000313|RefSeq:XP_019055536.1};	At2g24260	GO:0005634,nucleus; GO:0003677,DNA binding; GO:0046983,protein dimerization activity; GO:0003674,molecular_function; GO:0003676,nucleic acid binding; GO:0005488,binding; GO:0097159,organic cyclic compound binding; GO:1901363,heterocyclic compound binding; GO:0005515,protein binding; GO:0005575,cellular_component; GO:0005622,intracellular anatomical structure; GO:0043226,organelle; GO:0043227,memb…
evm.TU.scaffold_153.587/CpbHLH54	28.71	32.65	32.27	7.88	7.51	7.17	6.4	5.29	5.98	35.02	30.36	32.54	19.88	18.36	19.18	2.83	3.74	4.5	665	813	696	202	185	186	207	135	144	860	766	805	510	478	509	75	89	106	Chr4	9628097	9631490	+	EVM-prediction-scaffold_153.587	--	K22484 transcriptional regulator CBF1 | (RefSeq) transcription factor bHLH106-like (A)	--	PREDICTED: transcription factor bHLH30-like [Nelumbo nucifera]	BH030_ARATH RecName: Full=Transcription factor bHLH30; AltName: Full=Basic helix-loop-helix protein 30; Short=AtbHLH30; Short=bHLH 30; AltName: Full=Transcription factor EN 53; AltName: Full=bHLH transcription factor bHLH030;	A0A443P6Y8_9MAGN SubName: Full=Transcription factor bHLH30-like protein {ECO:0000313|EMBL:RWR86486.1};	At1g68810	GO:0005634,nucleus; GO:0003677,DNA binding; GO:0003700,DNA-binding transcription factor activity; GO:0046983,protein dimerization activity; GO:0006355,regulation of transcription, DNA-templated; GO:0003674,molecular_function; GO:0003676,nucleic acid binding; GO:0005488,binding; GO:0097159,organic cyclic compound binding; GO:1901363,heterocyclic compound binding; GO:0140110,transcription regulator…
evm.TU.scaffold_153.430/CpbHLH55	1.51	0.81	1.79	0.54	0.89	0.71	1.14	3.17	1.03	0.56	1.13	0.74	0.04	0.21	0	0.24	0.35	0.31	38	22	42	15	24	20	40	88	27	15	31	20	1	6	0	7	9	8	Chr4	12261615	12265040	+	EVM-prediction-scaffold_153.430	--	K20558 transcription factor SPEECHLESS | (RefSeq) transcription factor SPEECHLESS (A)	ko04016: MAPK signaling pathway - plant	PREDICTED: transcription factor SPEECHLESS [Ricinus communis]	SPCH_ARATH RecName: Full=Transcription factor SPEECHLESS {ECO:0000303|PubMed:17183265}; AltName: Full=Basic helix-loop-helix protein 98 {ECO:0000303|PubMed:12679534, ECO:0000303|PubMed:14600211}; Short=AtbHLH98 {ECO:0000303|PubMed:12679534, ECO:0000303|PubMed:14600211}; Short=bHLH 98 {ECO:0000303|PubMed:12679534, ECO:0000303|PubMed:14600211}; AltName: Full=Transcription factor EN 19 {ECO:0000303|…	B9RIM0_RICCO SubName: Full=DNA binding protein, putative {ECO:0000313|EMBL:EEF48992.1};	At5g53210	GO:0005634,nucleus; GO:0003677,DNA binding; GO:0001216,DNA-binding transcription activator activity; GO:0003700,DNA-binding transcription factor activity; GO:0046983,protein dimerization activity; GO:0010052,guard cell differentiation; GO:0045893,positive regulation of transcription, DNA-templated; GO:0047484,regulation of response to osmotic stress; GO:2000038,regulation of stomatal complex deve…
evm.TU.scaffold_153.356/CpbHLH56	0.07	0.07	0	1.31	2.11	1.81	0.88	0.4	0.7	0.48	0.27	0.75	0.26	0.77	1.14	1.4	1.34	2.35	1	1	0	20	31	28	17	6	10	7	4	11	4	12	18	22	19	33	Chr4	13316183	13317454	+	EVM-prediction-scaffold_153.356	--	--	--	PREDICTED: transcription factor bHLH92-like [Nelumbo nucifera]	BH148_ORYSJ RecName: Full=Transcription factor BHLH148 {ECO:0000305}; AltName: Full=Basic helix-loop-helix protein 148 {ECO:0000303|PubMed:20472752}; Short=OsbHLH148 {ECO:0000303|PubMed:20472752}; AltName: Full=bHLH transcription factor bHLH148 {ECO:0000305};	A0A3S3NKE4_9MAGN SubName: Full=Transcription factor bHLH92-like protein {ECO:0000313|EMBL:RWR89403.1};	At5g43650	GO:0005634,nucleus; GO:0003677,DNA binding; GO:0046983,protein dimerization activity; GO:0006355,regulation of transcription, DNA-templated; GO:0009414,response to water deprivation; GO:0003674,molecular_function; GO:0003676,nucleic acid binding; GO:0005488,binding; GO:0097159,organic cyclic compound binding; GO:1901363,heterocyclic compound binding; GO:0005515,protein binding; GO:0006139,nucleob…
evm.TU.scaffold_153.139/CpbHLH58	16.34	18.15	15.58	9.08	10.16	7.97	1.08	0.83	1.76	11.71	12.98	12.58	2.18	2.44	3.85	0.52	0.16	0.63	304	363	270	187	201	166	28	17	34	231	263	250	45	51	82	11	3	12	Chr4	16447235	16454242	+	EVM-prediction-scaffold_153.139	--	K20558 transcription factor SPEECHLESS | (RefSeq) transcription factor SPEECHLESS (A)	ko04016: MAPK signaling pathway - plant	hypothetical protein AQUCO_00500478v1 [Aquilegia coerulea]	BH094_ARATH RecName: Full=Transcription factor bHLH94; AltName: Full=Basic helix-loop-helix protein 94; Short=AtbHLH94; Short=bHLH 94; AltName: Full=Transcription factor EN 16; AltName: Full=bHLH transcription factor bHLH094;	A0A3S3NJP1_9MAGN SubName: Full=Transcription factor bHLH94-like protein {ECO:0000313|EMBL:RWR81016.1};	At1g22490	GO:0005634,nucleus; GO:0003700,DNA-binding transcription factor activity; GO:0000981,DNA-binding transcription factor activity, RNA polymerase II-specific; GO:0046983,protein dimerization activity; GO:0000978,RNA polymerase II cis-regulatory region sequence-specific DNA binding; GO:0006357,regulation of transcription by RNA polymerase II; GO:0006355,regulation of transcription, DNA-templated; GO:…
evm.TU.scaffold_153.56/CpbHLH60	14.22	12.06	14.58	3.87	4.68	4.52	20.13	17.82	18.98	9.87	8.46	9.47	9.09	8.96	10.11	22.05	25.47	21.6	329	300	314	99	115	117	650	454	456	242	213	234	233	233	268	583	606	508	Chr4	17495507	17500900	+	EVM-prediction-scaffold_153.56	--	K18878 BHLH transcription factor Upa20 | (RefSeq) Upa20; transcription factor bHLH137-like (A)	ko04626: Plant-pathogen interaction	PREDICTED: transcription factor bHLH129 isoform X1 [Elaeis guineensis]	BH128_ARATH RecName: Full=Transcription factor bHLH128; AltName: Full=Basic helix-loop-helix protein 128; Short=AtbHLH128; Short=bHLH 128; AltName: Full=Transcription factor EN 74; AltName: Full=bHLH transcription factor bHLH128;	A0A443N0G0_9MAGN SubName: Full=Transcription factor bHLH128-like protein {ECO:0000313|EMBL:RWR72023.1};	At1g05800_2	GO:0005829,cytosol; GO:0005634,nucleus; GO:0003700,DNA-binding transcription factor activity; GO:0000981,DNA-binding transcription factor activity, RNA polymerase II-specific; GO:0046983,protein dimerization activity; GO:0000978,RNA polymerase II cis-regulatory region sequence-specific DNA binding; GO:0000976,transcription regulatory region sequence-specific DNA binding; GO:0010119,regulation of …
evm.TU.scaffold_24.32/CpbHLH61	6.44	6.79	6.48	6.4	4.61	5.81	5.79	6.31	5.94	7.01	8.3	8.5	4.95	5.73	5.65	4.64	5.33	4.45	188	213	176	207	143	190	236	203	180	217	264	265	160	188	189	155	160	132	Chr4	19012949	19063734	+	MERGED:-EVM-prediction-scaffold_24.32%3B-EVM-prediction-scaffold_24.33	--	--	--	Myc-type [Macleaya cordata]	BIM2_ARATH RecName: Full=Transcription factor BIM2; AltName: Full=BES1-interacting Myc-like protein 2; AltName: Full=Basic helix-loop-helix protein 102; Short=AtbHLH102; Short=bHLH 102; AltName: Full=Transcription factor EN 125; AltName: Full=bHLH transcription factor bHLH102;	A0A443P2E8_9MAGN SubName: Full=Transcription factor BIM2 isoform X1 {ECO:0000313|EMBL:RWR84973.1};	At1g69010	GO:0005634,nucleus; GO:0003700,DNA-binding transcription factor activity; GO:0042802,identical protein binding; GO:0046983,protein dimerization activity; GO:0000976,transcription regulatory region sequence-specific DNA binding; GO:0006351,transcription, DNA-templated; GO:0003674,molecular_function; GO:0140110,transcription regulator activity; GO:0005488,binding; GO:0005515,protein binding; GO:000…
evm.TU.scaffold_24.170/CpbHLH62	1.87	2.73	1.72	10.86	9.92	7.75	12.58	5.7	13.5	4.28	3.07	3.94	11.15	10.04	7.93	12.21	11.3	14.71	28	44	24	180	158	130	263	94	210	68	50	63	185	169	136	209	174	224	Chr4	22139281	22141697	+	EVM-prediction-scaffold_24.170	--	--	--	transcription factor bHLH147-like [Dendrobium catenatum]	BH149_ARATH RecName: Full=Transcription factor bHLH149; AltName: Full=ATBS1 interacting factor 4; AltName: Full=Basic helix-loop-helix protein 149; Short=AtbHLH149; Short=bHLH 149; AltName: Full=Transcription factor EN 144; AltName: Full=bHLH transcription factor bHLH149;	A0A3S3MSS1_9MAGN SubName: Full=Transcription factor bHLH147-like protein {ECO:0000313|EMBL:RWR89082.1};	At1g09250	GO:0005634,nucleus; GO:0003677,DNA binding; GO:0003700,DNA-binding transcription factor activity; GO:0046983,protein dimerization activity; GO:0003674,molecular_function; GO:0003676,nucleic acid binding; GO:0005488,binding; GO:0097159,organic cyclic compound binding; GO:1901363,heterocyclic compound binding; GO:0140110,transcription regulator activity; GO:0005515,protein binding; GO:0005575,cellu…
evm.TU.scaffold_24.277/CpbHLH63	0.64	0.66	0.53	0.83	1	0.7	0.31	0.84	0.27	0.6	0.91	1.6	0.77	0.44	0.25	0.99	1.52	1.26	9	10	7	13	15	11	6	13	4	9	14	24	12	7	4	16	22	18	Chr4	24517715	24521832	-	EVM-prediction-scaffold_24.277	--	--	--	PREDICTED: transcription factor bHLH36-like [Nelumbo nucifera]	BH162_ARATH RecName: Full=Transcription factor bHLH162; AltName: Full=Basic helix-loop-helix protein 162; Short=AtbHLH162 {ECO:0000303|PubMed:14600211}; Short=bHLH 162; AltName: Full=bHLH transcription factor bHLH162;	A0A3S3R9N1_9MAGN SubName: Full=Transcription factor bHLH36-like protein {ECO:0000313|EMBL:RWR97419.1};	At4g20970	GO:0090575,RNA polymerase II transcription regulator complex; GO:0003700,DNA-binding transcription factor activity; GO:0000981,DNA-binding transcription factor activity, RNA polymerase II-specific; GO:0046983,protein dimerization activity; GO:0000977,RNA polymerase II transcription regulatory region sequence-specific DNA binding; GO:0050832,defense response to fungus; GO:0006357,regulation of tra…
evm.TU.scaffold_907.22/CpbHLH64	53.03	62.07	60.85	42.2	35.14	35.79	46.55	33.28	49.87	62.84	66.6	65.2	55.87	58.7	61.53	46.89	46.87	46.07	1389	1748	1484	1224	979	1050	1702	960	1357	1745	1900	1824	1621	1728	1847	1404	1263	1227	Chr4	27381728	27397387	+	EVM-prediction-scaffold_907.22	--	K12126 phytochrome-interacting factor 3 | (RefSeq) transcription factor PIF3-like isoform X1 (A)	ko04075: Plant hormone signal transduction; ko04712: Circadian rhythm - plant	PREDICTED: transcription factor UNE12-like isoform X3 [Nelumbo nucifera]	UNE12_ARATH RecName: Full=Transcription factor UNE12; AltName: Full=Basic helix-loop-helix protein 59; Short=AtbHLH59; Short=bHLH 59; AltName: Full=Protein UNFERTILIZED EMBRYO SAC 12; AltName: Full=Transcription factor EN 93; AltName: Full=bHLH transcription factor bHLH059;	A0A1U7ZFM7_NELNU SubName: Full=transcription factor UNE12-like isoform X3 {ECO:0000313|RefSeq:XP_010246321.1};	At4g02590	GO:0005634,nucleus; GO:0003700,DNA-binding transcription factor activity; GO:0000981,DNA-binding transcription factor activity, RNA polymerase II-specific; GO:0046983,protein dimerization activity; GO:0000978,RNA polymerase II cis-regulatory region sequence-specific DNA binding; GO:0009567,double fertilization forming a zygote and endosperm; GO:0007275,multicellular organism development; GO:00313…
evm.TU.scaffold_138.9/CpbHLH65	2.25	2.4	2.33	13.91	15.03	16.51	9.96	9.3	6.49	0.39	0.69	0.7	1.43	1.63	2.33	7.07	5.99	8.44	27	31	26	185	192	222	167	123	81	5	9	9	19	22	32	97	74	103	Chr4	58871506	58874181	-	EVM-prediction-scaffold_138.9	--	K22484 transcriptional regulator CBF1 | (RefSeq) transcription factor bHLH106-like (A)	--	PREDICTED: transcription factor bHLH51-like [Malus domestica]	BH030_ARATH RecName: Full=Transcription factor bHLH30; AltName: Full=Basic helix-loop-helix protein 30; Short=AtbHLH30; Short=bHLH 30; AltName: Full=Transcription factor EN 53; AltName: Full=bHLH transcription factor bHLH030;	A0A3S4NLQ4_9MAGN SubName: Full=Transcription factor bHLH51-like protein {ECO:0000313|EMBL:RWR78869.1};	At1g68810	GO:0005634,nucleus; GO:0003677,DNA binding; GO:0003700,DNA-binding transcription factor activity; GO:0046983,protein dimerization activity; GO:0006355,regulation of transcription, DNA-templated; GO:0003674,molecular_function; GO:0003676,nucleic acid binding; GO:0005488,binding; GO:0097159,organic cyclic compound binding; GO:1901363,heterocyclic compound binding; GO:0140110,transcription regulator…
evm.TU.scaffold_176.125/CpbHLH66	38.2	41.78	39.58	9.85	10.8	9.9	19.96	25.85	21.46	26.37	26.37	25.97	11.89	11.24	9.76	4.89	7.24	6.17	1503	1767	1450	429	452	436	1096	1120	877	1100	1130	1091	518	497	440	220	293	247	Chr4	61877598	61889265	+	EVM-prediction-scaffold_176.125	--	K13422 transcription factor MYC2 | (RefSeq) transcription factor MYC4 (A)	ko04016: MAPK signaling pathway - plant; ko04075: Plant hormone signal transduction	PREDICTED: transcription factor GLABRA 3-like [Nelumbo nucifera]	GL3_ARATH RecName: Full=Transcription factor GLABRA 3; AltName: Full=Basic helix-loop-helix protein 1; Short=AtMYC6; Short=AtbHLH1; Short=bHLH 1; AltName: Full=Protein SHAPESHIFTER; AltName: Full=Transcription factor EN 31; AltName: Full=bHLH transcription factor bHLH001;	A0A3S4N375_9MAGN SubName: Full=Transcription factor GLABRA 3-like protein {ECO:0000313|EMBL:RWR72192.1};	At1g63650	GO:0005634,nucleus; GO:0003677,DNA binding; GO:0003700,DNA-binding transcription factor activity; GO:0046983,protein dimerization activity; GO:0001708,cell fate specification; GO:0009957,epidermal cell fate specification; GO:0009867,jasmonic acid mediated signaling pathway; GO:0007275,multicellular organism development; GO:0031542,positive regulation of anthocyanin biosynthetic process; GO:001009…
evm.TU.scaffold_176.226/CpbHLH67	6.67	6.9	6.26	6.11	6.05	5.04	10.93	10.97	8.94	4.31	5.01	2.58	2.27	3.61	3.74	16.81	15.1	14.91	143	159	125	145	138	121	327	259	199	98	117	59	54	87	92	412	333	325	Chr4	63973631	63980236	+	EVM-prediction-scaffold_176.226	--	--	--	Myc-type [Macleaya cordata]	ILR3_ARATH RecName: Full=Transcription factor ILR3; AltName: Full=Basic helix-loop-helix protein 105; Short=AtbHLH105; Short=bHLH 105; AltName: Full=Protein IAA-LEUCINE RESISTANT 3; AltName: Full=Transcription factor EN 133; AltName: Full=bHLH transcription factor bHLH105;	A0A200R4Y5_9MAGN SubName: Full=Myc-type {ECO:0000313|EMBL:OVA17777.1};	At5g54680	GO:0005634,nucleus; GO:0003700,DNA-binding transcription factor activity; GO:0046983,protein dimerization activity; GO:0000976,transcription regulatory region sequence-specific DNA binding; GO:0019760,glucosinolate metabolic process; GO:0006355,regulation of transcription, DNA-templated; GO:0003674,molecular_function; GO:0140110,transcription regulator activity; GO:0005488,binding; GO:0005515,pro…
evm.TU.scaffold_18.530/CpbHLH68	10.86	13.97	10.6	39.32	38.69	34.96	10.56	12.92	11.1	12.44	12.5	12.39	13.49	14.57	15.54	11.83	14.93	14.47	426	589	387	1707	1613	1535	578	558	452	517	534	519	586	642	698	530	602	577	Chr5	359411	366914	-	EVM-prediction-scaffold_18.530	--	K18878 BHLH transcription factor Upa20 | (RefSeq) Upa20; transcription factor bHLH137-like (A)	ko04626: Plant-pathogen interaction	PREDICTED: transcription factor bHLH79-like isoform X2 [Nelumbo nucifera]	BH094_ORYSJ RecName: Full=Transcription factor BHLH094 {ECO:0000305}; AltName: Full=Basic helix-loop-helix protein 94 {ECO:0000303|PubMed:16896230}; Short=OsbHLH094 {ECO:0000303|PubMed:16896230}; AltName: Full=bHLH transcription factor bHLH094 {ECO:0000305};	A0A3S3MUT0_9MAGN SubName: Full=Transcription factor bHLH1 {ECO:0000313|EMBL:RWR82785.1};	At1g59640	GO:0005634,nucleus; GO:0003677,DNA binding; GO:0003700,DNA-binding transcription factor activity; GO:0046983,protein dimerization activity; GO:0006355,regulation of transcription, DNA-templated; GO:0003674,molecular_function; GO:0003676,nucleic acid binding; GO:0005488,binding; GO:0097159,organic cyclic compound binding; GO:1901363,heterocyclic compound binding; GO:0140110,transcription regulator…
evm.TU.scaffold_18.431/CpbHLH69	21.28	21.12	23.62	7.68	6.62	5.72	13.11	17.39	14.1	21	22.2	21.85	16.12	19.33	21.91	13.2	16.53	17.87	478	510	494	191	158	144	411	430	329	500	543	524	401	488	564	339	382	408	Chr5	1543735	1546753	+	EVM-prediction-scaffold_18.431	--	K18878 BHLH transcription factor Upa20 | (RefSeq) Upa20; transcription factor bHLH137-like (A)	ko04626: Plant-pathogen interaction	PREDICTED: transcription factor bHLH130-like isoform X3 [Nelumbo nucifera]	BH130_ARATH RecName: Full=Transcription factor bHLH130; AltName: Full=Basic helix-loop-helix protein 130; Short=AtbHLH130; Short=bHLH 130; AltName: Full=Transcription factor EN 69; AltName: Full=bHLH transcription factor bHLH130;	A0A3S3MJX8_9MAGN SubName: Full=Transcription factor bHLH130-like protein isoform X1 {ECO:0000313|EMBL:RWR77788.1};	At2g42280	GO:0005634,nucleus; GO:0003700,DNA-binding transcription factor activity; GO:0000981,DNA-binding transcription factor activity, RNA polymerase II-specific; GO:0046983,protein dimerization activity; GO:0000978,RNA polymerase II cis-regulatory region sequence-specific DNA binding; GO:0048573,photoperiodism, flowering; GO:0006357,regulation of transcription by RNA polymerase II; GO:0006355,regulatio…
evm.TU.scaffold_18.355/CpbHLH70	40.73	39.97	34.7	3.62	3.97	3.77	12.4	17.26	11.76	25.59	27.31	26.78	10.29	10.6	9.47	1.65	0.98	2.14	1494	1576	1185	147	155	155	635	697	448	995	1091	1049	418	437	398	69	37	80	Chr5	2611019	2614334	+	EVM-prediction-scaffold_18.355	--	K13422 transcription factor MYC2 | (RefSeq) transcription factor MYC4-like (A)	ko04016: MAPK signaling pathway - plant; ko04075: Plant hormone signal transduction	transcription factor bHLH [Vitis vinifera]	BH093_ARATH RecName: Full=Transcription factor bHLH93; AltName: Full=Basic helix-loop-helix protein 93; Short=AtbHLH93; Short=bHLH 93; AltName: Full=Transcription factor EN 47; AltName: Full=bHLH transcription factor bHLH093;	A0A3S3NE67_9MAGN SubName: Full=Transcription factor bHLH93 {ECO:0000313|EMBL:RWR77887.1};	At5g65640	GO:0005634,nucleus; GO:0003700,DNA-binding transcription factor activity; GO:0046983,protein dimerization activity; GO:0043565,sequence-specific DNA binding; GO:0045487,gibberellin catabolic process; GO:0007275,multicellular organism development; GO:0010371,regulation of gibberellin biosynthetic process; GO:0006355,regulation of transcription, DNA-templated; GO:0003674,molecular_function; GO:0140…
evm.TU.scaffold_18.346/CpbHLH71	0	0	0	2.53	3.09	2.01	1.61	1.04	1.76	0	0	0	1.37	1.35	0.97	4.87	5.68	5.47	0	0	0	81	95	65	65	33	53	0	0	0	44	44	32	161	169	161	Chr5	2776128	2779553	+	EVM-prediction-scaffold_18.346	--	K13422 transcription factor MYC2 | (RefSeq) transcription factor MYC2 (A)	ko04016: MAPK signaling pathway - plant; ko04075: Plant hormone signal transduction	hypothetical protein AQUCO_01000012v1 [Aquilegia coerulea]	BH025_ARATH RecName: Full=Transcription factor bHLH25; AltName: Full=Basic helix-loop-helix protein 25; Short=AtbHLH25; Short=bHLH 25; AltName: Full=Transcription factor EN 29; AltName: Full=bHLH transcription factor bHLH025;	A0A443N676_9MAGN SubName: Full=Transcription factor bHLH18-like protein {ECO:0000313|EMBL:RWR74042.1};	At4g37850	GO:0005634,nucleus; GO:0003700,DNA-binding transcription factor activity; GO:0046983,protein dimerization activity; GO:0000976,transcription regulatory region sequence-specific DNA binding; GO:0006355,regulation of transcription, DNA-templated; GO:0003674,molecular_function; GO:0140110,transcription regulator activity; GO:0005488,binding; GO:0005515,protein binding; GO:0001067,regulatory region n…
evm.TU.scaffold_18.167/CpbHLH73	27.71	28.7	30.76	21	22.64	20.63	13.75	14.61	14.15	16.31	19.41	19.92	15.18	15.67	18.41	12.29	13.35	15.27	801	892	828	672	696	668	555	465	425	500	611	615	486	509	610	406	397	449	Chr5	4938773	4954231	-	EVM-prediction-scaffold_18.167	--	K12126 phytochrome-interacting factor 3 | (RefSeq) uncharacterized protein LOC112286119 (A)	ko04075: Plant hormone signal transduction; ko04712: Circadian rhythm - plant	Myc-type [Macleaya cordata]	SPT_ARATH RecName: Full=Transcription factor SPATULA; AltName: Full=Basic helix-loop-helix protein 24; Short=AtbHLH24; Short=bHLH 24; AltName: Full=Transcription factor EN 99; AltName: Full=bHLH transcription factor bHLH024;	A0A3S3MD39_9MAGN SubName: Full=Transcription factor bHLH23 {ECO:0000313|EMBL:RWR77566.1};	At4g36930	GO:0005634,nucleus; GO:0003700,DNA-binding transcription factor activity; GO:0042802,identical protein binding; GO:0046983,protein dimerization activity; GO:0000976,transcription regulatory region sequence-specific DNA binding; GO:0048440,carpel development; GO:0007623,circadian rhythm; GO:0010154,fruit development; GO:0010187,negative regulation of seed germination; GO:0009409,response to cold; …
evm.TU.scaffold_5.167/CpbHLH74	0.26	0.05	0.22	0.14	0.05	0.05	0.88	2.29	1.29	0.1	0	0.19	0.23	0	0.13	1.62	0.75	0.56	5	1	4	3	1	1	24	49	26	2	0	4	5	0	3	36	15	11	Chr5	10246534	10248851	+	EVM-prediction-scaffold_5.167	--	K13422 transcription factor MYC2 | (RefSeq) transcription factor MYC2-like (A)	ko04016: MAPK signaling pathway - plant; ko04075: Plant hormone signal transduction	PREDICTED: putative transcription factor bHLH041 [Elaeis guineensis]	BH041_ARATH RecName: Full=Putative transcription factor bHLH041; AltName: Full=Basic helix-loop-helix protein 41; Short=AtbHLH41; Short=bHLH 41; AltName: Full=Transcription factor EN 51; AltName: Full=bHLH transcription factor bHLH041;	A0A3S3Q3M0_9MAGN SubName: Full=Putative transcription factor bHLH041 {ECO:0000313|EMBL:RWR78065.1};	At5g56960	GO:0005634,nucleus; GO:0003677,DNA binding; GO:0003700,DNA-binding transcription factor activity; GO:0046983,protein dimerization activity; GO:0006355,regulation of transcription, DNA-templated; GO:0010200,response to chitin; GO:0003674,molecular_function; GO:0003676,nucleic acid binding; GO:0005488,binding; GO:0097159,organic cyclic compound binding; GO:1901363,heterocyclic compound binding; GO:…
evm.TU.scaffold_5.11/CpbHLH75	14.91	16.23	13.13	13.71	10.74	12.25	18.88	22.35	18.01	14.72	18.75	15.93	17.7	18.82	18.4	31.23	31.01	31.58	616	721	505	627	472	567	1089	1017	773	645	844	703	810	874	871	1475	1318	1327	Chr5	12508316	12520097	-	EVM-prediction-scaffold_5.11	--	--	--	PREDICTED: transcription factor BIM2 isoform X1 [Nelumbo nucifera]	BIM2_ARATH RecName: Full=Transcription factor BIM2; AltName: Full=BES1-interacting Myc-like protein 2; AltName: Full=Basic helix-loop-helix protein 102; Short=AtbHLH102; Short=bHLH 102; AltName: Full=Transcription factor EN 125; AltName: Full=bHLH transcription factor bHLH102;	A0A443P2E8_9MAGN SubName: Full=Transcription factor BIM2 isoform X1 {ECO:0000313|EMBL:RWR84973.1};	At1g69010	GO:0005634,nucleus; GO:0003700,DNA-binding transcription factor activity; GO:0042802,identical protein binding; GO:0046983,protein dimerization activity; GO:0000976,transcription regulatory region sequence-specific DNA binding; GO:0006351,transcription, DNA-templated; GO:0003674,molecular_function; GO:0140110,transcription regulator activity; GO:0005488,binding; GO:0005515,protein binding; GO:000…
evm.TU.scaffold_23.121/CpbHLH76	14.72	14.16	16.39	10.75	10.14	11.82	16.05	15.5	14.21	18.41	21	21.25	19.35	15.47	14.73	18.59	17.6	18.95	408	422	423	330	299	367	621	473	409	541	634	629	594	482	468	589	502	534	Chr5	21149016	21161602	-	EVM-prediction-scaffold_23.121	--	K18878 BHLH transcription factor Upa20 | (RefSeq) Upa20; transcription factor bHLH137-like (A)	ko04626: Plant-pathogen interaction	PREDICTED: transcription factor bHLH128-like [Nelumbo nucifera]	BH128_ARATH RecName: Full=Transcription factor bHLH128; AltName: Full=Basic helix-loop-helix protein 128; Short=AtbHLH128; Short=bHLH 128; AltName: Full=Transcription factor EN 74; AltName: Full=bHLH transcription factor bHLH128;	A0A443N0G0_9MAGN SubName: Full=Transcription factor bHLH128-like protein {ECO:0000313|EMBL:RWR72023.1};	At1g05800_2	GO:0005829,cytosol; GO:0005634,nucleus; GO:0003700,DNA-binding transcription factor activity; GO:0000981,DNA-binding transcription factor activity, RNA polymerase II-specific; GO:0046983,protein dimerization activity; GO:0000978,RNA polymerase II cis-regulatory region sequence-specific DNA binding; GO:0000976,transcription regulatory region sequence-specific DNA binding; GO:0010119,regulation of …
evm.TU.scaffold_250.23/CpbHLH77	30.92	33.08	29.6	7.93	9.88	7.63	33.62	37.78	29.64	40.28	37.83	38.92	22.62	29.42	26.19	113.02	112.59	116.36	680	782	606	193	231	188	1032	915	677	939	906	914	551	727	660	2841	2547	2602	Chr5	53942914	53947043	-	EVM-prediction-scaffold_250.23	--	K13422 transcription factor MYC2 | (RefSeq) transcription factor MYC3-like isoform X1 (A)	ko04016: MAPK signaling pathway - plant; ko04075: Plant hormone signal transduction	PREDICTED: transcription factor bHLH35-like [Pyrus x bretschneideri]	BH035_ARATH RecName: Full=Transcription factor bHLH35; AltName: Full=Basic helix-loop-helix protein 35; Short=AtbHLH35; Short=bHLH 35; AltName: Full=Transcription factor EN 41; AltName: Full=bHLH transcription factor bHLH035;	A0A443N9P0_9MAGN SubName: Full=Transcription factor bHLH35-like protein {ECO:0000313|EMBL:RWR75235.1};	At5g57150	GO:0005634,nucleus; GO:0003700,DNA-binding transcription factor activity; GO:0046983,protein dimerization activity; GO:0043565,sequence-specific DNA binding; GO:0006355,regulation of transcription, DNA-templated; GO:0003674,molecular_function; GO:0140110,transcription regulator activity; GO:0005488,binding; GO:0005515,protein binding; GO:0003676,nucleic acid binding; GO:0003677,DNA binding; GO:00…
evm.TU.scaffold_731.73/CpbHLH78	0	0.69	0.28	0.28	0.78	1.02	3.15	2.43	3.21	0	0.04	0.08	0	0.08	0	3.57	3.5	3.54	0	17	6	7	19	26	100	61	76	0	1	2	0	2	0	93	82	82	Chr5	59034793	59042449	+	EVM-prediction-scaffold_731.73	--	K12126 phytochrome-interacting factor 3 | (RefSeq) uncharacterized protein LOC112286119 (A)	ko04075: Plant hormone signal transduction; ko04712: Circadian rhythm - plant	PREDICTED: transcription factor PIF7 [Theobroma cacao]	PIF7_ARATH RecName: Full=Transcription factor PIF7; AltName: Full=Basic helix-loop-helix protein 72; Short=AtbHLH72; Short=bHLH 72; AltName: Full=Phytochrome-interacting factor 7; AltName: Full=Transcription factor EN 109; AltName: Full=bHLH transcription factor bHLH072;	A0A3S3M498_9MAGN SubName: Full=DNA binding protein, putative isoform 1 {ECO:0000313|EMBL:RWR72982.1};	At4g36930	GO:0016607,nuclear speck; GO:0005634,nucleus; GO:0003700,DNA-binding transcription factor activity; GO:0003690,double-stranded DNA binding; GO:0046983,protein dimerization activity; GO:0009704,de-etiolation; GO:0009585,red, far-red light phototransduction; GO:0006355,regulation of transcription, DNA-templated; GO:0009416,response to light stimulus; GO:0003674,molecular_function; GO:0140110,transc…
evm.TU.scaffold_179.88/CpbHLH81	11.07	9.94	10.35	5.83	5.47	5.34	9.64	11.84	11.01	9.58	10.9	9.69	10.07	9.8	9.32	5.67	6.3	6.26	400	386	348	233	210	216	486	471	413	367	429	374	403	398	386	234	234	230	Chr5	63943458	63947963	+	EVM-prediction-scaffold_179.88	--	--	--	PREDICTED: transcription factor bHLH130-like isoform X1 [Nelumbo nucifera]	BH130_ARATH RecName: Full=Transcription factor bHLH130; AltName: Full=Basic helix-loop-helix protein 130; Short=AtbHLH130; Short=bHLH 130; AltName: Full=Transcription factor EN 69; AltName: Full=bHLH transcription factor bHLH130;	A0A443N5K9_9MAGN SubName: Full=Transcription factor bHLH130-like protein isoform X3 {ECO:0000313|EMBL:RWR73800.1};	At2g42280	GO:0005634,nucleus; GO:0003700,DNA-binding transcription factor activity; GO:0000981,DNA-binding transcription factor activity, RNA polymerase II-specific; GO:0046983,protein dimerization activity; GO:0000978,RNA polymerase II cis-regulatory region sequence-specific DNA binding; GO:0048573,photoperiodism, flowering; GO:0006357,regulation of transcription by RNA polymerase II; GO:0006355,regulatio…
evm.TU.scaffold_64.63/CpbHLH82	40.76	42.08	41.8	104.98	107.56	101.65	61.32	62.32	58.67	38.67	42.83	35.35	51.16	56.84	49.87	89.36	93.74	92.42	1192	1323	1138	3399	3345	3329	2503	2007	1782	1199	1364	1104	1657	1868	1671	2987	2820	2748	Chr6	20660371	20667963	+	EVM-prediction-scaffold_64.63	--	--	--	PREDICTED: transcription factor bHLH115-like [Elaeis guineensis]	BH115_ARATH RecName: Full=Transcription factor bHLH115; AltName: Full=Basic helix-loop-helix protein 115; Short=AtbHLH115; Short=bHLH 115; AltName: Full=Transcription factor EN 134; AltName: Full=bHLH transcription factor bHLH115;	A0A443PI60_9MAGN SubName: Full=Transcription factor ILR3-like protein isoform X2 {ECO:0000313|EMBL:RWR90468.1};	At1g51070	GO:0005634,nucleus; GO:0003677,DNA binding; GO:0046983,protein dimerization activity; GO:0003674,molecular_function; GO:0003676,nucleic acid binding; GO:0005488,binding; GO:0097159,organic cyclic compound binding; GO:1901363,heterocyclic compound binding; GO:0005515,protein binding; GO:0005575,cellular_component; GO:0005622,intracellular anatomical structure; GO:0043226,organelle; GO:0043227,memb…
evm.TU.scaffold_147.125/CpbHLH83	5.48	6.15	4.76	1.6	1.59	1.49	1.82	2.85	1.98	3.5	3.57	2.98	4.46	4.39	4.55	1.11	1.43	1.27	272	328	220	88	84	83	126	156	102	184	193	158	245	245	259	63	73	64	Chr6	25393351	25398729	+	EVM-prediction-scaffold_147.125	--	K18878 BHLH transcription factor Upa20 | (RefSeq) Upa20; transcription factor bHLH137-like (A)	ko04626: Plant-pathogen interaction	Myc-type [Macleaya cordata]	BH063_ARATH RecName: Full=Transcription factor bHLH63; AltName: Full=Basic helix-loop-helix protein 63; Short=AtbHLH63; Short=bHLH 63; AltName: Full=Protein CRYPTOCHROME INTERACTING BASIC-HELIX-LOOP-HELIX 1; AltName: Full=Transcription factor EN 84; AltName: Full=bHLH transcription factor bHLH063;	A0A443NV37_9MAGN SubName: Full=Transcription factor bHLH63-like protein {ECO:0000313|EMBL:RWR82407.1};	At4g34530	GO:0005634,nucleus; GO:0003677,DNA binding; GO:0003700,DNA-binding transcription factor activity; GO:0046983,protein dimerization activity; GO:0009908,flower development; GO:0045824,negative regulation of innate immune response; GO:0009911,positive regulation of flower development; GO:0009637,response to blue light; GO:0006351,transcription, DNA-templated; GO:0003674,molecular_function; GO:000367…
evm.TU.scaffold_147.57/CpbHLH84	2.66	1.8	2.07	0.71	1.13	0.57	1.36	2.28	2.42	1.27	1.34	1.59	0.9	1.3	0.92	0.23	0.85	1.04	91	66	66	27	41	22	65	86	86	46	50	58	34	50	36	9	30	36	Chr6	26960899	26973068	-	EVM-prediction-scaffold_147.57	--	K05765 cofilin | (RefSeq) uncharacterized LOC105781290 (A)	--	PREDICTED: transcription factor bHLH110-like isoform X1 [Nelumbo nucifera]	BH110_ARATH RecName: Full=Transcription factor bHLH110; AltName: Full=Basic helix-loop-helix protein 110; Short=AtbHLH110; Short=bHLH 110; AltName: Full=Transcription factor EN 59; AltName: Full=bHLH transcription factor bHLH110;	A0A3S3MZE5_9MAGN SubName: Full=Transcription factor bHLH110-like protein isoform X1 {ECO:0000313|EMBL:RWR82448.1};	At1g27660	GO:0005634,nucleus; GO:0003700,DNA-binding transcription factor activity; GO:0000981,DNA-binding transcription factor activity, RNA polymerase II-specific; GO:0046983,protein dimerization activity; GO:0000978,RNA polymerase II cis-regulatory region sequence-specific DNA binding; GO:0006357,regulation of transcription by RNA polymerase II; GO:0003674,molecular_function; GO:0140110,transcription re…
evm.TU.scaffold_35.39/CpbHLH86	43.46	41.93	45.13	62.05	66.9	66.16	11.85	17.94	12.17	37.62	34.82	37.02	43.96	47.02	42.22	8.19	8.52	7.84	2083	2161	2014	3293	3410	3552	793	947	606	1912	1818	1895	2334	2533	2319	449	420	382	Chr6	41507455	41515181	+	EVM-prediction-scaffold_35.39	--	K18878 BHLH transcription factor Upa20 | (RefSeq) Upa20; transcription factor bHLH137-like (A)	ko04626: Plant-pathogen interaction	Myc-type [Macleaya cordata]	BH049_ARATH RecName: Full=Transcription factor bHLH49; AltName: Full=Basic helix-loop-helix protein 49; Short=AtbHLH49; Short=bHLH 49; AltName: Full=Protein ACTIVATOR FOR CELL ELONGATION 1; AltName: Full=Transcription factor EN 82; AltName: Full=bHLH transcription factor bHLH049;	A0A443PW54_9MAGN RecName: Full=BHLH domain-containing protein {ECO:0000259|PROSITE:PS50888};	At1g68920	GO:0005634,nucleus; GO:0003700,DNA-binding transcription factor activity; GO:0046983,protein dimerization activity; GO:0000976,transcription regulatory region sequence-specific DNA binding; GO:0040008,regulation of growth; GO:0006355,regulation of transcription, DNA-templated; GO:0003674,molecular_function; GO:0140110,transcription regulator activity; GO:0005488,binding; GO:0005515,protein bindin…
evm.TU.scaffold_35.57/CpbHLH87	10.8	13.69	12.96	83.57	71.97	78.03	14.3	18.41	14.57	16.58	16.23	14.52	29.91	34.9	27.39	12.73	15.49	12.75	204	278	228	1748	1446	1651	377	383	286	332	334	293	626	741	593	275	301	245	Chr6	41676543	41685259	+	EVM-prediction-scaffold_35.57	--	K16189 phytochrome-interacting factor 4 | (Kazusa) Lj0g3v0084249.1; - (A)	ko04075: Plant hormone signal transduction	PREDICTED: transcription factor BIM2 isoform X1 [Nelumbo nucifera]	BIM1_ARATH RecName: Full=Transcription factor BIM1; AltName: Full=BES1-interacting Myc-like protein 1; AltName: Full=Basic helix-loop-helix protein 46; Short=AtbHLH46; Short=bHLH 46; AltName: Full=Transcription factor EN 126; AltName: Full=bHLH transcription factor bHLH046;	A0A443P2E8_9MAGN SubName: Full=Transcription factor BIM2 isoform X1 {ECO:0000313|EMBL:RWR84973.1};	At5g08130	GO:0005634,nucleus; GO:0003677,DNA binding; GO:0003700,DNA-binding transcription factor activity; GO:0042802,identical protein binding; GO:0046983,protein dimerization activity; GO:0006351,transcription, DNA-templated; GO:0003674,molecular_function; GO:0003676,nucleic acid binding; GO:0005488,binding; GO:0097159,organic cyclic compound binding; GO:1901363,heterocyclic compound binding; GO:0140110…
evm.TU.scaffold_96.612/CpbHLH88	9.61	6.93	8.46	23.66	19.92	16.42	5.59	4.87	4.23	1.05	2.3	0.98	1.7	3.84	3.04	15.36	13.14	12.88	138	107	113	376	304	264	112	77	63	16	36	15	27	62	50	252	194	188	Chr6	49806563	49807865	+	EVM-prediction-scaffold_96.612	--	--	--	transcription factor ILI6-like [Herrania umbratica]	ILI6_ORYSI RecName: Full=Transcription factor ILI6; Short=OsILI6; AltName: Full=Protein INCREASED LEAF INCLINATION 6;	A0A6J1AJ71_9ROSI SubName: Full=transcription factor ILI6-like {ECO:0000313|RefSeq:XP_021286881.1};	At1g74500	GO:0005634,nucleus; GO:0046983,protein dimerization activity; GO:0009742,brassinosteroid mediated signaling pathway; GO:0080113,regulation of seed growth; GO:0006355,regulation of transcription, DNA-templated; GO:0003674,molecular_function; GO:0005488,binding; GO:0005515,protein binding; GO:0007154,cell communication; GO:0007165,signal transduction; GO:0008150,biological_process; GO:0009719,respo…
evm.TU.scaffold_96.505/CpbHLH89	0.13	1.23	0.19	0.08	0	0.16	0.38	0.24	0.04	0.71	0.69	0.78	0.04	0.08	0	1.43	1.16	1.13	3	30	4	2	0	4	12	6	1	17	17	19	1	2	0	37	27	26	Chr6	51197287	51200087	-	EVM-prediction-scaffold_96.505	--	K20558 transcription factor SPEECHLESS | (RefSeq) transcription factor SPEECHLESS-like (A)	ko04016: MAPK signaling pathway - plant	PREDICTED: transcription factor bHLH96 [Nelumbo nucifera]	BH094_ARATH RecName: Full=Transcription factor bHLH94; AltName: Full=Basic helix-loop-helix protein 94; Short=AtbHLH94; Short=bHLH 94; AltName: Full=Transcription factor EN 16; AltName: Full=bHLH transcription factor bHLH094;	A0A443P026_9MAGN SubName: Full=Transcription factor bHLH96 {ECO:0000313|EMBL:RWR84101.1};	At1g22490	GO:0005634,nucleus; GO:0003700,DNA-binding transcription factor activity; GO:0000981,DNA-binding transcription factor activity, RNA polymerase II-specific; GO:0046983,protein dimerization activity; GO:0000978,RNA polymerase II cis-regulatory region sequence-specific DNA binding; GO:0006357,regulation of transcription by RNA polymerase II; GO:0006355,regulation of transcription, DNA-templated; GO:…
evm.TU.scaffold_162.252/CpbHLH91	8.59	8.51	6.41	0	0.43	0.27	0.18	0.37	0.1	4.86	5.52	7.05	0.05	0.22	0.4	0.53	0.39	1.29	170	181	118	0	9	6	5	8	2	102	119	149	1	5	9	12	8	26	Chr7	6070638	6074696	-	EVM-prediction-scaffold_162.252	--	--	--	PREDICTED: transcription factor bHLH118 [Vitis vinifera]	BH120_ARATH RecName: Full=Transcription factor bHLH120; AltName: Full=Basic helix-loop-helix protein 120; Short=AtbHLH120; Short=bHLH 120; AltName: Full=Transcription factor EN 4; AltName: Full=bHLH transcription factor bHLH120;	A0A3S3MTD7_9MAGN SubName: Full=Transcription factor bHLH118 {ECO:0000313|EMBL:RWR89423.1};	At5g51790	GO:0090575,RNA polymerase II transcription regulator complex; GO:0003700,DNA-binding transcription factor activity; GO:0000981,DNA-binding transcription factor activity, RNA polymerase II-specific; GO:0046983,protein dimerization activity; GO:0000977,RNA polymerase II transcription regulatory region sequence-specific DNA binding; GO:0006357,regulation of transcription by RNA polymerase II; GO:000…
evm.TU.scaffold_162.154/CpbHLH92	8.36	10.17	8.23	0.5	1.44	0.4	1.75	2.56	1.21	5.36	5.79	4.79	0.91	1.46	1.43	0.79	0.27	0.55	240	314	220	16	44	13	70	81	36	163	181	147	29	47	47	26	8	16	Chr7	7409871	7412561	-	EVM-prediction-scaffold_162.154	--	K20558 transcription factor SPEECHLESS | (RefSeq) transcription factor SPEECHLESS-like (A)	ko04016: MAPK signaling pathway - plant	PREDICTED: transcription factor bHLH67 isoform X1 [Vitis vinifera]	FAMA_ARATH RecName: Full=Transcription factor FAMA; AltName: Full=Basic helix-loop-helix protein 97; Short=AtbHLH97; Short=bHLH 97; AltName: Full=Transcription factor EN 14; AltName: Full=bHLH transcription factor bHLH097;	A0A3S3N9A7_9MAGN SubName: Full=Transcription factor bHLH67 isoform X1 {ECO:0000313|EMBL:RWR87712.1};	At3g61950	GO:0005634,nucleus; GO:0003677,DNA binding; GO:0003700,DNA-binding transcription factor activity; GO:0046983,protein dimerization activity; GO:0010052,guard cell differentiation; GO:0010377,guard cell fate commitment; GO:0010444,guard mother cell differentiation; GO:0051782,negative regulation of cell division; GO:0061086,negative regulation of histone H3-K27 methylation; GO:0045597,positive regu…
evm.TU.scaffold_162.11/CpbHLH93	7.69	7.03	7.15	10.47	8.52	9.34	8.3	11.1	8.56	8.2	8.77	6.67	9.89	9.72	10.05	10.08	10.29	10.74	231	227	200	348	272	314	348	367	267	261	287	214	329	328	346	346	318	328	Chr7	9186692	9191600	-	EVM-prediction-scaffold_162.11	--	K22484 transcriptional regulator CBF1 | (RefSeq) transcription factor bHLH106 (A)	--	Myc-type [Macleaya cordata]	BH030_ARATH RecName: Full=Transcription factor bHLH30; AltName: Full=Basic helix-loop-helix protein 30; Short=AtbHLH30; Short=bHLH 30; AltName: Full=Transcription factor EN 53; AltName: Full=bHLH transcription factor bHLH030;	A0A443P6Y8_9MAGN SubName: Full=Transcription factor bHLH30-like protein {ECO:0000313|EMBL:RWR86486.1};	At1g68810	GO:0005634,nucleus; GO:0003677,DNA binding; GO:0003700,DNA-binding transcription factor activity; GO:0046983,protein dimerization activity; GO:0006355,regulation of transcription, DNA-templated; GO:0003674,molecular_function; GO:0003676,nucleic acid binding; GO:0005488,binding; GO:0097159,organic cyclic compound binding; GO:1901363,heterocyclic compound binding; GO:0140110,transcription regulator…
evm.TU.scaffold_421.98/CpbHLH94	6.77	8.91	9.4	3.4	2.89	3.66	6.03	3.66	4.08	8	7.91	6.08	2.1	2.5	2.03	6.94	8.71	5.99	99	140	128	55	45	60	123	59	62	124	126	95	34	41	34	116	131	89	Chr7	11587120	11594891	-	EVM-prediction-scaffold_421.98	--	--	--	transcription factor bHLH147-like [Dendrobium catenatum]	BH148_ARATH RecName: Full=Transcription factor bHLH148 {ECO:0000303|PubMed:24009530}; AltName: Full=ATBS1 interacting factor 2 {ECO:0000303|PubMed:20023194}; AltName: Full=Basic helix-loop-helix protein 148 {ECO:0000303|PubMed:24009530}; Short=AtbHLH148 {ECO:0000303|PubMed:24009530}; Short=bHLH 148 {ECO:0000303|PubMed:24009530}; AltName: Full=Protein RSA1 INTERACTING TRANSCRIPTION FACTOR 1 {ECO:0…	A0A3S3MSS1_9MAGN SubName: Full=Transcription factor bHLH147-like protein {ECO:0000313|EMBL:RWR89082.1};	At3g06590	GO:0005634,nucleus; GO:0003700,DNA-binding transcription factor activity; GO:0046983,protein dimerization activity; GO:0043565,sequence-specific DNA binding; GO:0000976,transcription regulatory region sequence-specific DNA binding; GO:0006355,regulation of transcription, DNA-templated; GO:0042542,response to hydrogen peroxide; GO:0006979,response to oxidative stress; GO:0009651,response to salt s…
evm.TU.scaffold_797.37/CpbHLH95	0.81	0.5	0.49	0.51	0.48	0.51	0.85	0.78	0.91	0.66	0.77	0.56	0.58	0.36	0.28	1.74	1.81	1.72	30	20	17	21	19	21	44	32	35	26	31	22	24	15	12	74	69	65	Chr7	19254960	19258507	+	EVM-prediction-scaffold_797.37	--	K05765 cofilin | (RefSeq) uncharacterized LOC105781290 (A)	--	PREDICTED: transcription factor bHLH123-like [Nelumbo nucifera]	BH123_ARATH RecName: Full=Transcription factor bHLH123; AltName: Full=Basic helix-loop-helix protein 123; Short=AtbHLH123; Short=bHLH 123; AltName: Full=Transcription factor EN 63; AltName: Full=bHLH transcription factor bHLH123;	A0A443PBR1_9MAGN SubName: Full=Transcription factor bHLH123-like protein {ECO:0000313|EMBL:RWR88190.1};	At3g20640	GO:0005634,nucleus; GO:0003700,DNA-binding transcription factor activity; GO:0000981,DNA-binding transcription factor activity, RNA polymerase II-specific; GO:0046983,protein dimerization activity; GO:0000978,RNA polymerase II cis-regulatory region sequence-specific DNA binding; GO:0006357,regulation of transcription by RNA polymerase II; GO:0003674,molecular_function; GO:0140110,transcription re…
evm.TU.scaffold_149.203/CpbHLH96	8.6	7.67	7.29	2.07	2.32	2.27	4.16	5.32	3.8	4.79	5.82	5.04	2.02	1.48	2.06	1.34	1.59	1.24	342	328	270	91	98	101	231	233	157	202	252	214	89	66	94	61	65	50	Chr7	23905849	23911703	-	EVM-prediction-scaffold_149.203	--	K13422 transcription factor MYC2 | (RefSeq) transcription factor MYC4-like isoform X1 (A)	ko04016: MAPK signaling pathway - plant; ko04075: Plant hormone signal transduction	PREDICTED: basic helix-loop-helix protein A-like [Nelumbo nucifera]	BHL42_ACTCC RecName: Full=Transcription factor BHLH42 {ECO:0000305}; AltName: Full=Basic helix-loop-helix protein 42 {ECO:0000305}; Short=AcBHLH42 {ECO:0000303|PubMed:30912865};	A0A443PX70_9MAGN SubName: Full=Basic helix-loop-helix protein A-like protein {ECO:0000313|EMBL:RWR95376.1};	At4g09820	GO:0005634,nucleus; GO:0003677,DNA binding; GO:0046983,protein dimerization activity; GO:0031542,positive regulation of anthocyanin biosynthetic process; GO:0045893,positive regulation of transcription, DNA-templated; GO:0003674,molecular_function; GO:0003676,nucleic acid binding; GO:0005488,binding; GO:0097159,organic cyclic compound binding; GO:1901363,heterocyclic compound binding; GO:0005515,…
evm.TU.scaffold_149.239/CpbHLH97	2.93	1.19	0.59	0.17	0.17	0.33	1.18	1.42	0.53	0.78	0.93	0.26	0	0.24	0.08	0.08	0	0.63	32	14	6	2	2	4	18	17	6	9	11	3	0	3	1	1	0	7	Chr7	24824745	24828064	+	EVM-prediction-scaffold_149.239	--	--	--	hypothetical protein AQUCO_00900234v1 [Aquilegia coerulea]	--	A0A7J6XEG9_THATH SubName: Full=Bhlh transcription factor {ECO:0000313|EMBL:KAF5208201.1};	--	--
evm.TU.scaffold_577.3/CpbHLH98	8.32	11.57	12.66	2.17	1.76	0.98	5.67	5.71	5.3	2.98	3.24	3.31	2.77	2.59	2.92	0.71	1.09	1.57	266	398	377	77	60	35	253	201	176	101	113	113	98	93	107	26	36	51	Chr7	50734160	50743373	-	EVM-prediction-scaffold_577.3	--	K12126 phytochrome-interacting factor 3 | (RefSeq) PIF3; hypothetical protein (A)	ko04075: Plant hormone signal transduction; ko04712: Circadian rhythm - plant	PREDICTED: transcription factor UNE12-like isoform X1 [Nelumbo nucifera]	UNE12_ARATH RecName: Full=Transcription factor UNE12; AltName: Full=Basic helix-loop-helix protein 59; Short=AtbHLH59; Short=bHLH 59; AltName: Full=Protein UNFERTILIZED EMBRYO SAC 12; AltName: Full=Transcription factor EN 93; AltName: Full=bHLH transcription factor bHLH059;	A0A3S3QSB2_9MAGN SubName: Full=Transcription factor UNE12-like protein isoform X1 {ECO:0000313|EMBL:RWR88858.1};	At4g02590	GO:0005634,nucleus; GO:0003700,DNA-binding transcription factor activity; GO:0000981,DNA-binding transcription factor activity, RNA polymerase II-specific; GO:0046983,protein dimerization activity; GO:0000978,RNA polymerase II cis-regulatory region sequence-specific DNA binding; GO:0009567,double fertilization forming a zygote and endosperm; GO:0007275,multicellular organism development; GO:00313…
evm.TU.scaffold_155.80/CpbHLH99	8.62	9.75	9.07	2.36	2.48	2.2	6.42	4.19	7.43	26.01	22.98	26.76	24.65	25.56	27.09	15.41	17.68	15.08	284	345	278	86	87	81	295	152	254	908	824	941	899	946	1022	580	599	505	Chr7	52376778	52386041	-	EVM-prediction-scaffold_155.80	--	K12126 phytochrome-interacting factor 3 | (RefSeq) PIF3; hypothetical protein (A)	ko04075: Plant hormone signal transduction; ko04712: Circadian rhythm - plant	PREDICTED: transcription factor UNE12-like isoform X1 [Nelumbo nucifera]	UNE12_ARATH RecName: Full=Transcription factor UNE12; AltName: Full=Basic helix-loop-helix protein 59; Short=AtbHLH59; Short=bHLH 59; AltName: Full=Protein UNFERTILIZED EMBRYO SAC 12; AltName: Full=Transcription factor EN 93; AltName: Full=bHLH transcription factor bHLH059;	A0A3S3QSB2_9MAGN SubName: Full=Transcription factor UNE12-like protein isoform X1 {ECO:0000313|EMBL:RWR88858.1};	At4g02590	GO:0005634,nucleus; GO:0003700,DNA-binding transcription factor activity; GO:0000981,DNA-binding transcription factor activity, RNA polymerase II-specific; GO:0046983,protein dimerization activity; GO:0000978,RNA polymerase II cis-regulatory region sequence-specific DNA binding; GO:0009567,double fertilization forming a zygote and endosperm; GO:0007275,multicellular organism development; GO:00313…
evm.TU.scaffold_26.342/CpbHLH101	10.93	7.56	9.64	2.94	2.75	3.54	3.45	4.9	3.38	6.13	6.27	8.04	5.28	5.32	5.9	1.71	2.59	2.11	168	125	138	50	45	61	74	83	54	100	105	132	90	92	104	30	41	33	Chr8	16708659	16711985	-	EVM-prediction-scaffold_26.342	--	K16189 phytochrome-interacting factor 4 | (RefSeq) transcription factor PIF4-like isoform X3 (A)	ko04075: Plant hormone signal transduction	hypothetical protein CICLE_v10031028mg [Citrus clementina]	PIL13_ORYSJ RecName: Full=Transcription factor PHYTOCHROME INTERACTING FACTOR-LIKE 13 {ECO:0000303|PubMed:17485859}; Short=OsPIL13 {ECO:0000303|PubMed:17485859}; Short=PIF-like protein 13 {ECO:0000305}; AltName: Full=Basic helix-loop-helix protein 152 {ECO:0000303|PubMed:16896230}; Short=OsbHLH152 {ECO:0000303|PubMed:16896230}; AltName: Full=OsPIL1 {ECO:0000303|PubMed:22984180};	A0A3S3QKB3_9MAGN SubName: Full=Transcription factor PIF4-like protein isoform X1 {ECO:0000313|EMBL:RWR85794.1};	At2g20180	GO:0005634,nucleus; GO:0003677,DNA binding; GO:0046983,protein dimerization activity; GO:0080006,internode patterning; GO:0090229,negative regulation of red or far-red light signaling pathway; GO:0045893,positive regulation of transcription, DNA-templated; GO:0006355,regulation of transcription, DNA-templated; GO:0003674,molecular_function; GO:0003676,nucleic acid binding; GO:0005488,binding; GO:…
evm.TU.scaffold_26.162/CpbHLH103	10.36	9.71	11.13	2.75	2.38	1.81	3.89	4.61	4.32	6.01	5.79	5.84	1.37	2.26	1.96	15.47	12.89	18.03	143	144	143	42	35	28	75	70	62	88	87	86	21	35	31	244	183	253	Chr8	19011542	19013100	-	EVM-prediction-scaffold_26.162	--	--	--	PREDICTED: uncharacterized protein LOC103705848 [Phoenix dactylifera]	BH162_ARATH RecName: Full=Transcription factor bHLH162; AltName: Full=Basic helix-loop-helix protein 162; Short=AtbHLH162 {ECO:0000303|PubMed:14600211}; Short=bHLH 162; AltName: Full=bHLH transcription factor bHLH162;	A0A3S3QIJ0_9MAGN SubName: Full=Transcription factor bHLH162-like protein isoform X2 {ECO:0000313|EMBL:RWR85594.1};	At4g20970	GO:0090575,RNA polymerase II transcription regulator complex; GO:0003700,DNA-binding transcription factor activity; GO:0000981,DNA-binding transcription factor activity, RNA polymerase II-specific; GO:0046983,protein dimerization activity; GO:0000977,RNA polymerase II transcription regulatory region sequence-specific DNA binding; GO:0050832,defense response to fungus; GO:0006357,regulation of tra…
evm.TU.scaffold_90.277/CpbHLH105	0.37	1.12	0.73	0.42	0	0	0.79	1.8	0.85	1.63	1.39	1.27	0.24	0	0.36	5.85	8.99	7.24	7	23	13	9	0	0	21	38	17	33	29	26	5	0	8	128	177	141	Chr8	29217414	29221612	-	EVM-prediction-scaffold_90.277	--	K18878 BHLH transcription factor Upa20 | (RefSeq) Upa20; transcription factor bHLH137-like (A)	ko04626: Plant-pathogen interaction	PREDICTED: transcription factor bHLH137 [Vitis vinifera]	BH137_ARATH RecName: Full=Transcription factor bHLH137; AltName: Full=Basic helix-loop-helix protein 137; Short=AtbHLH137; Short=bHLH 137; AltName: Full=Transcription factor EN 89; AltName: Full=bHLH transcription factor bHLH137;	A0A5B6ZWT0_DAVIN RecName: Full=BHLH domain-containing protein {ECO:0000259|PROSITE:PS50888}; Flags: Fragment;	At1g26260	GO:0005634,nucleus; GO:0003677,DNA binding; GO:0003700,DNA-binding transcription factor activity; GO:0046983,protein dimerization activity; GO:0009739,response to gibberellin; GO:0003674,molecular_function; GO:0003676,nucleic acid binding; GO:0005488,binding; GO:0097159,organic cyclic compound binding; GO:1901363,heterocyclic compound binding; GO:0140110,transcription regulator activity; GO:00055…
evm.TU.scaffold_90.135/CpbHLH106	8.16	10.37	10.55	4.94	4.55	3.56	7.04	9.99	8.2	8.25	10.12	9.03	8.13	9.06	6.94	3.42	3.8	4.45	319	436	384	214	189	156	384	430	333	342	431	377	352	398	311	153	153	177	Chr8	31691446	31695127	+	EVM-prediction-scaffold_90.135	--	K18878 BHLH transcription factor Upa20 | (RefSeq) Upa20; transcription factor bHLH137-like (A)	ko04626: Plant-pathogen interaction	Myc-type [Macleaya cordata]	BH062_ARATH RecName: Full=Transcription factor bHLH62; AltName: Full=Basic helix-loop-helix protein 62; Short=AtbHLH62; Short=bHLH 62; AltName: Full=Transcription factor EN 85; AltName: Full=bHLH transcription factor bHLH062;	A0A443N7Z7_9MAGN SubName: Full=Transcription factor bHLH62-like protein {ECO:0000313|EMBL:RWR74639.1};	At3g07340	GO:0005634,nucleus; GO:0003700,DNA-binding transcription factor activity; GO:0046983,protein dimerization activity; GO:0000976,transcription regulatory region sequence-specific DNA binding; GO:0006355,regulation of transcription, DNA-templated; GO:0003674,molecular_function; GO:0140110,transcription regulator activity; GO:0005488,binding; GO:0005515,protein binding; GO:0001067,regulatory region n…
evm.TU.scaffold_8.109/CpbHLH109	3.54	7.66	6.11	0	0.21	0	0.06	0.24	0	1.94	2.63	3.1	0	0.64	0.51	0	0.17	0	79	184	127	0	5	0	2	6	0	46	64	74	0	16	13	0	4	0	Chr8	38903897	38905886	-	EVM-prediction-scaffold_8.109	--	K13422 transcription factor MYC2 | (RefSeq) transcription factor MYC2 (A)	ko04016: MAPK signaling pathway - plant; ko04075: Plant hormone signal transduction	hypothetical protein AQUCO_01000012v1 [Aquilegia coerulea]	BH025_ARATH RecName: Full=Transcription factor bHLH25; AltName: Full=Basic helix-loop-helix protein 25; Short=AtbHLH25; Short=bHLH 25; AltName: Full=Transcription factor EN 29; AltName: Full=bHLH transcription factor bHLH025;	A0A443N676_9MAGN SubName: Full=Transcription factor bHLH18-like protein {ECO:0000313|EMBL:RWR74042.1};	At4g37850	GO:0005634,nucleus; GO:0003700,DNA-binding transcription factor activity; GO:0046983,protein dimerization activity; GO:0000976,transcription regulatory region sequence-specific DNA binding; GO:0006355,regulation of transcription, DNA-templated; GO:0003674,molecular_function; GO:0140110,transcription regulator activity; GO:0005488,binding; GO:0005515,protein binding; GO:0001067,regulatory region n…
evm.TU.scaffold_108.51/CpbHLH110	28.41	27.52	30.91	0	0	0.07	0	0	0	10.02	12.44	14.02	0.33	0.47	0.43	0	0.24	0.04	698	727	707	0	0	2	0	0	0	261	333	368	9	13	12	0	6	1	Chr9	685841	688355	+	EVM-prediction-scaffold_108.51	--	K13422 transcription factor MYC2 | (RefSeq) transcription factor MYC2 (A)	ko04016: MAPK signaling pathway - plant; ko04075: Plant hormone signal transduction	PREDICTED: transcription factor EAT1-like [Nelumbo nucifera]	EAT1_ORYSJ RecName: Full=Transcription factor EAT1 {ECO:0000305}; AltName: Full=Basic helix-loop-helix protein 141 {ECO:0000305}; Short=OsbHLH141 {ECO:0000303|PubMed:16896230}; AltName: Full=Protein DELAYED TAPETUM DEGENERATION {ECO:0000303|PubMed:23519457}; AltName: Full=Protein ETERNAL TAPETUM 1 {ECO:0000303|PubMed:23385589};	A0A3S3MPA2_9MAGN SubName: Full=Transcription factor EAT1-like protein {ECO:0000313|EMBL:RWR87271.1};	At2g31220	GO:0005634,nucleus; GO:0046983,protein dimerization activity; GO:0048658,anther wall tapetum development; GO:0009555,pollen development; GO:0043068,positive regulation of programmed cell death; GO:0006355,regulation of transcription, DNA-templated; GO:0003674,molecular_function; GO:0005488,binding; GO:0005515,protein binding; GO:0000003,reproduction; GO:0003006,developmental process involved in r…
evm.TU.scaffold_128.104/CpbHLH111	0.52	0.63	0.17	0	0	0	0	0	0.05	2.16	1.48	1.76	0.14	0.09	0.27	0	0.25	0	10	13	3	0	0	0	0	0	1	44	31	36	3	2	6	0	5	0	Chr9	4143090	4144811	-	EVM-prediction-scaffold_128.104	--	K20558 transcription factor SPEECHLESS | (RefSeq) transcription factor SPEECHLESS (A)	ko04016: MAPK signaling pathway - plant	PREDICTED: transcription factor SPEECHLESS [Elaeis guineensis]	SPCH_ARATH RecName: Full=Transcription factor SPEECHLESS {ECO:0000303|PubMed:17183265}; AltName: Full=Basic helix-loop-helix protein 98 {ECO:0000303|PubMed:12679534, ECO:0000303|PubMed:14600211}; Short=AtbHLH98 {ECO:0000303|PubMed:12679534, ECO:0000303|PubMed:14600211}; Short=bHLH 98 {ECO:0000303|PubMed:12679534, ECO:0000303|PubMed:14600211}; AltName: Full=Transcription factor EN 19 {ECO:0000303|…	A0A443PQX5_9MAGN SubName: Full=Transcription factor SPEECHLESS {ECO:0000313|EMBL:RWR93184.1};	At5g53210	GO:0005634,nucleus; GO:0003677,DNA binding; GO:0001216,DNA-binding transcription activator activity; GO:0003700,DNA-binding transcription factor activity; GO:0046983,protein dimerization activity; GO:0010052,guard cell differentiation; GO:0045893,positive regulation of transcription, DNA-templated; GO:0047484,regulation of response to osmotic stress; GO:2000038,regulation of stomatal complex deve…
evm.TU.scaffold_59.62/CpbHLH112	4.96	4.4	5.03	7.01	8.3	7.01	4.42	6.03	5.56	4.12	3.86	3.3	2.94	3.06	3.91	16.83	21.69	21.5	218	208	206	341	388	345	271	292	254	192	185	155	143	151	197	846	981	961	Chr9	9107385	9112535	+	EVM-prediction-scaffold_59.62	--	K16189 phytochrome-interacting factor 4 | (RefSeq) transcription factor PIF4-like isoform X1 (A)	ko04075: Plant hormone signal transduction	PREDICTED: transcription factor PIF4-like isoform X2 [Elaeis guineensis]	PIL13_ORYSJ RecName: Full=Transcription factor PHYTOCHROME INTERACTING FACTOR-LIKE 13 {ECO:0000303|PubMed:17485859}; Short=OsPIL13 {ECO:0000303|PubMed:17485859}; Short=PIF-like protein 13 {ECO:0000305}; AltName: Full=Basic helix-loop-helix protein 152 {ECO:0000303|PubMed:16896230}; Short=OsbHLH152 {ECO:0000303|PubMed:16896230}; AltName: Full=OsPIL1 {ECO:0000303|PubMed:22984180};	A0A3S3QS11_9MAGN SubName: Full=Transcription factor PIF4-like protein isoform X2 {ECO:0000313|EMBL:RWR88702.1};	At2g43010	GO:0005634,nucleus; GO:0003677,DNA binding; GO:0046983,protein dimerization activity; GO:0080006,internode patterning; GO:0090229,negative regulation of red or far-red light signaling pathway; GO:0045893,positive regulation of transcription, DNA-templated; GO:0006355,regulation of transcription, DNA-templated; GO:0003674,molecular_function; GO:0003676,nucleic acid binding; GO:0005488,binding; GO:…
evm.TU.scaffold_86.256/CpbHLH113	1.56	1.59	1.27	0.39	0.26	0.67	3.19	1.64	3.15	1.65	0.94	1.05	0.23	0.03	0.27	0.57	0.73	0.67	50	55	38	14	9	24	143	58	105	56	33	36	8	1	10	21	24	22	Chr9	11255456	11259746	-	EVM-prediction-scaffold_86.256	--	K12126 phytochrome-interacting factor 3 | (RefSeq) transcription factor PIF3 (A)	ko04075: Plant hormone signal transduction; ko04712: Circadian rhythm - plant	Basic helix-loop-helix DNA-binding superfamily protein isoform 1 [Theobroma cacao]	UNE10_ARATH RecName: Full=Transcription factor UNE10; AltName: Full=Basic helix-loop-helix protein 16; Short=AtbHLH16; Short=bHLH 16; AltName: Full=Protein UNFERTILIZED EMBRYO SAC 10; AltName: Full=Transcription factor EN 108; AltName: Full=bHLH transcription factor bHLH016;	A0A443P9N3_9MAGN SubName: Full=Basic helix-loop-helix DNA-binding superfamily protein isoform 1 {ECO:0000313|EMBL:RWR87462.1};	At4g00050	GO:0005634,nucleus; GO:0009506,plasmodesma; GO:0003677,DNA binding; GO:0003700,DNA-binding transcription factor activity; GO:0046983,protein dimerization activity; GO:0009704,de-etiolation; GO:0009567,double fertilization forming a zygote and endosperm; GO:0009959,negative gravitropism; GO:0010187,negative regulation of seed germination; GO:0006355,regulation of transcription, DNA-templated; GO:0…
evm.TU.scaffold_86.142/CpbHLH114	12.5	13.15	10.61	0	0	0	0.29	0.64	0.31	5.88	7.38	4.91	0.03	0.05	0.03	0	0	0	429	485	339	0	0	0	14	24	11	214	276	180	1	2	1	0	0	0	Chr9	12733201	12737706	+	EVM-prediction-scaffold_86.142	--	K20558 transcription factor SPEECHLESS | (RefSeq) transcription factor SPEECHLESS-like (A)	ko04016: MAPK signaling pathway - plant	PREDICTED: transcription factor bHLH67 isoform X1 [Vitis vinifera]	BH067_ARATH RecName: Full=Transcription factor bHLH67; AltName: Full=Basic helix-loop-helix protein 67; Short=AtbHLH67; Short=bHLH 67; AltName: Full=Transcription factor EN 11; AltName: Full=bHLH transcription factor bHLH067;	A0A3S3N9A7_9MAGN SubName: Full=Transcription factor bHLH67 isoform X1 {ECO:0000313|EMBL:RWR87712.1};	At1g22490	GO:0005634,nucleus; GO:0003700,DNA-binding transcription factor activity; GO:0000981,DNA-binding transcription factor activity, RNA polymerase II-specific; GO:0042803,protein homodimerization activity; GO:0000978,RNA polymerase II cis-regulatory region sequence-specific DNA binding; GO:0009631,cold acclimation; GO:0006357,regulation of transcription by RNA polymerase II; GO:0006355,regulation of …
evm.TU.scaffold_86.2/CpbHLH115	18.93	14.78	19.83	6.04	5.3	4.8	15.65	16.33	21.53	27.4	25.4	27.87	12.36	11.22	12.68	16.58	15.34	15.27	722	606	704	255	215	205	833	686	853	1108	1055	1135	522	481	554	723	602	592	Chr9	14665361	14671457	-	EVM-prediction-scaffold_86.2	--	K13422 transcription factor MYC2 | (RefSeq) transcription factor MYC2 (A)	ko04016: MAPK signaling pathway - plant; ko04075: Plant hormone signal transduction	transcription factor MYC [Lindera glauca]	MYC2_SOLLC RecName: Full=Transcription factor MYC2 {ECO:0000303|PubMed:24483714}; Short=LeMYC2 {ECO:0000303|PubMed:24483714}; Short=SlMYC2 {ECO:0000303|PubMed:29528226}; AltName: Full=Basic helix-loop-helix protein 147 {ECO:0000303|PubMed:25612924}; AltName: Full=Transcription factor bHLH147 {ECO:0000303|PubMed:25612924}; AltName: Full=bHLH transcription factor bHLH147 {ECO:0000305};	A0A443P995_9MAGN SubName: Full=Transcription factor MYC {ECO:0000313|EMBL:RWR87327.1};	At1g32640	GO:0005634,nucleus; GO:0003700,DNA-binding transcription factor activity; GO:0046983,protein dimerization activity; GO:0043565,sequence-specific DNA binding; GO:0000976,transcription regulatory region sequence-specific DNA binding; GO:0006952,defense response; GO:0007275,multicellular organism development; GO:0045893,positive regulation of transcription, DNA-templated; GO:0040008,regulation of gr…
evm.TU.scaffold_174.7/CpbHLH116	28.83	33.6	27.34	1.09	2.67	1.4	12.36	18.62	14.86	8.31	10.85	6.83	2.45	2.84	3.63	0.74	1.06	1.72	478	599	422	20	47	26	286	340	256	146	196	121	45	53	69	14	18	29	Chr9	14921397	14924193	-	EVM-prediction-scaffold_174.7	--	K20558 transcription factor SPEECHLESS | (RefSeq) transcription factor SPEECHLESS (A)	ko04016: MAPK signaling pathway - plant	hypothetical protein AQUCO_00500478v1 [Aquilegia coerulea]	BH094_ARATH RecName: Full=Transcription factor bHLH94; AltName: Full=Basic helix-loop-helix protein 94; Short=AtbHLH94; Short=bHLH 94; AltName: Full=Transcription factor EN 16; AltName: Full=bHLH transcription factor bHLH094;	A0A3S3NJP1_9MAGN SubName: Full=Transcription factor bHLH94-like protein {ECO:0000313|EMBL:RWR81016.1};	At1g22490	GO:0005634,nucleus; GO:0003700,DNA-binding transcription factor activity; GO:0000981,DNA-binding transcription factor activity, RNA polymerase II-specific; GO:0046983,protein dimerization activity; GO:0000978,RNA polymerase II cis-regulatory region sequence-specific DNA binding; GO:0006357,regulation of transcription by RNA polymerase II; GO:0006355,regulation of transcription, DNA-templated; GO:…
evm.TU.scaffold_174.48/CpbHLH117	0.3	0.28	0	0	0.14	0	0.98	1.61	2.58	4.2	2.46	4.26	0.59	0.68	0.84	0.84	1.28	1.44	6	6	0	0	3	0	27	35	53	88	53	90	13	15	19	19	26	29	Chr9	15453541	15455561	-	EVM-prediction-scaffold_174.48	--	--	--	PREDICTED: transcription factor bHLH126-like [Gossypium hirsutum]	BH120_ARATH RecName: Full=Transcription factor bHLH120; AltName: Full=Basic helix-loop-helix protein 120; Short=AtbHLH120; Short=bHLH 120; AltName: Full=Transcription factor EN 4; AltName: Full=bHLH transcription factor bHLH120;	A0A443PAS3_9MAGN SubName: Full=Transcription factor bHLH118-like protein {ECO:0000313|EMBL:RWR87878.1};	At4g25410	GO:0090575,RNA polymerase II transcription regulator complex; GO:0003700,DNA-binding transcription factor activity; GO:0000981,DNA-binding transcription factor activity, RNA polymerase II-specific; GO:0046983,protein dimerization activity; GO:0000977,RNA polymerase II transcription regulatory region sequence-specific DNA binding; GO:0006357,regulation of transcription by RNA polymerase II; GO:000…
evm.TU.scaffold_103.58/CpbHLH118	26.71	22.72	25.72	4.96	4.94	4.16	12.43	18.29	16.47	16.36	16.75	15.76	8.02	8.52	8.96	5.92	6.05	6.59	773	707	693	159	152	135	502	583	495	502	528	487	257	277	297	196	180	194	Chr9	29958938	29977164	-	EVM-prediction-scaffold_103.58	--	K13422 transcription factor MYC2 | (RefSeq) transcription factor MYC4-like (A)	ko04016: MAPK signaling pathway - plant; ko04075: Plant hormone signal transduction	PREDICTED: transcription factor GLABRA 3-like [Nelumbo nucifera]	GL3_ARATH RecName: Full=Transcription factor GLABRA 3; AltName: Full=Basic helix-loop-helix protein 1; Short=AtMYC6; Short=AtbHLH1; Short=bHLH 1; AltName: Full=Protein SHAPESHIFTER; AltName: Full=Transcription factor EN 31; AltName: Full=bHLH transcription factor bHLH001;	A0A6M9EJ99_9MAGN SubName: Full=BHLH1 {ECO:0000313|EMBL:QKL20124.1};	At1g63650	GO:0005634,nucleus; GO:0003677,DNA binding; GO:0003700,DNA-binding transcription factor activity; GO:0046983,protein dimerization activity; GO:0001708,cell fate specification; GO:0009957,epidermal cell fate specification; GO:0009867,jasmonic acid mediated signaling pathway; GO:0007275,multicellular organism development; GO:0031542,positive regulation of anthocyanin biosynthetic process; GO:001009…
evm.TU.scaffold_13.23/CpbHLH119	0	0.26	0	0	0	0	0	0	0	1.12	1.53	1.5	0	0	0	0	0	0	0	4	0	0	0	0	0	0	0	17	24	23	0	0	0	0	0	0	Chr10	10615294	10616608	-	EVM-prediction-scaffold_13.23	--	--	--	PREDICTED: transcription factor bHLH53-like [Nelumbo nucifera]	BH053_ARATH RecName: Full=Transcription factor bHLH53; AltName: Full=Basic helix-loop-helix protein 53; Short=AtbHLH53; Short=bHLH 53; AltName: Full=Transcription factor EN 123; AltName: Full=bHLH transcription factor bHLH053;	A0A3S3N5I3_9MAGN SubName: Full=Transcription factor bHLH52 {ECO:0000313|EMBL:RWR85768.1};	At2g34820	GO:0005634,nucleus; GO:0003700,DNA-binding transcription factor activity; GO:0000981,DNA-binding transcription factor activity, RNA polymerase II-specific; GO:0046983,protein dimerization activity; GO:0000978,RNA polymerase II cis-regulatory region sequence-specific DNA binding; GO:0000976,transcription regulatory region sequence-specific DNA binding; GO:0006357,regulation of transcription by RNA…
evm.TU.scaffold_13.38/CpbHLH120	7.22	6.84	9.2	0.55	0.51	0.24	1.35	2.21	2.6	5.22	4.71	4.86	0.18	0	0.12	0.35	0.26	0	107	109	127	9	8	4	28	36	40	82	76	77	3	0	2	6	4	0	Chr10	10882533	10884361	-	EVM-prediction-scaffold_13.38	--	K16189 phytochrome-interacting factor 4 | (RefSeq) transcription factor PIF4-like isoform X1 (A)	ko04075: Plant hormone signal transduction	PREDICTED: transcription factor PIF4-like isoform X1 [Elaeis guineensis]	PIL13_ORYSJ RecName: Full=Transcription factor PHYTOCHROME INTERACTING FACTOR-LIKE 13 {ECO:0000303|PubMed:17485859}; Short=OsPIL13 {ECO:0000303|PubMed:17485859}; Short=PIF-like protein 13 {ECO:0000305}; AltName: Full=Basic helix-loop-helix protein 152 {ECO:0000303|PubMed:16896230}; Short=OsbHLH152 {ECO:0000303|PubMed:16896230}; AltName: Full=OsPIL1 {ECO:0000303|PubMed:22984180};	A0A3S3QKB3_9MAGN SubName: Full=Transcription factor PIF4-like protein isoform X1 {ECO:0000313|EMBL:RWR85794.1};	At2g20180	GO:0005634,nucleus; GO:0003677,DNA binding; GO:0046983,protein dimerization activity; GO:0080006,internode patterning; GO:0090229,negative regulation of red or far-red light signaling pathway; GO:0045893,positive regulation of transcription, DNA-templated; GO:0006355,regulation of transcription, DNA-templated; GO:0003674,molecular_function; GO:0003676,nucleic acid binding; GO:0005488,binding; GO:…
evm.TU.scaffold_136.3/CpbHLH121	19.73	22.81	22.21	14.94	16.7	13.07	14.11	20.88	14.58	21.94	25.2	21.02	15.55	12.78	16.54	16.88	19.08	18.07	581	722	609	487	523	431	580	677	446	685	808	661	507	423	558	568	578	541	Chr10	23494844	23528470	-	EVM-prediction-scaffold_136.3	--	--	--	PREDICTED: transcription factor bHLH121 [Nelumbo nucifera]	BH121_ARATH RecName: Full=Transcription factor bHLH121; AltName: Full=Basic helix-loop-helix protein 121; Short=AtbHLH121; Short=bHLH 121; AltName: Full=Transcription factor EN 138; AltName: Full=bHLH transcription factor bHLH121;	A0A443PNI5_9MAGN SubName: Full=Transcription factor bHLH121 {ECO:0000313|EMBL:RWR92292.1};	At3g19860	GO:0005634,nucleus; GO:0003700,DNA-binding transcription factor activity; GO:0046983,protein dimerization activity; GO:1990837,sequence-specific double-stranded DNA binding; GO:0000976,transcription regulatory region sequence-specific DNA binding; GO:0006879,cellular iron ion homeostasis; GO:0003674,molecular_function; GO:0140110,transcription regulator activity; GO:0005488,binding; GO:0005515,pr…
evm.TU.scaffold_167.32/CpbHLH122	10.97	10.1	8.62	16.1	14.96	13.93	9.02	12.63	9.22	8.75	9.24	7.48	8.71	9.42	9.97	12.04	13.56	13.98	291	288	213	473	422	414	334	369	254	246	267	212	256	281	303	365	370	377	Chr10	30786259	30800074	+	EVM-prediction-scaffold_167.32	--	--	--	Myc-type [Macleaya cordata]	BH062_ORYSJ RecName: Full=Transcription factor BHLH062 {ECO:0000305}; AltName: Full=Basic helix-loop-helix protein 1 {ECO:0000303|PubMed:12920519}; Short=OsbHLH1 {ECO:0000303|PubMed:12920519}; AltName: Full=Basic helix-loop-helix protein 62 {ECO:0000303|PubMed:16896230}; Short=OsbHLH062 {ECO:0000303|PubMed:16896230}; AltName: Full=bHLH transcription factor bHLH062 {ECO:0000305};	A0A443NIR3_9MAGN SubName: Full=Transcription factor bHLH47-like protein {ECO:0000313|EMBL:RWR78399.1};	At3g47640	GO:0005634,nucleus; GO:0003677,DNA binding; GO:0046983,protein dimerization activity; GO:0006355,regulation of transcription, DNA-templated; GO:0003674,molecular_function; GO:0003676,nucleic acid binding; GO:0005488,binding; GO:0097159,organic cyclic compound binding; GO:1901363,heterocyclic compound binding; GO:0005515,protein binding; GO:0006139,nucleobase-containing compound metabolic process;…
evm.TU.scaffold_727.16/CpbHLH123	4.8	4.4	3.48	2.14	1.91	1.36	3	1.96	2.31	1.18	1.67	0.95	0.95	1.44	0.97	0.89	1.41	1.26	142	140	96	70	60	45	124	64	71	37	54	30	31	48	33	30	43	38	Chr10	33218369	33221085	+	EVM-prediction-scaffold_727.16	--	K20558 transcription factor SPEECHLESS | (RefSeq) transcription factor SPEECHLESS (A)	ko04016: MAPK signaling pathway - plant	PREDICTED: transcription factor bHLH96 [Nelumbo nucifera]	BH094_ARATH RecName: Full=Transcription factor bHLH94; AltName: Full=Basic helix-loop-helix protein 94; Short=AtbHLH94; Short=bHLH 94; AltName: Full=Transcription factor EN 16; AltName: Full=bHLH transcription factor bHLH094;	A0A3S3N522_9MAGN SubName: Full=Transcription factor bHLH96 {ECO:0000313|EMBL:RWR92470.1};	At1g22490	GO:0005634,nucleus; GO:0003700,DNA-binding transcription factor activity; GO:0000981,DNA-binding transcription factor activity, RNA polymerase II-specific; GO:0046983,protein dimerization activity; GO:0000978,RNA polymerase II cis-regulatory region sequence-specific DNA binding; GO:0006357,regulation of transcription by RNA polymerase II; GO:0006355,regulation of transcription, DNA-templated; GO:…
evm.TU.scaffold_118.460/CpbHLH125	8.26	10.27	9.75	2.28	2.96	2.11	0.81	1.22	0.65	5.01	6.24	5.05	1.27	1.08	1.05	2.14	2.81	2.65	294	393	323	90	112	84	40	48	24	189	242	192	50	43	43	87	103	96	Chr10	39868138	39872865	-	EVM-prediction-scaffold_118.460	--	K16190 glucuronokinase [EC:2.7.1.43] | (RefSeq) transcription factor TDR (A)	ko00040: Pentose and glucuronate interconversions; ko00053: Ascorbate and aldarate metabolism; ko00520: Amino sugar and nucleotide sugar metabolism; ko01100: Metabolic pathways	hypothetical protein AQUCO_01900147v1 [Aquilegia coerulea]	AMS_ARATH RecName: Full=Transcription factor ABORTED MICROSPORES; AltName: Full=Basic helix-loop-helix protein 21; Short=AtbHLH21; Short=bHLH 21; AltName: Full=Transcription factor EN 48; AltName: Full=bHLH transcription factor bHLH021;	A0A3S3P3A8_9MAGN SubName: Full=Transcription factor ABORTED MICROSPORES-like protein isoform X1 {ECO:0000313|EMBL:RWR92352.1};	At2g16910	GO:0005634,nucleus; GO:0003682,chromatin binding; GO:0003700,DNA-binding transcription factor activity; GO:0046983,protein dimerization activity; GO:0000978,RNA polymerase II cis-regulatory region sequence-specific DNA binding; GO:0043565,sequence-specific DNA binding; GO:0048658,anther wall tapetum development; GO:0009555,pollen development; GO:0006355,regulation of transcription, DNA-templated;…
evm.TU.scaffold_118.131/CpbHLH127	0.98	0.76	1.32	0.44	0.15	0.8	0.12	0.22	0.32	1	1.43	1.23	0.15	0.36	0.07	0	0.08	0.08	12	10	15	6	2	11	2	3	4	13	19	16	2	5	1	0	1	1	Chr10	44564875	44569208	-	EVM-prediction-scaffold_118.131	--	K12126 phytochrome-interacting factor 3 | (RefSeq) transcription factor APG-like isoform X1 (A)	ko04075: Plant hormone signal transduction; ko04712: Circadian rhythm - plant	PREDICTED: transcription factor HEC3-like [Elaeis guineensis]	HEC3_ARATH RecName: Full=Transcription factor HEC3; AltName: Full=Basic helix-loop-helix protein 43; Short=AtbHLH43; Short=bHLH 43; AltName: Full=Protein HECATE 3; AltName: Full=Transcription factor EN 119; AltName: Full=bHLH transcription factor bHLH043;	A0A3S3ND88_9MAGN SubName: Full=Transcription factor HEC3-like protein {ECO:0000313|EMBL:RWR92824.1};	At5g09750	GO:0005634,nucleus; GO:0003677,DNA binding; GO:0003700,DNA-binding transcription factor activity; GO:0046983,protein dimerization activity; GO:0048462,carpel formation; GO:0048467,gynoecium development; GO:0006355,regulation of transcription, DNA-templated; GO:0010500,transmitting tissue development; GO:0003674,molecular_function; GO:0003676,nucleic acid binding; GO:0005488,binding; GO:0097159,or…
evm.TU.scaffold_32.108/CpbHLH128	28.46	27.07	29.3	19.91	22.48	18.91	10.31	16.58	11.49	17.61	23.25	20.51	13.2	14.22	12.2	6.97	7.66	8.06	625	639	599	484	525	465	316	401	262	410	556	481	321	351	307	175	173	180	Chr11	1395966	1404476	-	EVM-prediction-scaffold_32.108	--	K18878 BHLH transcription factor Upa20 | (RefSeq) Upa20; transcription factor bHLH137-like (A)	ko04626: Plant-pathogen interaction	Myc-type [Macleaya cordata]	BH074_ARATH RecName: Full=Transcription factor bHLH74; AltName: Full=Basic helix-loop-helix protein 74; Short=AtbHLH74; Short=bHLH 74; AltName: Full=Protein ACTIVATOR FOR CELL ELONGATION 2; AltName: Full=Transcription factor EN 90; AltName: Full=bHLH transcription factor bHLH074;	A0A200PSL7_9MAGN SubName: Full=Myc-type {ECO:0000313|EMBL:OVA01185.1};	At1g10120	GO:0005634,nucleus; GO:0003700,DNA-binding transcription factor activity; GO:0046983,protein dimerization activity; GO:0000976,transcription regulatory region sequence-specific DNA binding; GO:0040008,regulation of growth; GO:0006355,regulation of transcription, DNA-templated; GO:0009637,response to blue light; GO:0003674,molecular_function; GO:0140110,transcription regulator activity; GO:0005488…
evm.TU.scaffold_75.48/CpbHLH131	10.05	12.05	9.61	13.7	15.47	13.02	16.11	10.51	18.86	11.18	11.33	10.97	18.44	18.63	18.69	23.88	25.22	26.71	291	375	259	439	476	422	651	335	567	343	357	339	591	606	620	790	751	786	Chr11	32268790	32278755	-	EVM-prediction-scaffold_75.48	--	K16189 phytochrome-interacting factor 4 | (RefSeq) transcription factor PIF4 (A)	ko04075: Plant hormone signal transduction	PREDICTED: transcription factor PIF1-like isoform X3 [Nelumbo nucifera]	PIF1_ARATH RecName: Full=Transcription factor PIF1; AltName: Full=Basic helix-loop-helix protein 15; Short=AtbHLH15; Short=bHLH 15; AltName: Full=Protein PHY-INTERACTING FACTOR 1; AltName: Full=Protein PHYTOCHROME INTERACTING FACTOR 3-LIKE 5; AltName: Full=Transcription factor EN 101; AltName: Full=bHLH transcription factor bHLH015;	A0A443PZ81_9MAGN SubName: Full=Transcription factor PIF1-like protein isoform X3 {ECO:0000313|EMBL:RWR96069.1};	At2g20180	GO:0005634,nucleus; GO:0003677,DNA binding; GO:0003700,DNA-binding transcription factor activity; GO:0042802,identical protein binding; GO:0010313,phytochrome binding; GO:0046983,protein dimerization activity; GO:0015995,chlorophyll biosynthetic process; GO:0009740,gibberellic acid mediated signaling pathway; GO:0006783,heme biosynthetic process; GO:0009959,negative gravitropism; GO:0010100,negat…
Table S7: Differentially expressed CpbHLHs during flower development of wintersweet genotypes
ID	15Ya-1_fpkm	15Ya-2_fpkm	15Ya-3_fpkm	15Lu-1_fpkm	15Lu-2_fpkm	15Lu-3_fpkm	HLT015-1_fpkm	HLT015-2_fpkm	HLT015-3_fpkm	40Ya-1_fpkm	40Ya-2_fpkm	40Ya-3_fpkm	40Lu-1_fpkm	40Lu-2_fpkm	40Lu-3_fpkm	HLT040-1_fpkm	HLT040-2_fpkm	HLT040-3_fpkm	15Ya-1_count	15Ya-2_count	15Ya-3_count	15Lu-1_count	15Lu-2_count	15Lu-3_count	HLT015-1_count	HLT015-2_count	HLT015-3_count	40Ya-1_count	40Ya-2_count	40Ya-3_count	40Lu-1_count	40Lu-2_count	40Lu-3_count	HLT040-1_count	HLT040-2_count	HLT040-3_count	15Ya_vs_15Lu.log2FoldChange	15Ya_vs_15Lu.pvalue	15Ya_vs_15Lu.padj	15Ya_vs_15Lu.regulated	15Lu_vs_15FUL.log2FoldChange	15Lu_vs_15FUL.pvalue	15Lu_vs_15FUL.padj	15Lu_vs_15FUL.regulated	40Ya_vs_40Lu.log2FoldChange	40Ya_vs_40Lu.pvalue	40Ya_vs_40Lu.padj	40Ya_vs_40Lu.regulated	40Lu_vs_40FUL.log2FoldChange
evm.TU.scaffold_12.223/CpbHLH1	6.48	7.1	4.71	0	0.52	0.31	1.97	1.9	2.16	10.77	11.95	14.11	1.22	0.36	1.04	0.39	0.44	0.29	130	153	88	0	11	7	55	42	45	229	261	302	27	8	24	9	9	6	-4.10479	1.22534e-05	2.58924e-05	down	2.69068	0.000105688	0.000268444	up	-3.67588	3.93114e-37	6.36742e-36	down	-1.01845
evm.TU.scaffold_12.249/CpbHLH2	23.21	25.65	25.45	10.56	12.91	6.9	9.71	13.5	8.92	8.28	8.35	8.31	4.3	2.59	3.5	2.7	2.66	3.3	526	625	537	265	311	175	307	337	210	199	206	201	108	66	91	70	62	76	-0.930256	3.50054e-07	8.51283e-07	false	-0.100307	0.696224	0.752053	false	-1.12188	1.54742e-07	4.93831e-07	down	-0.0662762
evm.TU.scaffold_17.7/CpbHLH4	23.43	30.84	23.93	36.4	35.06	29.74	39.79	34.99	32.57	27.75	29.65	28.22	30.89	26.09	28.85	51.9	51.84	53.91	489	692	465	841	778	695	1159	804	706	614	674	629	714	612	690	1238	1113	1144	0.73437	7.25021e-08	1.85765e-07	false	-0.0901811	0.569672	0.640001	false	0.144944	0.156007	0.205833	false	1.07477
evm.TU.scaffold_52.293/CpbHLH5	0.15	0.91	0.63	4.35	4.62	4.52	1.79	2.81	1.51	0.74	0.54	0.41	0.4	0.22	0.43	0.99	1.29	1.3	3	20	12	98	100	103	51	63	32	16	12	9	9	5	10	23	27	27	3.34663	3.95198e-15	1.63147e-14	up	-1.32687	3.52576e-05	9.58761e-05	down	NA	NA	NA	NA	1.96947
evm.TU.scaffold_21.22/CpbHLH6	3.76	2.55	6.02	14.68	14.38	10.58	5.66	4.34	5.09	5.35	4.68	3.46	11.85	0.22	11.9	4.57	2.42	4.2	59	43	88	255	240	186	124	75	83	89	80	58	206	199	214	82	39	67	2.0557	5.16625e-14	1.99813e-13	up	-1.56381	1.85502e-10	8.82488e-10	down	1.51894	1.03682e-12	5.12553e-12	up	-1.44336
evm.TU.scaffold_648.4/CpbHLH12	6.84	6.36	7.16	1.48	1.51	1.37	5.22	5.31	5.23	12.61	9.54	12.07	4.48	3.38	4.36	3.05	2.99	3.56	200	200	195	48	47	45	213	171	159	391	304	377	145	111	146	102	90	106	-1.85521	2.8281e-14	1.11086e-13	down	1.67201	7.88768e-11	3.86698e-10	up	-1.34635	2.45046e-14	1.35583e-13	down	-0.148759
evm.TU.scaffold_47.115/CpbHLH13	8.37	11.1	10.4	2.83	2.77	3.18	4.86	4.86	4.51	7.89	8.08	9.51	2.59	4.34	4.33	3.93	2.94	4.31	216	308	250	81	76	92	175	138	121	216	227	262	74	126	128	116	78	113	-1.39989	9.52553e-11	3.00805e-10	down	0.515275	0.0366292	0.0589936	false	-1.03271	1.56818e-06	4.47879e-06	down	0.186431
evm.TU.scaffold_55.138/CpbHLH15	43.12	46.1	45.75	0.95	0.8	1.65	0.61	0.22	0.74	43.98	43.36	46.18	3.53	5.02	3.93	0.04	0.23	0	1071	1231	1058	26	21	46	21	6	19	1158	1173	1225	97	140	112	1	6	0	-4.94046	2.26189e-135	1.19455e-133	down	-1.29474	0.0322268	0.0526095	false	-3.2768	2.49321e-140	2.94436e-138	down	-5.35707
evm.TU.scaffold_55.254/CpbHLH16	0.82	0	0	0.49	0.39	0.37	13.15	13.18	14.11	0.65	0.38	0.13	0.37	0	0.12	4.91	2	1.21	6	0	0	4	3	3	134	106	107	5	3	1	3	0	1	41	15	9	NA	NA	NA	NA	4.83689	4.7425e-18	3.71839e-17	up	NA	NA	NA	NA	NA
evm.TU.scaffold_742.240/CpbHLH17	5.15	4.42	4.48	1.88	1.42	1.19	14.85	18.41	13.71	1.58	2.13	3.15	1.52	0.41	0.35	42.91	44.14	46.36	89	82	72	36	26	23	358	350	246	29	40	58	29	8	7	847	784	814	-1.28094	0.000287909	0.000530848	down	3.20515	3.93755e-31	5.5507e-30	up	-1.45546	0.00764414	0.0132138	down	6.07234
evm.TU.scaffold_742.237/CpbHLH19	2.26	1.05	0.73	0.92	0.53	1.11	0.81	1.44	1.31	0.11	0.42	0.32	0	0.1	0	3.26	2.86	4.11	20	10	6	9	5	11	10	14	12	1	4	3	0	1	0	33	26	37	NA	NA	NA	NA	NA	NA	NA	NA	NA	NA	NA	NA	6.76427
evm.TU.scaffold_742.133/CpbHLH21	3.7	2.77	4.2	15.73	19.53	14.63	11.12	14.85	12.41	2.88	2.42	2.98	17.36	14.33	14.9	5.19	4.66	5.43	108	87	114	508	606	478	453	477	376	89	77	93	561	470	498	173	140	161	2.5939	1.58562e-45	1.88279e-44	up	-0.562827	0.0014139	0.00299455	false	2.63256	2.98491e-59	8.77775e-58	up	-1.4097
evm.TU.scaffold_131.115/CpbHLH22	3.97	5.46	4.73	0	0	0.13	0	0	0	1.11	1.28	1.24	0.2	0.2	0.38	0.13	0	0	54	80	60	0	0	2	0	0	0	16	19	18	3	3	6	2	0	0	-6.3612	9.48809e-09	2.60046e-08	down	NA	NA	NA	NA	-2.07195	0.00603356	0.0106014	down	NA
evm.TU.scaffold_122.148/CpbHLH23	8.66	6.92	8.97	1.73	2.18	1.25	6.62	5.76	6.78	9.29	10.05	9.3	2.56	3.12	4.1	11.97	13.72	10.55	284	244	274	63	76	46	303	208	231	323	359	326	93	115	154	449	463	352	-1.88583	2.18421e-15	9.13078e-15	down	1.71686	9.35265e-11	4.55655e-10	up	-1.40595	1.75189e-14	9.78044e-14	down	2.08578
evm.TU.scaffold_122.656/CpbHLH24	0.35	1.56	1.58	0.05	0.57	0.27	0.18	0.28	0	3.44	5.63	4.89	1.83	1.13	2.92	0.09	0.34	0.3	7	33	29	1	12	6	5	6	0	72	121	103	40	25	66	2	7	6	-1.61869	0.0491555	0.0670305	false	NA	NA	NA	NA	-1.10373	0.00120179	0.00236064	down	-2.82807
evm.TU.scaffold_865.209/CpbHLH26	0.28	0.4	0	0	0	0	0	0	0	1.64	1.3	1.25	0.75	0.14	0.41	0	0.11	0.04	7	11	0	0	0	0	0	0	0	44	36	34	21	4	12	0	3	1	NA	NA	NA	NA	NA	NA	NA	NA	-1.55422	0.00372125	0.00677363	down	NA
evm.TU.scaffold_74.30/CpbHLH30	63.06	65.56	59.05	35.62	43.47	36.21	60.36	40.02	57.6	51.39	52.88	53.31	27.66	30.88	30.03	57.71	56.02	62.02	1521	1700	1326	951	1115	978	2032	1063	1443	1314	1389	1373	739	837	830	1591	1390	1521	-0.338505	0.0011	0.00189374	false	0.28168	0.141953	0.196755	false	-0.688331	7.28362e-16	4.42971e-15	false	1.18555
evm.TU.scaffold_752.25/CpbHLH31	7.83	8.84	9.52	18.79	18.96	18	11.04	8.16	11.5	14.9	10.61	10.7	7.77	9.48	8.18	7.64	6.86	6.06	61	74	69	162	157	157	120	70	93	123	90	89	67	83	73	68	55	48	1.45585	6.84262e-10	2.04385e-09	up	-1.03531	3.62057e-05	9.83439e-05	down	-0.367349	0.159713	0.210114	false	-0.106663
evm.TU.scaffold_801.44/CpbHLH32	36.58	23.77	22.47	6.87	3.43	5.23	27.14	28.11	25.34	29.41	27.65	33.83	27.4	24.77	31.86	21.56	12.05	13.61	481	336	275	100	48	77	498	407	346	410	396	475	399	366	480	324	163	182	-2.04426	4.19489e-16	1.82017e-15	down	2.19272	3.005e-18	2.37829e-17	up	0.0287887	0.832638	0.865158	false	-0.626761
evm.TU.scaffold_70.367/CpbHLH36	16.7	15.94	15.2	13.51	12.14	11.89	23.65	35.09	22.8	15.76	16.26	16.3	9.02	8.69	7.9	15.96	12.36	16.39	498	511	422	446	385	397	984	1152	706	498	528	519	298	291	270	544	379	497	0.015712	0.904484	0.919364	false	0.931926	5.5798e-07	1.88491e-06	false	-0.774286	2.92332e-10	1.19854e-09	false	1.00343
evm.TU.scaffold_70.362/CpbHLH37	1.68	1.43	1.05	0.89	1.19	0.25	4.82	3.63	3.51	1.26	0.32	0.2	0.06	0.19	0.06	5.82	5.11	4.62	24	22	14	14	18	4	96	57	52	19	5	3	1	3	1	95	75	67	-0.487879	0.465351	0.518874	false	2.2013	2.7828e-05	7.67627e-05	up	NA	NA	NA	NA	5.84192
evm.TU.scaffold_70.361/CpbHLH38	24.8	26.91	24.74	8.79	9.11	7.37	34.24	34.8	26.47	14.1	14.92	11.91	23.07	18.1	21.35	15.07	12.93	13.83	589	687	547	231	230	196	1135	910	653	355	386	302	607	483	581	409	316	334	-1.23386	7.15849e-18	3.38989e-17	down	1.7411	6.98427e-22	6.66558e-21	up	0.75248	1.03541e-08	3.69174e-08	false	-0.379923
evm.TU.scaffold_70.335/CpbHLH40	6.17	5.67	5.37	2	1.43	1.38	1.73	2.42	1.98	3.83	3.87	3.9	0.83	1.13	0.98	0.51	0.62	0.3	243	240	197	87	60	61	95	105	81	160	166	164	36	50	44	23	25	12	-1.47311	1.40636e-10	4.38925e-10	down	0.16248	0.590769	0.658905	false	-1.84194	7.37029e-14	3.94496e-13	down	-0.839145
evm.TU.scaffold_855.53/CpbHLH41	0.24	0	0	0.08	0.03	0	0.13	0.27	0.26	0	0.25	0	0	0	0.16	0.42	1.1	1.44	8	0	0	3	1	0	6	10	9	0	9	0	0	0	6	16	38	49	NA	NA	NA	NA	NA	NA	NA	NA	NA	NA	NA	NA	4.41423
evm.TU.scaffold_855.88/CpbHLH42	9.05	10.39	8.86	3.15	2.71	2.57	2.78	3.93	4.24	9.75	9.04	8.44	13.85	11.33	11.36	1.51	0.9	1.1	226	279	206	87	72	72	97	108	110	258	246	225	383	318	325	43	23	28	-1.38255	1.66021e-10	5.16191e-10	down	0.187084	0.512264	0.586719	false	0.564949	0.000125261	0.000283436	false	-3.17344
evm.TU.scaffold_130.76/CpbHLH44	39.21	36.62	40.58	19.25	17.32	16.25	17.72	14.2	15.7	37.13	36.17	34.43	22.8	20.14	19.24	9.24	7.57	8.11	1284	1289	1237	698	603	596	810	512	534	1289	1290	1204	827	741	722	346	255	270	-0.774214	3.63509e-13	1.33826e-12	false	-0.324134	0.0506535	0.0789036	false	-0.651918	3.87407e-13	1.97328e-12	false	-1.11832
evm.TU.scaffold_178.166/CpbHLH49	10.2	11.04	6.85	0.33	0.34	0.69	5.21	6.35	5.71	8.97	10.75	11.61	1.8	0.98	1.88	1.88	1.9	1.04	251	292	157	9	9	19	179	172	146	234	288	305	49	27	53	53	48	26	-3.99256	1.07779e-29	8.24073e-29	down	3.47187	2.82132e-20	2.50636e-19	up	-2.609	3.63712e-28	4.11666e-27	down	0.251785
evm.TU.scaffold_89.14/CpbHLH50	16.7	20.7	20.62	11.28	9.6	10.7	11.49	10.46	12.77	23.43	23.15	21.8	20.68	20.47	19.8	7.4	6.34	7.46	535	713	615	400	327	384	514	369	425	796	808	746	734	737	727	271	209	243	-0.512092	0.000291221	0.000536598	false	-0.0428304	0.803213	0.844274	false	-0.0242223	0.793435	0.830929	false	-1.32473
evm.TU.scaffold_92.303/CpbHLH52	41.56	37.43	39.77	16.1	19.96	15.65	48.01	52.04	50.34	49.86	48.85	47.55	42.29	43.89	41.04	45.55	57.25	50.2	1541	1492	1373	661	787	650	2485	2125	1939	1960	1973	1883	1737	1829	1744	1931	2184	1893	-0.834707	5.41092e-14	2.08984e-13	false	1.35973	5.90058e-23	5.92936e-22	up	-0.0591061	0.392207	0.46028	false	0.461602
evm.TU.scaffold_153.587/CpbHLH54	28.71	32.65	32.27	7.88	7.51	7.17	6.4	5.29	5.98	35.02	30.36	32.54	19.88	18.36	19.18	2.83	3.74	4.5	665	813	696	202	185	186	207	135	144	860	766	805	510	478	509	75	89	106	-1.6885	1.2167e-33	1.04847e-32	down	-0.526322	0.0129984	0.0231569	false	-0.628763	1.54389e-09	5.93619e-09	false	-2.18394
evm.TU.scaffold_153.430/CpbHLH55	1.51	0.81	1.79	0.54	0.89	0.71	1.14	3.17	1.03	0.56	1.13	0.74	0.04	0.21	0	0.24	0.35	0.31	38	22	42	15	24	20	40	88	27	15	31	20	1	6	0	7	9	8	-0.571385	0.258235	0.307126	false	1.11965	0.0395235	0.0631844	false	-3.15342	0.00033782	0.000718178	down	NA
evm.TU.scaffold_153.356/CpbHLH56	0.07	0.07	0	1.31	2.11	1.81	0.88	0.4	0.7	0.48	0.27	0.75	0.26	0.77	1.14	1.4	1.34	2.35	1	1	0	20	31	28	17	6	10	7	4	11	4	12	18	22	19	33	5.54944	3.10244e-06	6.93981e-06	up	-1.56362	0.00872537	0.0160837	down	NA	NA	NA	NA	1.41633
evm.TU.scaffold_153.139/CpbHLH58	16.34	18.15	15.58	9.08	10.16	7.97	1.08	0.83	1.76	11.71	12.98	12.58	2.18	2.44	3.85	0.52	0.16	0.63	304	363	270	187	201	166	28	17	34	231	263	250	45	51	82	11	3	12	-0.517221	0.00284208	0.00464522	false	-3.07873	3.92592e-22	3.80162e-21	down	-1.99239	1.22151e-18	8.73849e-18	down	-2.49199
evm.TU.scaffold_153.56/CpbHLH60	14.22	12.06	14.58	3.87	4.68	4.52	20.13	17.82	18.98	9.87	8.46	9.47	9.09	8.96	10.11	22.05	25.47	21.6	329	300	314	99	115	117	650	454	456	242	213	234	233	233	268	583	606	508	-1.27932	1.76646e-11	5.84892e-11	down	1.94712	4.43958e-24	4.7197e-23	up	0.161519	0.305174	0.370311	false	1.49099
evm.TU.scaffold_24.170/CpbHLH62	1.87	2.73	1.72	10.86	9.92	7.75	12.58	5.7	13.5	4.28	3.07	3.94	11.15	10.04	7.93	12.21	11.3	14.71	28	44	24	180	158	130	263	94	210	68	50	63	185	169	136	209	174	224	2.52992	5.71022e-18	2.71217e-17	up	-0.0119631	0.970813	0.978295	false	1.50768	4.70984e-10	1.89515e-09	up	0.590007
evm.TU.scaffold_24.277/CpbHLH63	0.64	0.66	0.53	0.83	1	0.7	0.31	0.84	0.27	0.6	0.91	1.6	0.77	0.44	0.25	0.99	1.52	1.26	9	10	7	13	15	11	6	13	4	9	14	24	12	7	4	16	22	18	NA	NA	NA	NA	NA	NA	NA	NA	NA	NA	NA	NA	1.5662
evm.TU.scaffold_138.9/CpbHLH65	2.25	2.4	2.33	13.91	15.03	16.51	9.96	9.3	6.49	0.39	0.69	0.7	1.43	1.63	2.33	7.07	5.99	8.44	27	31	26	185	192	222	167	123	81	5	9	9	19	22	32	97	74	103	3.07015	7.77773e-31	6.20345e-30	up	-0.9933	5.4084e-05	0.000143375	false	1.7387	0.0041171	0.00743777	up	2.19269
evm.TU.scaffold_176.125/CpbHLH66	38.2	41.78	39.58	9.85	10.8	9.9	19.96	25.85	21.46	26.37	26.37	25.97	11.89	11.24	9.76	4.89	7.24	6.17	1503	1767	1450	429	452	436	1096	1120	877	1100	1130	1091	518	497	440	220	293	247	-1.60395	2.61398e-53	3.7601e-52	down	0.954275	9.03727e-11	4.41274e-10	false	-1.11796	5.84721e-30	7.11225e-29	down	-0.651832
evm.TU.scaffold_176.226/CpbHLH67	6.67	6.9	6.26	6.11	6.05	5.04	10.93	10.97	8.94	4.31	5.01	2.58	2.27	3.61	3.74	16.81	15.1	14.91	143	159	125	145	138	121	327	259	199	98	117	59	54	87	92	412	333	325	0.158549	0.458543	0.512184	false	0.66527	0.00180754	0.00377173	false	-0.159381	0.59839	0.657934	false	2.4782
evm.TU.scaffold_18.530/CpbHLH68	10.86	13.97	10.6	39.32	38.69	34.96	10.56	12.92	11.1	12.44	12.5	12.39	13.49	14.57	15.54	11.83	14.93	14.47	426	589	387	1707	1613	1535	578	558	452	517	534	519	586	642	698	530	602	577	2.03504	8.64069e-66	1.61058e-64	up	-1.89109	1.59345e-46	3.74942e-45	down	0.366533	0.000622503	0.0012752	false	0.113461
evm.TU.scaffold_18.431/CpbHLH69	21.28	21.12	23.62	7.68	6.62	5.72	13.11	17.39	14.1	21	22.2	21.85	16.12	19.33	21.91	13.2	16.53	17.87	478	510	494	191	158	144	411	430	329	500	543	524	401	488	564	339	382	408	-1.35656	5.55456e-17	2.51697e-16	down	0.971011	1.15873e-06	3.78206e-06	false	-0.0373423	0.770496	0.811852	false	-0.0756235
evm.TU.scaffold_18.355/CpbHLH70	40.73	39.97	34.7	3.62	3.97	3.77	12.4	17.26	11.76	25.59	27.31	26.78	10.29	10.6	9.47	1.65	0.98	2.14	1494	1576	1185	147	155	155	635	697	448	995	1091	1049	418	437	398	69	37	80	-2.97834	4.05606e-119	1.71041e-117	down	1.67983	2.25183e-17	1.69789e-16	up	-1.25017	4.33855e-37	7.01206e-36	down	-2.47077
evm.TU.scaffold_18.346/CpbHLH71	0	0	0	2.53	3.09	2.01	1.61	1.04	1.76	0	0	0	1.37	1.35	0.97	4.87	5.68	5.47	0	0	0	81	95	65	65	33	53	0	0	0	44	44	32	161	169	161	9.00603	2.99936e-13	1.109e-12	up	-0.960912	0.00645449	0.0122069	false	7.83806	7.415e-10	2.93393e-09	up	2.31448
evm.TU.scaffold_5.167/CpbHLH74	0.26	0.05	0.22	0.14	0.05	0.05	0.88	2.29	1.29	0.1	0	0.19	0.23	0	0.13	1.62	0.75	0.56	5	1	4	3	1	1	24	49	26	2	0	4	5	0	3	36	15	11	NA	NA	NA	NA	4.05317	6.89138e-06	2.05406e-05	up	NA	NA	NA	NA	NA
evm.TU.scaffold_250.23/CpbHLH77	30.92	33.08	29.6	7.93	9.88	7.63	33.62	37.78	29.64	40.28	37.83	38.92	22.62	29.42	26.19	113.02	112.59	116.36	680	782	606	193	231	188	1032	915	677	939	906	914	551	727	660	2841	2547	2602	-1.51615	1.63996e-25	1.07845e-24	down	1.81005	7.77435e-25	8.53927e-24	up	-0.437803	5.88693e-05	0.000138487	false	2.32465
evm.TU.scaffold_731.73/CpbHLH78	0	0.69	0.28	0.28	0.78	1.02	3.15	2.43	3.21	0	0.04	0.08	0	0.08	0	3.57	3.5	3.54	0	17	6	7	19	26	100	61	76	0	1	2	0	2	0	93	82	82	1.4446	0.105366	0.135753	false	1.89938	6.16997e-05	0.000162244	up	NA	NA	NA	NA	7.28522
evm.TU.scaffold_64.63/CpbHLH82	40.76	42.08	41.8	104.98	107.56	101.65	61.32	62.32	58.67	38.67	42.83	35.35	51.16	56.84	49.87	89.36	93.74	92.42	1192	1323	1138	3399	3345	3329	2503	2007	1782	1199	1364	1104	1657	1868	1671	2987	2820	2748	1.69917	1.19689e-104	4.1417e-103	up	-0.9651	1.05591e-18	8.64524e-18	false	0.576683	5.20499e-11	2.26022e-10	false	1.00018
evm.TU.scaffold_147.125/CpbHLH83	5.48	6.15	4.76	1.6	1.59	1.49	1.82	2.85	1.98	3.5	3.57	2.98	4.46	4.39	4.55	1.11	1.43	1.27	272	328	220	88	84	83	126	156	102	184	193	158	245	245	259	63	73	64	-1.44208	3.02505e-12	1.0517e-11	down	0.316564	0.24487	0.314944	false	0.557886	0.000612268	0.00125571	false	-1.62145
evm.TU.scaffold_147.57/CpbHLH84	2.66	1.8	2.07	0.71	1.13	0.57	1.36	2.28	2.42	1.27	1.34	1.59	0.9	1.3	0.92	0.23	0.85	1.04	91	66	66	27	41	22	65	86	86	46	50	58	34	50	36	9	30	36	-1.07229	0.00456298	0.00726259	down	1.1406	0.0049007	0.00947174	up	-0.286896	0.409289	0.47714	false	-0.374993
evm.TU.scaffold_35.39/CpbHLH86	43.46	41.93	45.13	62.05	66.9	66.16	11.85	17.94	12.17	37.62	34.82	37.02	43.96	47.02	42.22	8.19	8.52	7.84	2083	2161	2014	3293	3410	3552	793	947	606	1912	1818	1895	2334	2533	2319	449	420	382	0.946192	3.46174e-33	2.94873e-32	false	-2.40497	1.30661e-49	3.40468e-48	down	0.425064	3.97969e-09	1.47577e-08	false	-2.24245
evm.TU.scaffold_35.57/CpbHLH87	10.8	13.69	12.96	83.57	71.97	78.03	14.3	18.41	14.57	16.58	16.23	14.52	29.91	34.9	27.39	12.73	15.49	12.75	204	278	228	1748	1446	1651	377	383	286	332	334	293	626	741	593	275	301	245	3.00569	2.55265e-134	1.31982e-132	up	-2.48957	1.30851e-63	5.10224e-62	down	1.10444	3.81862e-18	2.65768e-17	up	-0.974618
evm.TU.scaffold_96.612/CpbHLH88	9.61	6.93	8.46	23.66	19.92	16.42	5.59	4.87	4.23	1.05	2.3	0.98	1.7	3.84	3.04	15.36	13.14	12.88	138	107	113	376	304	264	112	77	63	16	36	15	27	62	50	252	194	188	1.62962	3.95302e-16	1.71757e-15	up	-2.20032	1.24578e-20	1.12409e-19	down	1.13303	0.0145667	0.0239647	up	2.4664
evm.TU.scaffold_96.505/CpbHLH89	0.13	1.23	0.19	0.08	0	0.16	0.38	0.24	0.04	0.71	0.69	0.78	0.04	0.08	0	1.43	1.16	1.13	3	30	4	2	0	4	12	6	1	17	17	19	1	2	0	37	27	26	NA	NA	NA	NA	NA	NA	NA	NA	NA	NA	NA	NA	5.17985
evm.TU.scaffold_162.252/CpbHLH91	8.59	8.51	6.41	0	0.43	0.27	0.18	0.37	0.1	4.86	5.52	7.05	0.05	0.22	0.4	0.53	0.39	1.29	170	181	118	0	9	6	5	8	2	102	119	149	1	5	9	12	8	26	-4.71863	1.08875e-22	6.38033e-22	down	NA	NA	NA	NA	-4.55375	1.427e-21	1.18184e-20	down	NA
evm.TU.scaffold_162.154/CpbHLH92	8.36	10.17	8.23	0.5	1.44	0.4	1.75	2.56	1.21	5.36	5.79	4.79	0.91	1.46	1.43	0.79	0.27	0.55	240	314	220	16	44	13	70	81	36	163	181	147	29	47	47	26	8	16	-3.15723	9.05514e-22	5.10814e-21	down	1.0544	0.0488892	0.0764443	false	-1.92415	1.32757e-13	6.99184e-13	down	-1.02841
evm.TU.scaffold_421.98/CpbHLH94	6.77	8.91	9.4	3.4	2.89	3.66	6.03	3.66	4.08	8	7.91	6.08	2.1	2.5	2.03	6.94	8.71	5.99	99	140	128	55	45	60	123	59	62	124	126	95	34	41	34	116	131	89	-0.966172	0.000675306	0.00119316	false	0.300866	0.391561	0.4685	false	-1.58902	2.64784e-08	9.11191e-08	down	1.90372
evm.TU.scaffold_797.37/CpbHLH95	0.81	0.5	0.49	0.51	0.48	0.51	0.85	0.78	0.91	0.66	0.77	0.56	0.58	0.36	0.28	1.74	1.81	1.72	30	20	17	21	19	21	44	32	35	26	31	22	24	15	12	74	69	65	0.101612	0.847074	0.870121	false	0.582645	0.19574	0.260113	false	-0.556205	0.273141	0.336136	false	2.30611
evm.TU.scaffold_149.203/CpbHLH96	8.6	7.67	7.29	2.07	2.32	2.27	4.16	5.32	3.8	4.79	5.82	5.04	2.02	1.48	2.06	1.34	1.59	1.24	342	328	270	91	98	101	231	233	157	202	252	214	89	66	94	61	65	50	-1.45872	1.92447e-14	7.63626e-14	down	0.814003	0.000556031	0.00125819	false	-1.35085	6.48308e-11	2.79679e-10	down	-0.219084
evm.TU.scaffold_577.3/CpbHLH98	8.32	11.57	12.66	2.17	1.76	0.98	5.67	5.71	5.3	2.98	3.24	3.31	2.77	2.59	2.92	0.71	1.09	1.57	266	398	377	77	60	35	253	201	176	101	113	113	98	93	107	26	36	51	-2.36675	3.60134e-20	1.88444e-19	down	1.58613	1.17057e-07	4.25228e-07	up	-0.0619565	0.782684	0.822404	false	-1.10571
evm.TU.scaffold_155.80/CpbHLH99	8.62	9.75	9.07	2.36	2.48	2.2	6.42	4.19	7.43	26.01	22.98	26.76	24.65	25.56	27.09	15.41	17.68	15.08	284	345	278	86	87	81	295	152	254	908	824	941	899	946	1022	580	599	505	-1.59847	3.49989e-16	1.52487e-15	down	1.18317	2.09162e-05	5.87202e-05	up	0.171494	0.0728391	0.103757	false	-0.485964
evm.TU.scaffold_26.342/CpbHLH101	10.93	7.56	9.64	2.94	2.75	3.54	3.45	4.9	3.38	6.13	6.27	8.04	5.28	5.32	5.9	1.71	2.59	2.11	168	125	138	50	45	61	74	83	54	100	105	132	90	92	104	30	41	33	-1.23723	7.21233e-06	1.56014e-05	down	0.157355	0.638592	0.701847	false	-0.165781	0.478233	0.54435	false	-1.1735
evm.TU.scaffold_26.162/CpbHLH103	10.36	9.71	11.13	2.75	2.38	1.81	3.89	4.61	4.32	6.01	5.79	5.84	1.37	2.26	1.96	15.47	12.89	18.03	143	144	143	42	35	28	75	70	62	88	87	86	21	35	31	244	183	253	-1.80276	4.70256e-10	1.41896e-09	down	0.702681	0.0476027	0.074668	false	-1.51304	2.80134e-06	7.76623e-06	down	3.24875
evm.TU.scaffold_90.277/CpbHLH105	0.37	1.12	0.73	0.42	0	0	0.79	1.8	0.85	1.63	1.39	1.27	0.24	0	0.36	5.85	8.99	7.24	7	23	13	9	0	0	21	38	17	33	29	26	5	0	8	128	177	141	NA	NA	NA	NA	NA	NA	NA	NA	-2.69219	0.000119203	0.000270387	down	5.3891
evm.TU.scaffold_8.109/CpbHLH109	3.54	7.66	6.11	0	0.21	0	0.06	0.24	0	1.94	2.63	3.1	0	0.64	0.51	0	0.17	0	79	184	127	0	5	0	2	6	0	46	64	74	0	16	13	0	4	0	-6.02533	2.04831e-06	4.65412e-06	down	NA	NA	NA	NA	-2.59218	0.0223804	0.035488	down	NA
evm.TU.scaffold_108.51/CpbHLH110	28.41	27.52	30.91	0	0	0.07	0	0	0	10.02	12.44	14.02	0.33	0.47	0.43	0	0.24	0.04	698	727	707	0	0	2	0	0	0	261	333	368	9	13	12	0	6	1	-9.82634	1.49043e-21	8.31472e-21	down	NA	NA	NA	NA	-4.74938	1.03026e-52	2.58665e-51	down	NA
evm.TU.scaffold_128.104/CpbHLH111	0.52	0.63	0.17	0	0	0	0	0	0.05	2.16	1.48	1.76	0.14	0.09	0.27	0	0.25	0	10	13	3	0	0	0	0	0	1	44	31	36	3	2	6	0	5	0	NA	NA	NA	NA	NA	NA	NA	NA	-3.26809	4.69322e-07	1.4207e-06	down	NA
evm.TU.scaffold_59.62/CpbHLH112	4.96	4.4	5.03	7.01	8.3	7.01	4.42	6.03	5.56	4.12	3.86	3.3	2.94	3.06	3.91	16.83	21.69	21.5	218	208	206	341	388	345	271	292	254	192	185	155	143	151	197	846	981	961	0.998577	4.37903e-10	1.3235e-09	false	-0.665724	0.00028046	0.0006661	false	-0.0448678	0.817088	0.851538	false	2.79329
evm.TU.scaffold_86.256/CpbHLH113	1.56	1.59	1.27	0.39	0.26	0.67	3.19	1.64	3.15	1.65	0.94	1.05	0.23	0.03	0.27	0.57	0.73	0.67	50	55	38	14	9	24	143	58	105	56	33	36	8	1	10	21	24	22	-1.36629	0.00470404	0.00747491	down	2.4133	2.59853e-07	9.10193e-07	up	-2.65357	8.40278e-06	2.19485e-05	down	2.10638
evm.TU.scaffold_86.142/CpbHLH114	12.5	13.15	10.61	0	0	0	0.29	0.64	0.31	5.88	7.38	4.91	0.03	0.05	0.03	0	0	0	429	485	339	0	0	0	14	24	11	214	276	180	1	2	1	0	0	0	-10.9065	5.94455e-20	3.08219e-19	down	NA	NA	NA	NA	-7.31275	4.22624e-22	3.57851e-21	down	NA
evm.TU.scaffold_86.2/CpbHLH115	18.93	14.78	19.83	6.04	5.3	4.8	15.65	16.33	21.53	27.4	25.4	27.87	12.36	11.22	12.68	16.58	15.34	15.27	722	606	704	255	215	205	833	686	853	1108	1055	1135	522	481	554	723	602	592	-1.36354	1.5189e-18	7.40618e-18	down	1.54734	1.19557e-16	8.65602e-16	up	-1.01205	1.73609e-25	1.74077e-24	down	0.579
evm.TU.scaffold_174.7/CpbHLH116	28.83	33.6	27.34	1.09	2.67	1.4	12.36	18.62	14.86	8.31	10.85	6.83	2.45	2.84	3.63	0.74	1.06	1.72	478	599	422	20	47	26	286	340	256	146	196	121	45	53	69	14	18	29	-3.76491	1.75713e-53	2.54572e-52	down	2.97019	3.62119e-20	3.19613e-19	up	-1.3968	1.06993e-07	3.47761e-07	down	-1.15765
evm.TU.scaffold_174.48/CpbHLH117	0.3	0.28	0	0	0.14	0	0.98	1.61	2.58	4.2	2.46	4.26	0.59	0.68	0.84	0.84	1.28	1.44	6	6	0	0	3	0	27	35	53	88	53	90	13	15	19	19	26	29	NA	NA	NA	NA	5.02206	1.88366e-06	6.01338e-06	up	-2.23081	1.98888e-08	6.92324e-08	down	0.947064
evm.TU.scaffold_103.58/CpbHLH118	26.71	22.72	25.72	4.96	4.94	4.16	12.43	18.29	16.47	16.36	16.75	15.76	8.02	8.52	8.96	5.92	6.05	6.59	773	707	693	159	152	135	502	583	495	502	528	487	257	277	297	196	180	194	-2.05217	6.67023e-44	7.66593e-43	down	1.55895	2.85962e-15	1.90374e-14	up	-0.796216	1.84777e-10	7.70162e-10	false	-0.261214
evm.TU.scaffold_13.23/CpbHLH119	0	0.26	0	0	0	0	0	0	0	1.12	1.53	1.5	0	0	0	0	0	0	0	4	0	0	0	0	0	0	0	17	24	23	0	0	0	0	0	0	NA	NA	NA	NA	NA	NA	NA	NA	-6.78346	5.58982e-07	1.67965e-06	down	NA
evm.TU.scaffold_13.38/CpbHLH120	7.22	6.84	9.2	0.55	0.51	0.24	1.35	2.21	2.6	5.22	4.71	4.86	0.18	0	0.12	0.35	0.26	0	107	109	127	9	8	4	28	36	40	82	76	77	3	0	2	6	4	0	-3.80358	1.84361e-17	8.57005e-17	down	2.05849	0.000885931	0.00194112	up	-5.48393	6.44368e-14	3.46812e-13	down	NA
evm.TU.scaffold_727.16/CpbHLH123	4.8	4.4	3.48	2.14	1.91	1.36	3	1.96	2.31	1.18	1.67	0.95	0.95	1.44	0.97	0.89	1.41	1.26	142	140	96	70	60	45	124	64	71	37	54	30	31	48	33	30	43	38	-0.868561	0.00215679	0.00358082	false	0.263323	0.440951	0.517417	false	-0.034035	0.930703	0.94437	false	0.274156
evm.TU.scaffold_118.460/CpbHLH125	8.26	10.27	9.75	2.28	2.96	2.11	0.81	1.22	0.65	5.01	6.24	5.05	1.27	1.08	1.05	2.14	2.81	2.65	294	393	323	90	112	84	40	48	24	189	242	192	50	43	43	87	103	96	-1.58181	3.68033e-15	1.52188e-14	down	-1.63954	2.51414e-06	7.92875e-06	down	-2.12124	5.94917e-20	4.55837e-19	down	1.35714
Table S8: Expressed CpbHLHs in different organs of wintersweet
gene_id	Cotyledon1	Cotyledon2	Cotyledon3	Leaf1	Leaf2	Leaf3	Root1	Root2	Root3	flower1	flower2	flower3
evm.TU.scaffold_12.223/CpbHLH1	2.96123	3.18452	2.00264	1.11987	1.49865	1.10206	0.454641	1.05292	0.356374	0	0	0.148875
evm.TU.scaffold_12.249/CpbHLH2	0.054333	0.127676	0	0	0.120051	0.118212	18.2001	13.2796	22.9697	0.401554	3.58827	4.23381
evm.TU.scaffold_12.416/CpbHLH3	22.7631	20.3412	28.5237	37.2324	35.1253	88.3722	12.1471	11.57	10.6657	25.8424	30.5483	37.4179
evm.TU.scaffold_17.7/CpbHLH4	21.2116	21.1689	21.6072	20.7959	21.4524	15.3721	21.5648	24.0686	22.0267	26.4154	25.361	27.5073
evm.TU.scaffold_52.293/CpbHLH5	2.77593	0.37634	0.182647	0.82353	0.850892	0.083626	0.098965	0	0	0.352131	2.11723	1.97074
evm.TU.scaffold_21.22/CpbHLH6	0.34403	0.089757	0	0.63096	0.388337	0.058322	0.493401	0.469431	1.01857	32.3572	18.5238	27.2927
evm.TU.scaffold_21.70/CpbHLH9	0.336884	0.369543	0.518119	2.02605	1.21522	1.40212	0.1314	0	0.136914	2.04878	0.96591	1.2716
evm.TU.scaffold_21.75/CpbHLH10	1.7075	1.68029	1.89093	6.01095	4.58721	5.15094	0	0	0	0.191	0.03128	0.186155
evm.TU.scaffold_648.4/CpbHLH12	3.00482	2.92484	4.1415	5.45582	4.42457	6.30361	1.56211	3.3556	2.78357	0.560283	2.00352	3.11862
evm.TU.scaffold_47.115/CpbHLH13	5.10874	5.37939	10.6812	12.1661	8.26212	11.4399	4.71931	9.84906	6.56986	0.545956	2.14852	2.86982
evm.TU.scaffold_47.202/CpbHLH14	0	0	0.110125	0	2.72128	0	251.187	14.4181	12.0191	0	0	0
evm.TU.scaffold_55.254/CpbHLH16	0	0	0	0	0	0	25.2922	6.47765	23.3818	1.53537	0.576026	0.438606
evm.TU.scaffold_742.240/CpbHLH17	0.779725	0.604719	0.196017	0.183977	0.371658	0.085429	0.503497	2.93494	1.75958	11.9357	10.7694	6.3379
evm.TU.scaffold_742.133/CpbHLH21	14.6535	16.5823	19.576	28.5511	24.4114	29.7768	1.19044	0.255304	0.132653	14.028	15.6301	15.9113
evm.TU.scaffold_122.148/CpbHLH23	18.3801	14.3587	14.327	7.28864	7.24986	7.516	58.2751	85.0127	51.9832	2.00811	5.46605	5.04668
evm.TU.scaffold_122.656/CpbHLH24	3.14815	1.83899	2.18275	8.44745	5.98313	4.94749	0.132986	0	0	0.276921	0.420281	0.088485
evm.TU.scaffold_865.617/CpbHLH29	0.879073	0.600075	0.750589	0.780006	1.06745	1.07457	0.875617	1.15752	1.4443	0.821555	1.25178	0.833502
evm.TU.scaffold_74.30/CpbHLH30	64.0538	57.5652	76.132	64.7479	61.5673	91.0991	58.4229	94.5362	89.2016	15.2911	19.8383	18.6327
evm.TU.scaffold_752.25/CpbHLH31	1.52047	1.09751	0.494313	6.17345	3.5406	2.25102	13.6202	18.7433	15.6938	0.402479	9.61968	15.3241
evm.TU.scaffold_801.44/CpbHLH32	1.01851	0.908654	1.48693	2.11182	2.45129	1.07534	38.2132	81.483	60.9756	1.5835	3.76752	4.88238
evm.TU.scaffold_70.545/CpbHLH33	3.64997	3.61296	3.91585	5.76935	5.15197	7.71289	6.06236	9.87726	10.1238	1.56153	1.60758	1.92005
evm.TU.scaffold_70.367/CpbHLH36	0.403391	0.382759	0.328794	0.265322	0.264362	0.48436	23.6239	9.57255	12.6374	2.90404	6.67036	10.2905
evm.TU.scaffold_70.362/CpbHLH37	0	0	0	0	0	0	1.02821	1.09108	0.525788	0	1.10369	0.73476
evm.TU.scaffold_70.361/CpbHLH38	0.191832	0.084372	0.067085	0.10685	0.075242	0.102065	29.9889	14.388	19.5745	1.09619	8.22124	4.49677
evm.TU.scaffold_70.335/CpbHLH40	1.88906	1.30438	0.979517	3.6249	3.26395	7.34276	11.2266	10.4099	13.4392	0.801067	1.5927	1.69793
evm.TU.scaffold_855.88/CpbHLH42	5.09188	7.04239	18.2815	6.48276	3.50728	15.5217	2.30781	0.886875	1.42696	1.95964	1.40434	1.69962
evm.TU.scaffold_145.109/CpbHLH43	35.6683	42.8351	43.3685	71.2915	66.8582	95.6361	40.118	33.482	44.5709	22.9743	21.711	22.5008
evm.TU.scaffold_130.76/CpbHLH44	20.3374	18.7892	26.6392	18.5753	16.2833	42.6143	3.92736	6.42309	5.01284	2.56654	4.02521	3.53085
evm.TU.scaffold_130.236/CpbHLH45	2.3898	1.26313	1.4207	3.43813	3.63581	3.13674	3.56005	3.9179	3.48137	0	0.068765	0
evm.TU.scaffold_117.425/CpbHLH46	0.022084	0.165644	0.128455	0.141517	0	0	1.55673	1.55504	3.83147	0	0.023426	0.13771
evm.TU.scaffold_178.166/CpbHLH49	2.32357	2.31762	0.158694	0.153267	0.560442	0.411936	0.026055	0.185841	0.154133	0	1.08119	0.658944
evm.TU.scaffold_89.14/CpbHLH50	11.4116	9.78163	10.7043	13.3673	13.4238	27.9609	5.20472	4.04786	4.36513	5.58884	8.56627	5.9808
evm.TU.scaffold_92.439/CpbHLH51	0.751635	0.818911	0.694898	0.838295	0.699278	2.71287	11.8932	5.09624	7.98835	1.55608	1.80401	2.39008
evm.TU.scaffold_92.303/CpbHLH52	18.8083	21.3372	25.7579	13.6121	14.3364	13.4838	61.61	78.3225	69.5489	17.7077	19.0561	18.6707
evm.TU.scaffold_92.17/CpbHLH53	8.87883	8.42205	7.22674	13.0213	13.4413	13.3155	69.3576	85.8186	68.4092	7.71069	17.437	17.1359
evm.TU.scaffold_153.587/CpbHLH54	8.9226	7.52481	6.45039	5.49261	5.53279	5.77762	16.1046	25.4139	26.6946	1.4394	2.61512	3.00404
evm.TU.scaffold_153.244/CpbHLH57	3.7389	1.20257	0.920283	11.6512	13.6216	26.9089	0	0	0	0	0	0
evm.TU.scaffold_153.139/CpbHLH58	0	0	0	0	0	0	0	0	0.081787	1.69115	1.36299	1.51016
evm.TU.scaffold_153.56/CpbHLH60	26.1088	27.475	26.0336	26.2883	15.9334	10.3361	34.7645	8.68559	12.9389	8.27523	7.13452	9.67343
evm.TU.scaffold_24.32/CpbHLH61	3.69255	3.55375	3.28033	4.87242	7.04308	6.22752	3.64097	5.30825	4.11243	4.50782	4.45068	5.34427
evm.TU.scaffold_24.170/CpbHLH62	9.91408	5.48636	8.16836	6.68618	6.66699	3.4245	8.7128	7.20039	10.6176	3.24795	2.40703	2.7532
evm.TU.scaffold_24.277/CpbHLH63	1.15376	0.85997	1.2564	1.04781	1.3794	3.79025	0.114865	0.124339	0.122545	0.555968	0.282297	1.00489
evm.TU.scaffold_907.22/CpbHLH64	17.2297	16.7293	15.1693	11.9652	13.4537	15.0378	24.3075	25.7735	35.8884	9.33358	13.433	14.4784
evm.TU.scaffold_138.9/CpbHLH65	2.51288	3.23451	1.31421	10.0028	13.9127	2.77874	0	0.119022	0.048742	2.30313	9.84409	9.36175
evm.TU.scaffold_176.125/CpbHLH66	9.68908	6.24084	5.9684	4.26832	7.7749	8.22718	16.6837	8.48304	13.5035	1.97934	6.17589	7.63949
evm.TU.scaffold_176.226/CpbHLH67	6.54801	6.10611	2.55551	2.86707	1.69756	0.634466	9.30806	7.2106	8.43571	22.5237	17.2112	22.201
evm.TU.scaffold_18.530/CpbHLH68	7.7995	6.57209	8.57645	8.75725	9.23711	10.6414	9.17154	10.2972	11.1125	17.7888	17.8933	18.4843
evm.TU.scaffold_18.431/CpbHLH69	24.6109	22.1273	25.2868	38.499	38.7611	22.4717	3.73257	10.0645	8.75927	3.98177	8.88349	10.515
evm.TU.scaffold_18.355/CpbHLH70	2.16576	0.81647	0.304058	1.04903	1.65224	2.09893	25.3261	19.1301	21.5236	2.05408	2.39813	2.83664
evm.TU.scaffold_18.346/CpbHLH71	3.03238	1.75155	1.69962	4.48505	3.41021	1.12919	3.07684	4.39851	5.75104	2.87742	1.86492	2.57328
evm.TU.scaffold_18.167/CpbHLH73	6.68282	4.8696	5.80921	3.32134	2.79726	8.80035	8.26419	11.343	8.29152	19.4587	21.5013	23.9939
evm.TU.scaffold_5.11/CpbHLH75	14.9881	15.0086	16.4872	12.8446	12.717	13.6414	6.93461	11.5331	9.55793	9.81632	11.3422	15.4726
evm.TU.scaffold_23.121/CpbHLH76	15.4672	16.9982	19.7051	11.5113	13.8442	14.3384	12.6971	17.67	15.852	2.44488	3.83823	4.20685
evm.TU.scaffold_250.23/CpbHLH77	5.45594	4.13283	4.89208	9.82939	10.0596	11.3931	6.90073	27.9296	24.8074	27.1346	18.4273	17.1897
evm.TU.scaffold_731.73/CpbHLH78	0.919753	2.12971	1.57694	8.85385	8.36688	8.95481	0	0	0	10.433	3.24671	6.77149
evm.TU.scaffold_179.88/CpbHLH81	6.45932	5.08003	6.13029	7.57591	8.03342	9.69961	4.2482	9.99369	7.75005	1.9468	1.96592	1.94905
evm.TU.scaffold_64.63/CpbHLH82	44.3338	38.8254	35.4381	44.8854	45.5845	46.9549	51.1809	34.4183	41.448	141.593	132.324	133.129
evm.TU.scaffold_147.125/CpbHLH83	16.1025	16.9382	36.198	19.4637	18.3316	29.8258	1.57911	1.44819	1.10255	1.78264	2.94022	2.46238
evm.TU.scaffold_147.57/CpbHLH84	1.39863	0.926211	0.804942	1.12591	2.07477	1.68121	2.5608	2.14282	3.26703	0.481715	1.07069	1.11918
evm.TU.scaffold_141.209/CpbHLH85	0.554683	0.421629	0.429004	3.57398	0.741693	0.201226	0.988673	1.07576	1.25627	0	0	0
evm.TU.scaffold_35.39/CpbHLH86	16.7972	20.9694	16.6899	42.74	44.5613	24.9781	7.68059	10.329	9.82941	11.7706	16.1204	15.4687
evm.TU.scaffold_35.57/CpbHLH87	10.926	9.07784	9.23728	12.1442	11.4333	23.7603	11.4824	14.0156	14.9457	81.1989	84.1637	82.763
evm.TU.scaffold_96.612/CpbHLH88	3.21818	1.88071	0.451145	1.33158	1.21059	2.68849	8.36733	5.1241	11.5144	36.5357	29.9031	49.3952
evm.TU.scaffold_96.505/CpbHLH89	19.2751	14.3553	15.4917	3.0649	5.20169	0.533804	7.52001	7.04959	6.4901	1.67901	3.22671	3.85266
evm.TU.scaffold_162.478/CpbHLH90	0.984086	1.53909	0.941555	3.58452	6.24073	9.69978	0.033037	0.16698	0	0.094985	0.638954	0.222487
evm.TU.scaffold_162.252/CpbHLH91	0.153767	0.150617	0.212604	0.458653	0.492664	0.940881	0.676957	1.3041	1.09311	0.117421	0	0.146648
evm.TU.scaffold_162.11/CpbHLH93	5.23594	5.17134	5.45619	7.35215	5.86695	6.38109	5.98158	7.35436	5.61034	9.48907	8.31718	8.68131
evm.TU.scaffold_421.98/CpbHLH94	3.62245	2.22164	2.74822	3.38476	2.86338	1.18524	13.204	13.6452	18.2545	0.992027	2.01222	1.87526
evm.TU.scaffold_797.37/CpbHLH95	0.882149	0.653299	0.537327	0.86344	1.39446	1.4081	1.93628	2.61238	4.42176	0.031899	0.408353	0.401178
evm.TU.scaffold_149.203/CpbHLH96	0.127705	0.237591	0.292358	0	0	0	11.3332	11.7221	15.5916	2.80012	1.19888	1.82865
evm.TU.scaffold_149.239/CpbHLH97	0	0	0	0	0	0	1.90325	0.622184	1.6001	0	0.118129	0
evm.TU.scaffold_577.3/CpbHLH98	3.61146	3.53586	3.81048	3.41022	4.15409	3.0387	3.51062	5.49176	5.94357	1.14478	1.82517	1.79211
evm.TU.scaffold_155.80/CpbHLH99	5.55628	7.43042	9.04838	6.71059	9.52778	6.47529	10.7879	14.0928	18.0801	1.52449	2.55986	3.03983
evm.TU.scaffold_26.342/CpbHLH101	8.18138	7.25953	10.1905	9.92885	7.44915	17.9821	0.14738	0.374391	0.373777	0.782659	1.82154	1.63572
evm.TU.scaffold_26.180/CpbHLH102	0	0	0	0	0	0	4.05473	1.07679	1.95756	0	0.042655	0
evm.TU.scaffold_26.162/CpbHLH103	0.610904	0.458819	0.313386	1.52925	0.439659	0.471775	1.98436	1.38991	0.994259	5.47472	8.97053	15.3824
evm.TU.scaffold_90.277/CpbHLH105	0	0	0	0	0	0	0.093448	0.426801	0.064302	1.19939	0.679108	1.52646
evm.TU.scaffold_90.135/CpbHLH106	7.78895	8.05768	6.43199	23.5641	18.3991	14.7293	12.8564	6.71976	10.2591	1.18292	2.70995	2.70268
evm.TU.scaffold_8.109/CpbHLH109	0.320961	0.24345	0.314312	0.517315	1.14195	4.50877	6.62822	4.4483	6.21798	0	0	0
evm.TU.scaffold_59.62/CpbHLH112	25.3666	39.2581	25.6165	44.8086	47.1811	29.3244	3.4649	5.5974	3.6037	19.0928	21.5121	27.3295
evm.TU.scaffold_86.256/CpbHLH113	2.24904	1.97702	1.97082	6.99698	7.08524	27.2352	0.140762	0.104924	0	0	0.671043	0.394943
evm.TU.scaffold_86.142/CpbHLH114	16.8705	14.2669	11.8248	35.8066	35.7157	94.9061	0.195048	0.282323	0.961349	0	0	0.058013
evm.TU.scaffold_86.2/CpbHLH115	17.9162	19.2959	20.52	17.4703	17.8459	15.9539	21.5257	10.961	10.108	5.4997	4.50672	5.63206
evm.TU.scaffold_174.7/CpbHLH116	2.50205	0.687594	0.32744	3.76884	4.57041	1.39942	0	0	0	0.277029	3.17538	3.9386
evm.TU.scaffold_174.48/CpbHLH117	0	0	0.174553	0	0	0	18.0554	42.8679	34.7003	0	0	0
evm.TU.scaffold_103.58/CpbHLH118	37.842	31.744	16.4346	34.7381	49.0367	47.2737	29.272	18.5852	19.7857	3.22425	4.16168	4.80183
evm.TU.scaffold_13.38/CpbHLH120	2.22131	2.59484	4.20264	5.39436	4.31577	8.84079	0.863344	0.677157	0.456881	0.114575	0	0.171461
evm.TU.scaffold_136.3/CpbHLH121	15.5046	13.5471	15.3807	15.5929	17.3122	19.4125	9.14046	11.2836	9.20023	12.0001	11.8067	15.3688
evm.TU.scaffold_167.32/CpbHLH122	8.77686	10.8404	13.4722	6.99965	7.739	6.80499	12.606	3.34123	4.06244	14.5549	9.97407	12.0157
evm.TU.scaffold_727.16/CpbHLH123	4.04582	1.40095	0.455955	1.05192	1.16078	0.566676	8.30066	4.13778	8.0398	0.168233	1.24345	1.17029
evm.TU.scaffold_118.460/CpbHLH125	1.8074	1.3017	1.57006	2.56109	2.10286	2.8313	0.781862	0.904988	1.04867	2.0741	1.85132	1.46817
evm.TU.scaffold_32.108/CpbHLH128	18.5626	14.2507	16.2034	13.8841	18.0427	32.5935	11.423	11.9372	14.9289	9.22461	11.3875	14.0988
evm.TU.scaffold_1094.29/CpbHLH129	6.45735	4.87282	1.1147	1.07837	1.3605	0	59.3454	12.2484	7.30494	0.095842	0.166132	0.161159
evm.TU.scaffold_75.48/CpbHLH131	9.27797	7.61271	11.3252	10.5448	9.50071	12.6392	1.91227	2.479	3.16975	6.53077	7.17788	9.37745
[truncated: 32 more columns]
